# Supplementary material for: Synthesis of 2-substituted-3-(1H-indol-3-yl)isoindolin-1-one derivatives in water under catalyst-free conditions
Source: Royal Society of Chemistry journal article supplement (doi:10.1039/c3gc41882k), 2014-01-01

## Supporting Information

# Synthesis of 2-substituted-3-(1*H*-indol-3-yl)isoindolin-1-one derivatives in water under catalyst-free conditions

Fanglei Chen, Min Lei\*, Lihong Hu\*

*Shanghai Research Center for Modernization of Traditional Chinese Medicine,  
Shanghai Institute of Materia Medica, Chinese Academy of Sciences, Shanghai  
201203, P. R. China.*

*E-mail: [mlei@sim.ac.cn](mailto:mlei@sim.ac.cn); [lhu@sim.ac.cn](mailto:lhu@sim.ac.cn)*

|             |                                                                                                                                                     |    |
|-------------|-----------------------------------------------------------------------------------------------------------------------------------------------------|----|
| <b>S1.</b>  | LCMS spectrum of 2-benzyl-3-(1 <i>H</i> -indol-3-yl)isoindolin-1-one ( <b>4a</b> ).....                                                             | 9  |
| <b>S2.</b>  | <sup>1</sup> H NMR spectrum of 2-benzyl-3-(1 <i>H</i> -indol-3-yl)isoindolin-1-one ( <b>4a</b> ) in DMSO- <i>d</i> <sub>6</sub> .....               | 10 |
| <b>S3.</b>  | <sup>13</sup> C NMR spectrum of 2-benzyl-3-(1 <i>H</i> -indol-3-yl)isoindolin-1-one ( <b>4a</b> ) in DMSO- <i>d</i> <sub>6</sub> .....              | 11 |
| <b>S4.</b>  | LCMS spectrum of 3-(1 <i>H</i> -indol-3-yl)-2-(4-methoxybenzyl)isoindolin-1-one ( <b>4b</b> ).<br>.....                                             | 12 |
| <b>S5.</b>  | <sup>1</sup> H NMR spectrum of 3-(1 <i>H</i> -indol-3-yl)-2-(4-methoxybenzyl)isoindolin-1-one ( <b>4b</b> ) in DMSO- <i>d</i> <sub>6</sub> .....    | 13 |
| <b>S6.</b>  | <sup>13</sup> C NMR spectrum of 3-(1 <i>H</i> -indol-3-yl)-2-(4-methoxybenzyl)isoindolin-1-one ( <b>4b</b> ) in DMSO- <i>d</i> <sub>6</sub> .....   | 14 |
| <b>S7.</b>  | LCMS spectrum of 2-(4-chlorobenzyl)-3-(1 <i>H</i> -indol-3-yl)isoindolin-1-one ( <b>4c</b> )..                                                      | 15 |
| <b>S8.</b>  | <sup>1</sup> H NMR spectrum of 2-(4-chlorobenzyl)-3-(1 <i>H</i> -indol-3-yl)isoindolin-1-one ( <b>4c</b> ) in DMSO- <i>d</i> <sub>6</sub> .....     | 16 |
| <b>S9.</b>  | <sup>13</sup> C NMR spectrum of 2-(4-chlorobenzyl)-3-(1 <i>H</i> -indol-3-yl)isoindolin-1-one ( <b>4c</b> ) in DMSO- <i>d</i> <sub>6</sub> .....    | 17 |
| <b>S10.</b> | LCMS spectrum of 2-(4-fluorophenethyl)-3-(1 <i>H</i> -indol-3-yl)isoindolin-1-one ( <b>4d</b> ).....                                                | 18 |
| <b>S11.</b> | <sup>1</sup> H NMR spectrum of 2-(4-fluorophenethyl)-3-(1 <i>H</i> -indol-3-yl)isoindolin-1-one ( <b>4d</b> ) in DMSO- <i>d</i> <sub>6</sub> .....  | 19 |
| <b>S12.</b> | <sup>13</sup> C NMR spectrum of 2-(4-fluorophenethyl)-3-(1 <i>H</i> -indol-3-yl)isoindolin-1-one ( <b>4d</b> ) in DMSO- <i>d</i> <sub>6</sub> ..... | 20 |
| <b>S13.</b> | LCMS spectrum of                                                                                                                                    |    |

|                                                                                                                                                                       |    |
|-----------------------------------------------------------------------------------------------------------------------------------------------------------------------|----|
| 2-(3,4-dimethoxyphenethyl)-3-(1 <i>H</i> -indol-3-yl)isoindolin-1-one ( <b>4e</b> ).....                                                                              | 21 |
| <b>S14.</b> <sup>1</sup> H NMR spectrum of<br>2-(3,4-dimethoxyphenethyl)-3-(1 <i>H</i> -indol-3-yl)isoindolin-1-one ( <b>4e</b> ) in DMSO- <i>d</i> <sub>6</sub> ...  | 22 |
| <b>S15.</b> <sup>13</sup> C NMR spectrum of<br>2-(3,4-dimethoxyphenethyl)-3-(1 <i>H</i> -indol-3-yl)isoindolin-1-one ( <b>4e</b> ) in DMSO- <i>d</i> <sub>6</sub> ... | 23 |
| <b>S16.</b> LCMS spectrum of 3-(1 <i>H</i> -indol-3-yl)-2-(4-nitrophenethyl)isoindolin-1-one ( <b>4f</b> ).<br>.....                                                  | 24 |
| <b>S17.</b> <sup>1</sup> H NMR spectrum of 3-(1 <i>H</i> -indol-3-yl)-2-(4-nitrophenethyl)isoindolin-1-one ( <b>4f</b> )<br>in DMSO- <i>d</i> <sub>6</sub> .....      | 25 |
| <b>S18.</b> <sup>13</sup> C NMR spectrum of 3-(1 <i>H</i> -indol-3-yl)-2-(4-nitrophenethyl)isoindolin-1-one ( <b>4f</b> )<br>in DMSO- <i>d</i> <sub>6</sub> .....     | 26 |
| <b>S19.</b> LCMS spectrum of 2-(furan-2-ylmethyl)-3-(1 <i>H</i> -indol-3-yl)isoindolin-1-one ( <b>4g</b> ).<br>.....                                                  | 27 |
| <b>S20.</b> <sup>1</sup> H NMR spectrum of 2-(furan-2-ylmethyl)-3-(1 <i>H</i> -indol-3-yl)isoindolin-1-one ( <b>4g</b> )<br>in DMSO- <i>d</i> <sub>6</sub> .....      | 28 |
| <b>S21.</b> <sup>13</sup> C NMR spectrum of 2-(furan-2-ylmethyl)-3-(1 <i>H</i> -indol-3-yl)isoindolin-1-one<br>( <b>4g</b> ) in DMSO- <i>d</i> <sub>6</sub> .....     | 29 |
| <b>S22.</b> LCMS spectrum of 3-(1 <i>H</i> -indol-3-yl)-2-(pyridin-2-ylmethyl)isoindolin-1-one<br>( <b>4h</b> ).....                                                  | 30 |
| <b>S23.</b> <sup>1</sup> H NMR spectrum of 3-(1 <i>H</i> -indol-3-yl)-2-(pyridin-2-ylmethyl)isoindolin-1-one<br>( <b>4h</b> ) in DMSO- <i>d</i> <sub>6</sub> .....    | 31 |
| <b>S24.</b> <sup>13</sup> C NMR spectrum of 3-(1 <i>H</i> -indol-3-yl)-2-(pyridin-2-ylmethyl)isoindolin-1-one<br>( <b>4h</b> ) in DMSO- <i>d</i> <sub>6</sub> .....   | 32 |

|                                                                                                                                                                |    |
|----------------------------------------------------------------------------------------------------------------------------------------------------------------|----|
| <b>S25.</b> LCMS spectrum of 3-(1 <i>H</i> -Indol-3-yl)-2-phenylisoindolin-1-one ( <b>4i</b> ). .....                                                          | 33 |
| <b>S26.</b> <sup>1</sup> H NMR spectrum of 3-(1 <i>H</i> -Indol-3-yl)-2-phenylisoindolin-1-one ( <b>4i</b> ) in DMSO- <i>d</i> <sub>6</sub> .....              | 34 |
| <b>S27.</b> <sup>13</sup> C NMR spectrum of 3-(1 <i>H</i> -Indol-3-yl)-2-phenylisoindolin-1-one ( <b>4i</b> ) in DMSO- <i>d</i> <sub>6</sub> .....             | 35 |
| <b>S28.</b> LCMS spectrum of 3-(1 <i>H</i> -indol-3-yl)-2-(4-methoxyphenyl)isoindolin-1-one ( <b>4j</b> ).<br>.....                                            | 36 |
| <b>S29.</b> <sup>1</sup> H NMR spectrum of 3-(1 <i>H</i> -indol-3-yl)-2-(4-methoxyphenyl)isoindolin-1-one ( <b>4j</b> ) in DMSO- <i>d</i> <sub>6</sub> .....   | 37 |
| <b>S30.</b> <sup>13</sup> C NMR spectrum of 3-(1 <i>H</i> -indol-3-yl)-2-(4-methoxyphenyl)isoindolin-1-one ( <b>4j</b> ) in DMSO- <i>d</i> <sub>6</sub> .....  | 38 |
| <b>S31.</b> LCMS spectrum of 3-(1 <i>H</i> -indol-3-yl)-2-( <i>p</i> -tolyl)isoindolin-1-one ( <b>4k</b> ). .....                                              | 39 |
| <b>S32.</b> <sup>1</sup> H NMR spectrum of 3-(1 <i>H</i> -indol-3-yl)-2-( <i>p</i> -tolyl)isoindolin-1-one ( <b>4k</b> ) in DMSO- <i>d</i> <sub>6</sub> .....  | 40 |
| <b>S33.</b> <sup>13</sup> C NMR spectrum of 3-(1 <i>H</i> -indol-3-yl)-2-( <i>p</i> -tolyl)isoindolin-1-one ( <b>4k</b> ) in DMSO- <i>d</i> <sub>6</sub> ..... | 41 |
| <b>S34.</b> LCMS spectrum of 2-(4-chlorophenyl)-3-(1 <i>H</i> -indol-3-yl)isoindolin-1-one ( <b>4l</b> ).42                                                    |    |
| <b>S35.</b> <sup>1</sup> H NMR spectrum of 2-(4-chlorophenyl)-3-(1 <i>H</i> -indol-3-yl)isoindolin-1-one ( <b>4l</b> ). in DMSO- <i>d</i> <sub>6</sub> .....   | 43 |
| <b>S36.</b> <sup>13</sup> C NMR spectrum of 2-(4-chlorophenyl)-3-(1 <i>H</i> -indol-3-yl)isoindolin-1-one ( <b>4l</b> ). in DMSO- <i>d</i> <sub>6</sub> .....  | 44 |
| <b>S37.</b> LCMS spectrum of 3-(1 <i>H</i> -indol-3-yl)isobenzofuran-1(3 <i>H</i> )-one ( <b>5</b> ). .....                                                    | 45 |
| <b>S38.</b> <sup>1</sup> H NMR spectrum of 3-(1 <i>H</i> -indol-3-yl)isobenzofuran-1(3 <i>H</i> )-one ( <b>5</b> ) in                                          |    |

|                                                                                                                                                          |    |
|----------------------------------------------------------------------------------------------------------------------------------------------------------|----|
| DMSO- <i>d</i> <sub>6</sub> .....                                                                                                                        | 46 |
| <b>S39.</b> <sup>13</sup> C NMR spectrum of 3-(1 <i>H</i> -indol-3-yl)isobenzofuran-1(3 <i>H</i> )-one ( <b>5</b> ) in DMSO- <i>d</i> <sub>6</sub> ..... | 47 |
| <b>S40.</b> LCMS spectrum of 3-(1 <i>H</i> -Indol-3-yl)-2-propylisoindolin-1-one ( <b>4n</b> ).....                                                      | 48 |
| <b>S41.</b> <sup>1</sup> H NMR spectrum of 3-(1 <i>H</i> -Indol-3-yl)-2-propylisoindolin-1-one ( <b>4n</b> ) in DMSO- <i>d</i> <sub>6</sub> .....        | 49 |
| <b>S42.</b> <sup>13</sup> C NMR spectrum of 3-(1 <i>H</i> -Indol-3-yl)-2-propylisoindolin-1-one ( <b>4n</b> ) in DMSO- <i>d</i> <sub>6</sub> .....       | 50 |
| <b>S43.</b> LCMS spectrum of 2-butyl-3-(1 <i>H</i> -indol-3-yl)isoindolin-1-one ( <b>4o</b> ). ....                                                      | 51 |
| <b>S44.</b> <sup>1</sup> H NMR spectrum of 2-butyl-3-(1 <i>H</i> -indol-3-yl)isoindolin-1-one ( <b>4o</b> ) in DMSO- <i>d</i> <sub>6</sub> .....         | 52 |
| <b>S45.</b> <sup>13</sup> C NMR spectrum of 2-butyl-3-(1 <i>H</i> -indol-3-yl)isoindolin-1-one ( <b>4o</b> ) in DMSO- <i>d</i> <sub>6</sub> .....        | 53 |
| <b>S46.</b> LCMS spectrum of 3-(1 <i>H</i> -Indol-3-yl)-2-isobutylisoindolin-1-one ( <b>4p</b> ). ....                                                   | 54 |
| <b>S47.</b> <sup>1</sup> H NMR spectrum of 3-(1 <i>H</i> -Indol-3-yl)-2-isobutylisoindolin-1-one ( <b>4p</b> ) in DMSO- <i>d</i> <sub>6</sub> .....      | 55 |
| <b>S48.</b> <sup>13</sup> C NMR spectrum of 3-(1 <i>H</i> -Indol-3-yl)-2-isobutylisoindolin-1-one ( <b>4p</b> ) in DMSO- <i>d</i> <sub>6</sub> .....     | 56 |
| <b>S49.</b> LCMS spectrum of 3-(1 <i>H</i> -indol-3-yl)-2-isopropylisoindolin-1-one ( <b>4q</b> ). ....                                                  | 57 |
| <b>S50.</b> <sup>1</sup> H NMR spectrum of 3-(1 <i>H</i> -indol-3-yl)-2-isopropylisoindolin-1-one ( <b>4q</b> ) in DMSO- <i>d</i> <sub>6</sub> .....     | 58 |
| <b>S51.</b> <sup>13</sup> C NMR spectrum of 3-(1 <i>H</i> -indol-3-yl)-2-isopropylisoindolin-1-one ( <b>4q</b> ) in DMSO- <i>d</i> <sub>6</sub> .....    | 59 |

|             |                                                                                                                                                    |    |
|-------------|----------------------------------------------------------------------------------------------------------------------------------------------------|----|
| <b>S52.</b> | LCMS spectrum of 2-cyclopentyl-3-(1 <i>H</i> -indol-3-yl)isoindolin-1-one ( <b>4s</b> ).                                                           | 60 |
| <b>S53.</b> | <sup>1</sup> H NMR spectrum of 2-cyclopentyl-3-(1 <i>H</i> -indol-3-yl)isoindolin-1-one ( <b>4s</b> ) in DMSO- <i>d</i> <sub>6</sub> .             | 61 |
| <b>S54.</b> | <sup>13</sup> C NMR spectrum of 2-cyclopentyl-3-(1 <i>H</i> -indol-3-yl)isoindolin-1-one ( <b>4s</b> ) in DMSO- <i>d</i> <sub>6</sub> .            | 62 |
| <b>S55.</b> | LCMS spectrum of 2-cyclopropyl-3-(1 <i>H</i> -indol-3-yl)isoindolin-1-one ( <b>4t</b> ).                                                           | 63 |
| <b>S56.</b> | <sup>1</sup> H NMR spectrum of 2-cyclopropyl-3-(1 <i>H</i> -indol-3-yl)isoindolin-1-one ( <b>4t</b> ) in DMSO- <i>d</i> <sub>6</sub> .             | 64 |
| <b>S57.</b> | <sup>13</sup> C NMR spectrum of 2-cyclopropyl-3-(1 <i>H</i> -indol-3-yl)isoindolin-1-one ( <b>4t</b> ) in DMSO- <i>d</i> <sub>6</sub> .            | 65 |
| <b>S58.</b> | LCMS spectrum of 3-(2-benzyl-3-oxoisoindolin-1-yl)-1 <i>H</i> -indole-5-carbonitrile ( <b>4u</b> ).                                                | 66 |
| <b>S59.</b> | <sup>1</sup> H NMR spectrum of 3-(2-benzyl-3-oxoisoindolin-1-yl)-1 <i>H</i> -indole-5-carbonitrile ( <b>4u</b> ) in DMSO- <i>d</i> <sub>6</sub> .  | 67 |
| <b>S60.</b> | <sup>13</sup> C NMR spectrum of 3-(2-benzyl-3-oxoisoindolin-1-yl)-1 <i>H</i> -indole-5-carbonitrile ( <b>4u</b> ) in DMSO- <i>d</i> <sub>6</sub> . | 68 |
| <b>S61.</b> | LCMS spectrum of 3-(2-butyl-3-oxoisoindolin-1-yl)-1 <i>H</i> -indole-5-carbonitrile ( <b>4v</b> ).                                                 | 69 |
| <b>S62.</b> | <sup>1</sup> H NMR spectrum of 3-(2-butyl-3-oxoisoindolin-1-yl)-1 <i>H</i> -indole-5-carbonitrile ( <b>4v</b> ) in DMSO- <i>d</i> <sub>6</sub> .   | 70 |
| <b>S63.</b> | <sup>13</sup> C NMR spectrum of 3-(2-butyl-3-oxoisoindolin-1-yl)-1 <i>H</i> -indole-5-carbonitrile ( <b>4v</b> ) in DMSO- <i>d</i> <sub>6</sub> .  | 71 |
| <b>S64.</b> | LCMS spectrum of                                                                                                                                   |    |

|                                                                                                                                                                       |    |
|-----------------------------------------------------------------------------------------------------------------------------------------------------------------------|----|
| 3-(2-cyclopentyl-3-oxoisindolin-1-yl)-1 <i>H</i> -indole-5-carbonitrile ( <b>4w</b> ).....                                                                            | 72 |
| <b>S65.</b> <sup>1</sup> H NMR spectrum of<br>3-(2-cyclopentyl-3-oxoisindolin-1-yl)-1 <i>H</i> -indole-5-carbonitrile ( <b>4w</b> ) in DMSO- <i>d</i> <sub>6</sub> .  | 73 |
| <b>S66.</b> <sup>13</sup> C NMR spectrum of<br>3-(2-cyclopentyl-3-oxoisindolin-1-yl)-1 <i>H</i> -indole-5-carbonitrile ( <b>4w</b> ) in DMSO- <i>d</i> <sub>6</sub> . | 74 |
| <b>S67.</b> LCMS spectrum of 2-benzyl-3-(6-nitro-1 <i>H</i> -indol-3-yl)isoindolin-1-one ( <b>4x</b> )....                                                            | 75 |
| <b>S68.</b> <sup>1</sup> H NMR spectrum of 2-benzyl-3-(6-nitro-1 <i>H</i> -indol-3-yl)isoindolin-1-one ( <b>4x</b> ) in<br>DMSO- <i>d</i> <sub>6</sub> .....          | 76 |
| <b>S69.</b> <sup>13</sup> C NMR spectrum of 2-benzyl-3-(6-nitro-1 <i>H</i> -indol-3-yl)isoindolin-1-one ( <b>4x</b> ) in<br>DMSO- <i>d</i> <sub>6</sub> .....         | 77 |
| <b>S70.</b> LCMS spectrum of 2-benzyl-3-(5-methyl-1 <i>H</i> -indol-3-yl)isoindolin-1-one ( <b>4y</b> ).<br>.....                                                     | 78 |
| <b>S71.</b> <sup>1</sup> H NMR spectrum of 2-benzyl-3-(5-methyl-1 <i>H</i> -indol-3-yl)isoindolin-1-one ( <b>4y</b> )<br>in DMSO- <i>d</i> <sub>6</sub> .....         | 79 |
| <b>S72.</b> <sup>13</sup> C NMR spectrum of 2-benzyl-3-(5-methyl-1 <i>H</i> -indol-3-yl)isoindolin-1-one ( <b>4y</b> )<br>in DMSO- <i>d</i> <sub>6</sub> .....        | 80 |
| <b>S73.</b> LCMS spectrum of 2-benzyl-3-(1-methyl-1 <i>H</i> -indol-3-yl)isoindolin-1-one ( <b>4z</b> ).                                                              | 81 |
| <b>S74.</b> <sup>1</sup> H NMR spectrum of 2-benzyl-3-(1-methyl-1 <i>H</i> -indol-3-yl)isoindolin-1-one ( <b>4z</b> )<br>in DMSO- <i>d</i> <sub>6</sub> .....         | 82 |
| <b>S75.</b> <sup>13</sup> C NMR spectrum of 2-benzyl-3-(1-methyl-1 <i>H</i> -indol-3-yl)isoindolin-1-one ( <b>4z</b> )<br>in DMSO- <i>d</i> <sub>6</sub> .....        | 83 |
| <b>S76.</b> LCMS spectrum of 2-benzyl-3-(1 <i>H</i> -indol-3-yl)-6-methoxyisoindolin-1-one ( <b>4aa</b> ).<br>.....                                                   | 84 |

|                                                                                                                                                       |    |
|-------------------------------------------------------------------------------------------------------------------------------------------------------|----|
| <b>S77.</b> $^1\text{H}$ NMR spectrum of 2-benzyl-3-(1 <i>H</i> -indol-3-yl)-6-methoxyisoindolin-1-one ( <b>4aa</b> ) in $\text{DMSO-}d_6$ .....      | 85 |
| <b>S78.</b> $^{13}\text{C}$ NMR spectrum of 2-benzyl-3-(1 <i>H</i> -indol-3-yl)-6-methoxyisoindolin-1-one ( <b>4aa</b> ) in $\text{DMSO-}d_6$ .....   | 86 |
| <b>S79.</b> LCMS spectrum of 2-benzyl-5-chloro-3-(1 <i>H</i> -indol-3-yl)isoindolin-1-one ( <b>4ab</b> ).<br>.....                                    | 87 |
| <b>S80.</b> $^1\text{H}$ NMR spectrum of 2-benzyl-5-chloro-3-(1 <i>H</i> -indol-3-yl)isoindolin-1-one ( <b>4ab</b> )<br>in $\text{DMSO-}d_6$ .....    | 88 |
| <b>S81.</b> $^{13}\text{C}$ NMR spectrum of 2-benzyl-5-chloro-3-(1 <i>H</i> -indol-3-yl)isoindolin-1-one ( <b>4ab</b> )<br>in $\text{DMSO-}d_6$ ..... | 89 |
| <b>S82.</b> LCMS spectrum of 2-benzyl-3-(1 <i>H</i> -pyrrol-2-yl)isoindolin-1-one ( <b>7</b> ). .....                                                 | 90 |
| <b>S83.</b> $^1\text{H}$ NMR spectrum of 2-benzyl-3-(1 <i>H</i> -pyrrol-2-yl)isoindolin-1-one ( <b>7</b> ) in<br>$\text{DMSO-}d_6$ .....              | 91 |
| <b>S84.</b> $^{13}\text{C}$ NMR spectrum of 2-benzyl-3-(1 <i>H</i> -pyrrol-2-yl)isoindolin-1-one ( <b>7</b> ) in<br>$\text{DMSO-}d_6$ .....           | 92 |



S1. LCMS spectrum of 2-benzyl-3-(1*H*-indol-3-yl)isoindolin-1-one (**4a**).

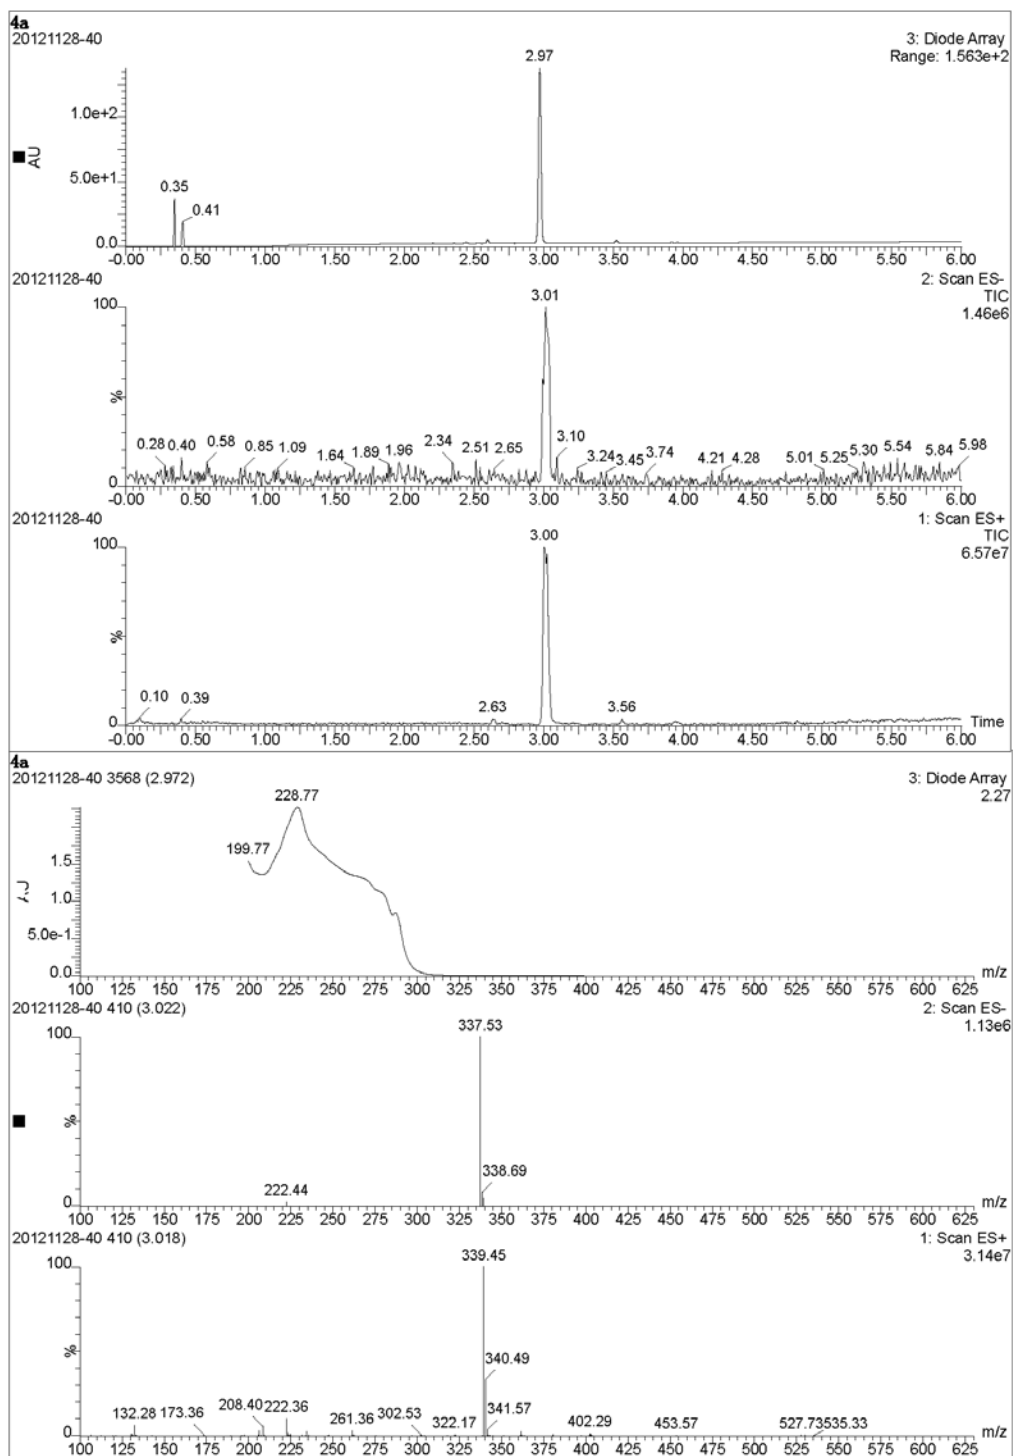

S2.  $^1\text{H}$  NMR spectrum of 2-benzyl-3-(1*H*-indol-3-yl)isoindolin-1-one (**4a**) in  $\text{DMSO-}d_6$ .

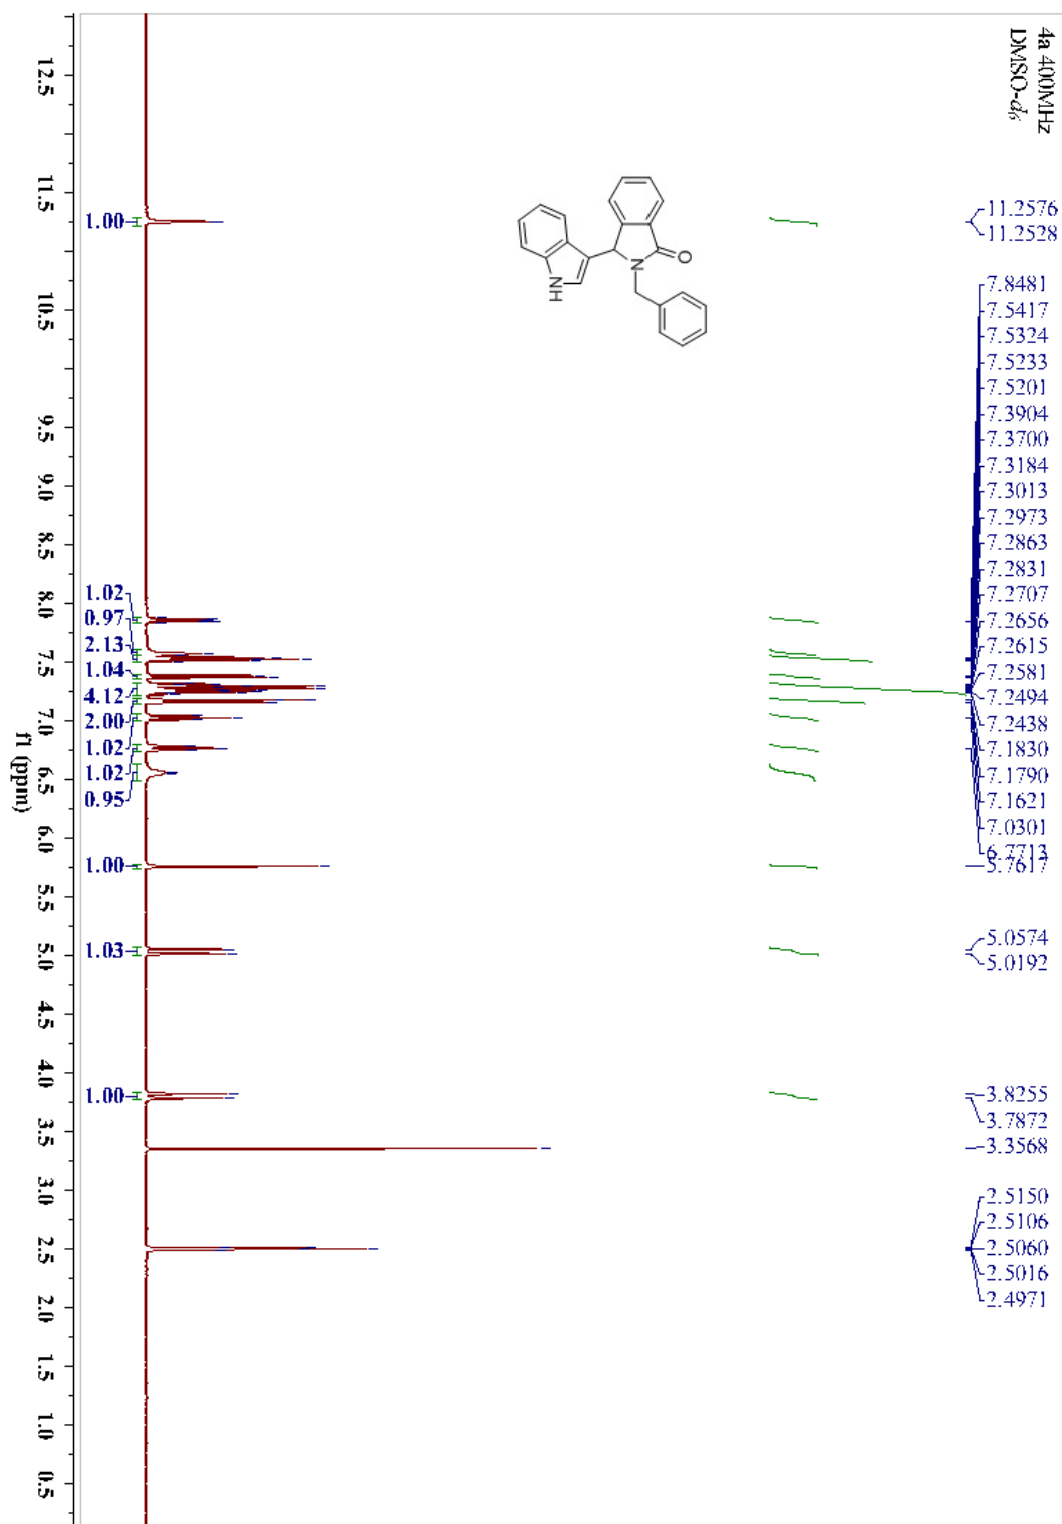

S3.  $^{13}\text{C}$  NMR spectrum of 2-benzyl-3-(1*H*-indol-3-yl)isoindolin-1-one (**4a**) in DMSO- $d_6$ .

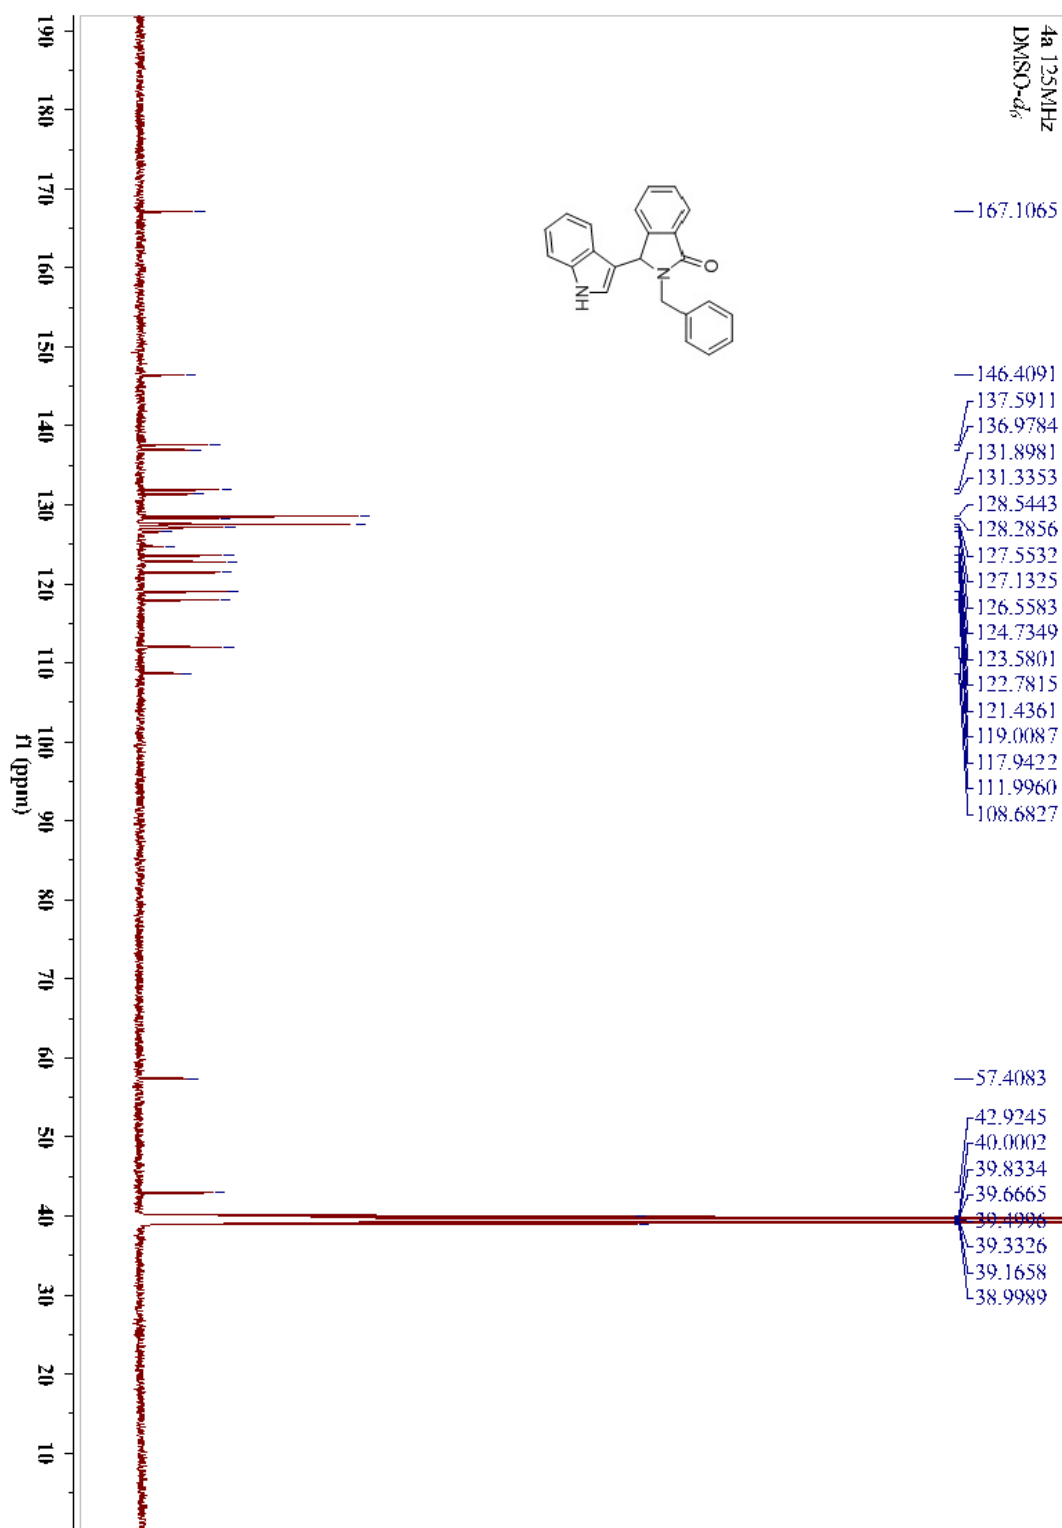

S4. LCMS spectrum of 3-(1*H*-indol-3-yl)-2-(4-methoxybenzyl)isoindolin-1-one (**4b**).

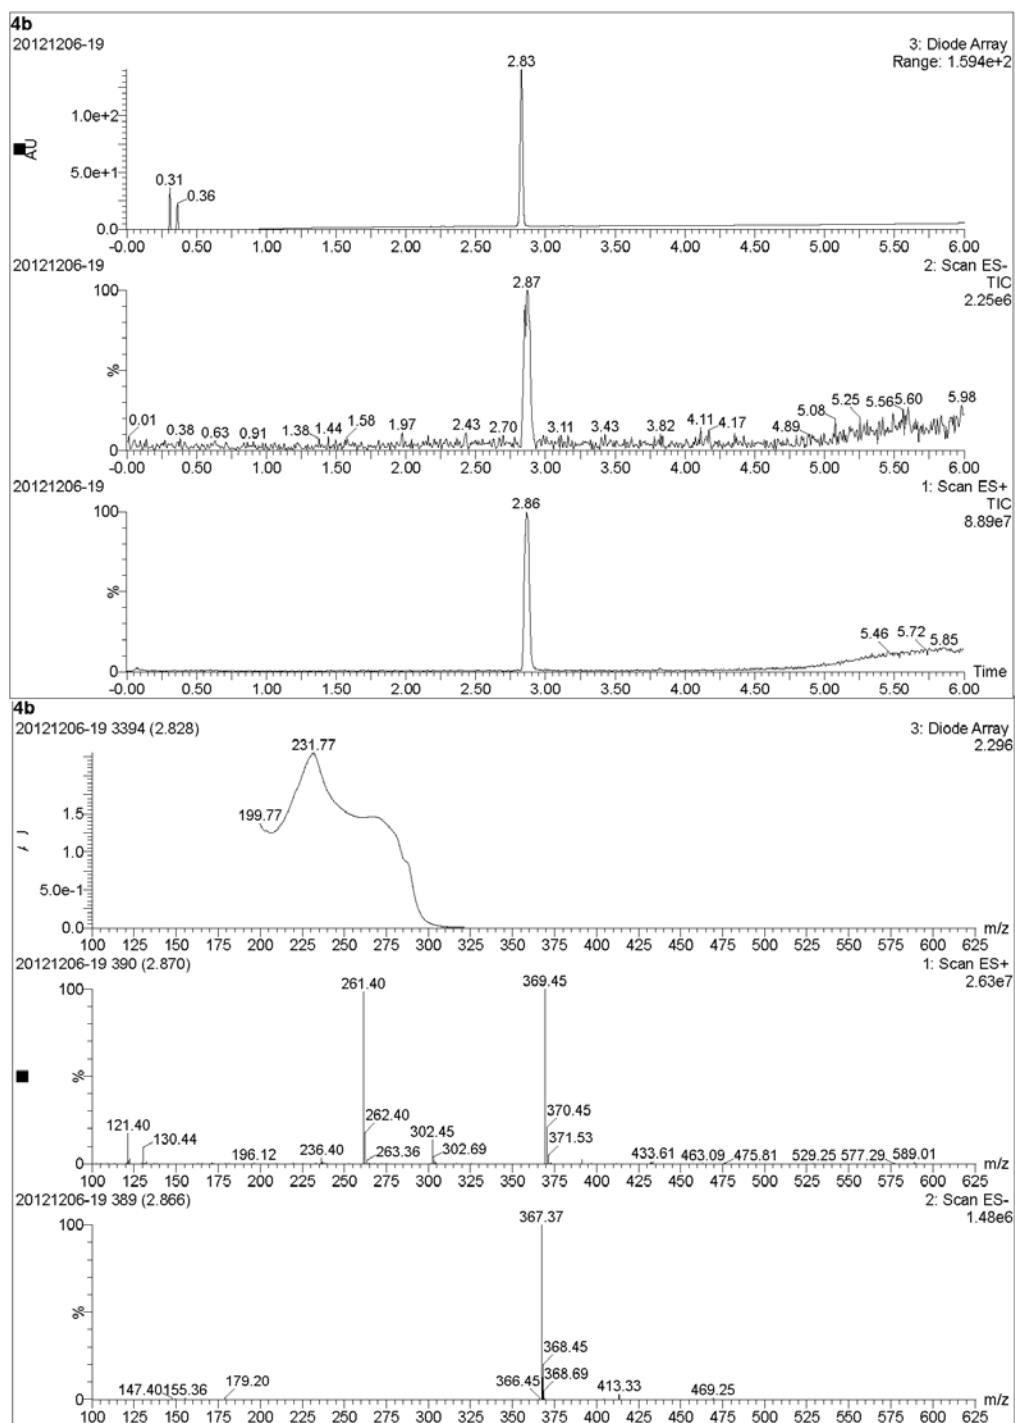

S5.  $^1\text{H}$  NMR spectrum of 3-(1*H*-indol-3-yl)-2-(4-methoxybenzyl)isoindolin-1-one (**4b**)  
in  $\text{DMSO-}d_6$ .

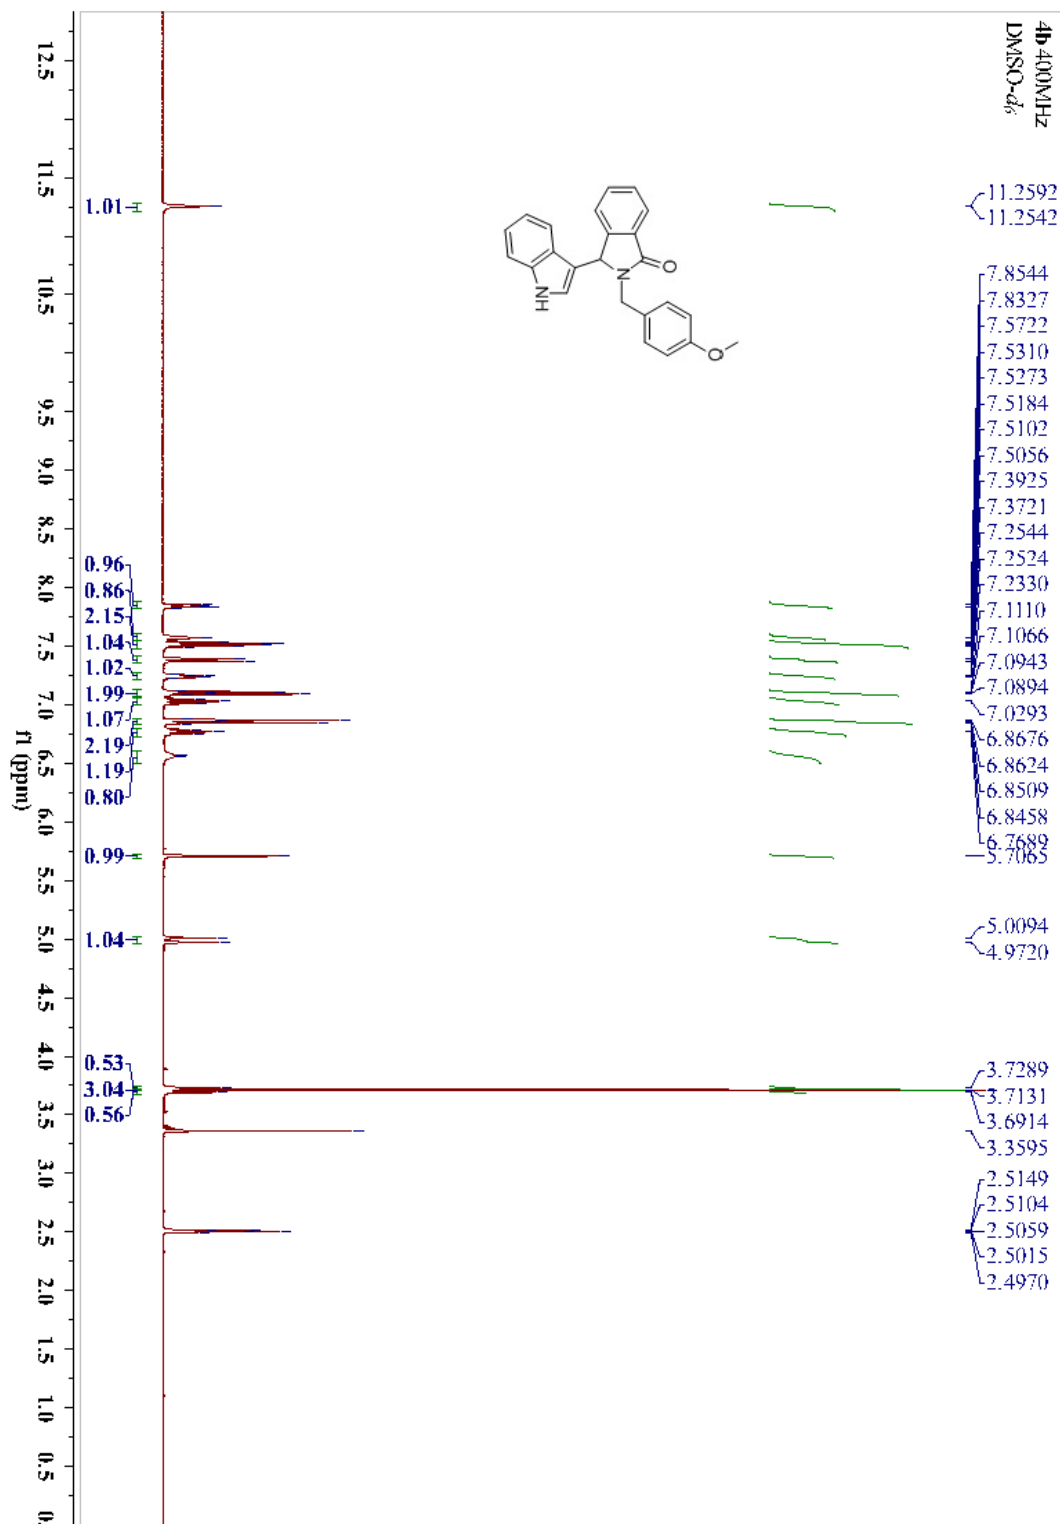

S6.  $^{13}\text{C}$  NMR spectrum of 3-(1*H*-indol-3-yl)-2-(4-methoxybenzyl)isoindolin-1-one (**4b**)  
in  $\text{DMSO-}d_6$ .

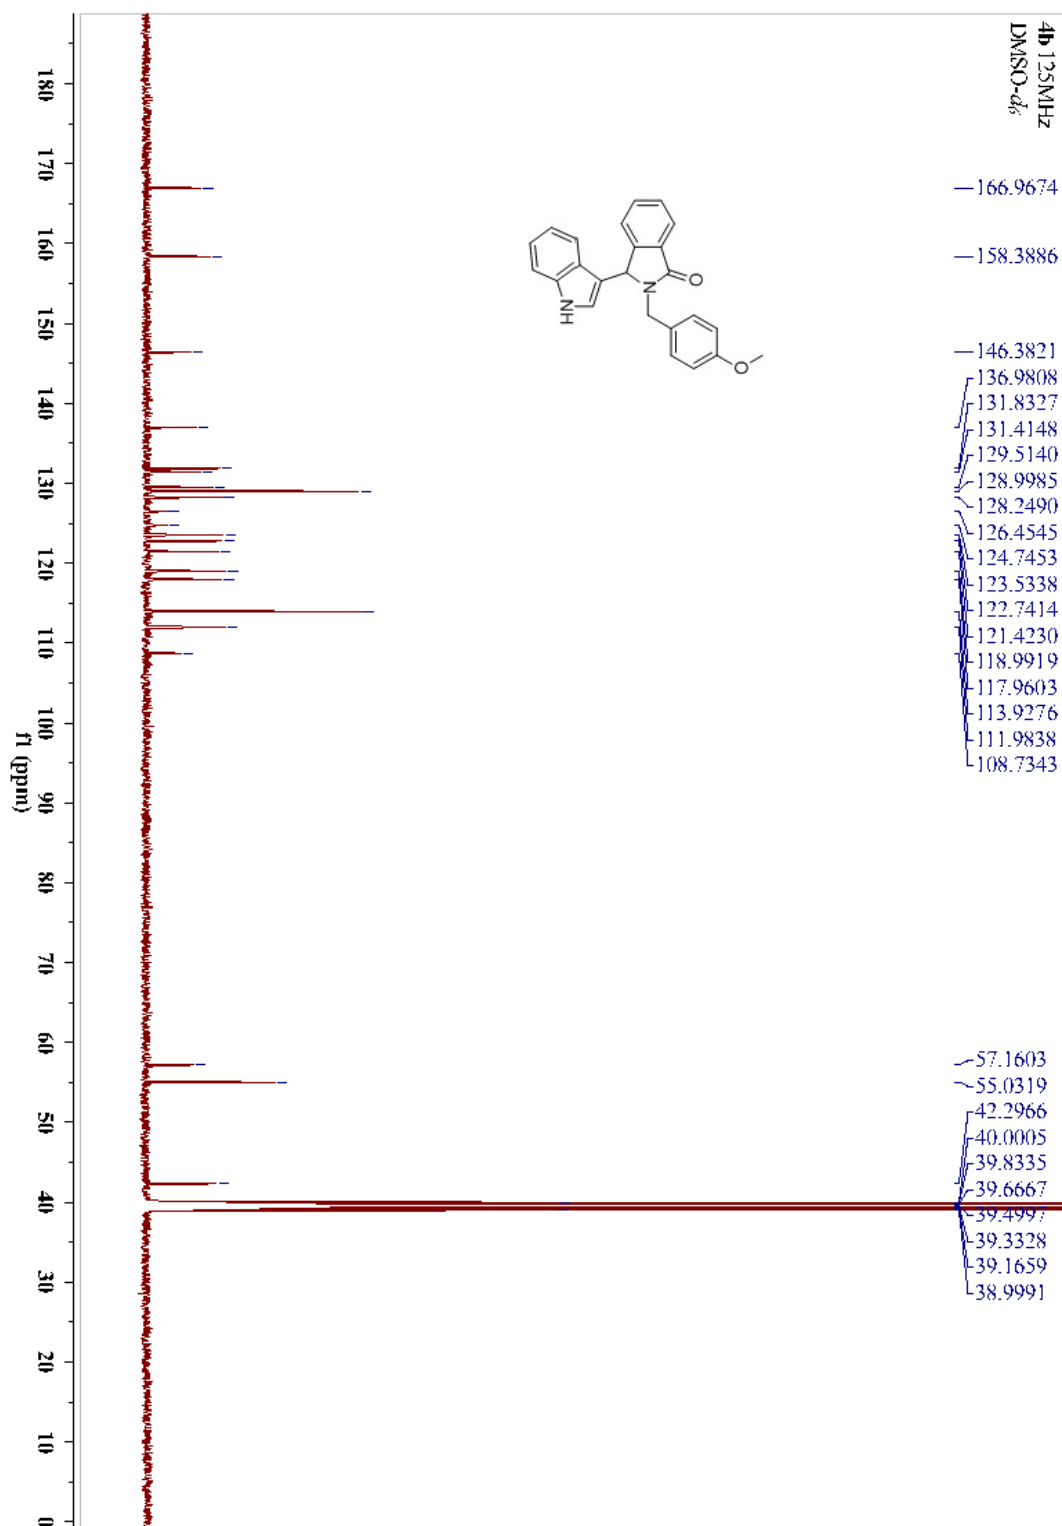

S7. LCMS spectrum of 2-(4-chlorobenzyl)-3-(1*H*-indol-3-yl)isoindolin-1-one (**4c**).

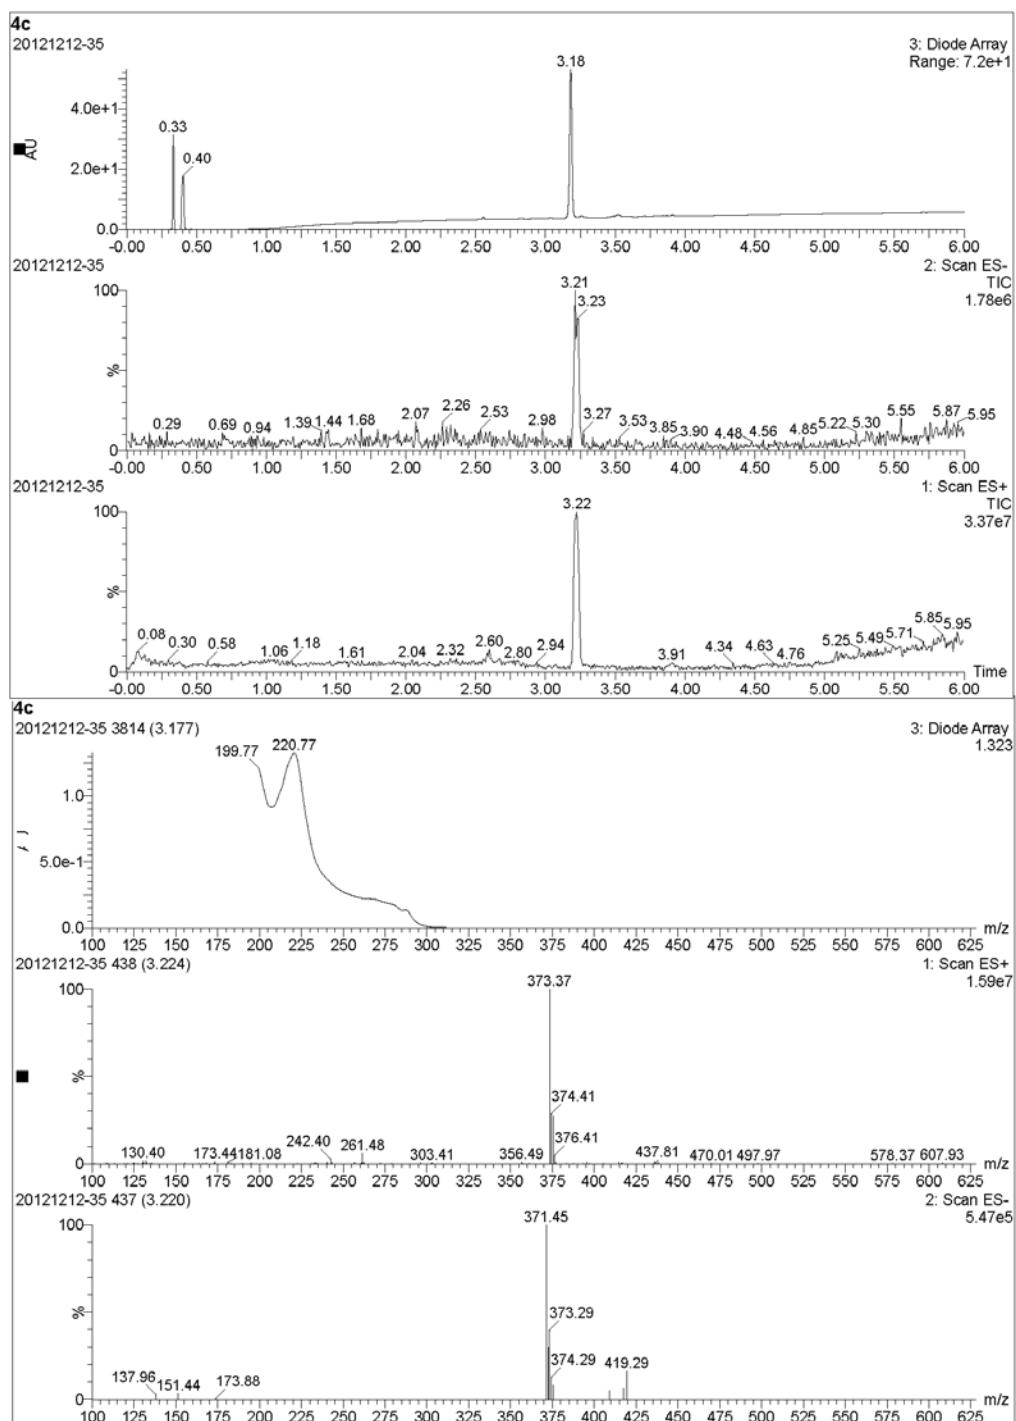

S8.  $^1\text{H}$  NMR spectrum of 2-(4-chlorobenzyl)-3-(1*H*-indol-3-yl)isoindolin-1-one (**4c**) in DMSO- $d_6$ .

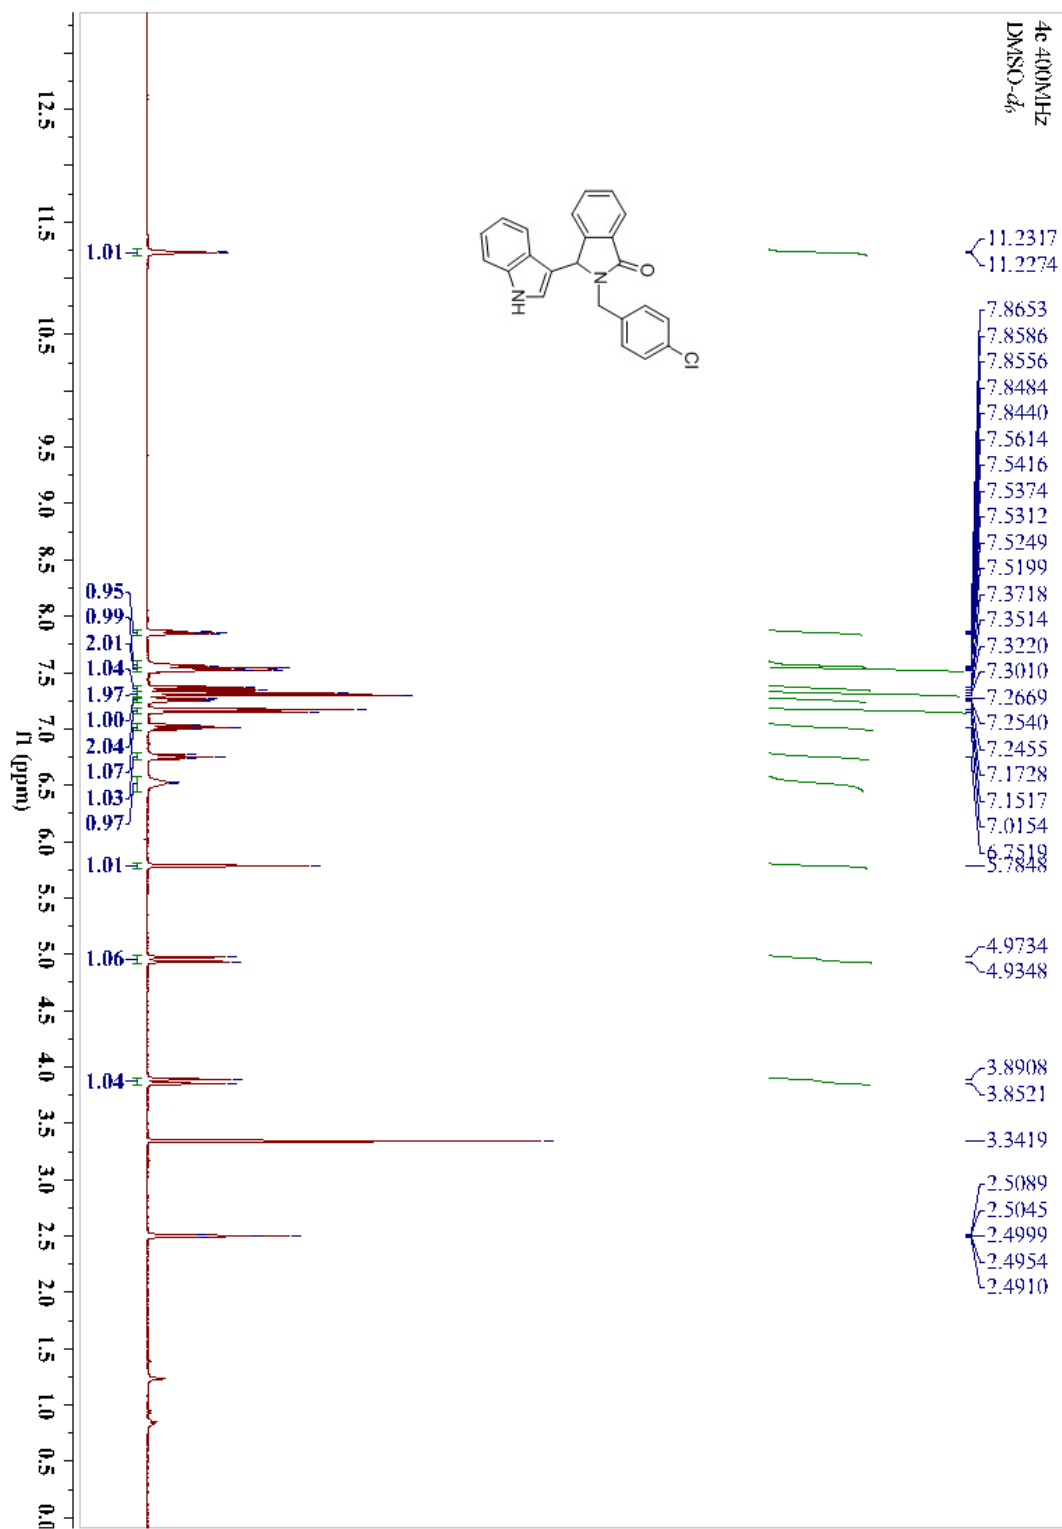



S9.  $^{13}\text{C}$  NMR spectrum of 2-(4-chlorobenzyl)-3-(1*H*-indol-3-yl)isoindolin-1-one (**4c**)  
in  $\text{DMSO-}d_6$ .

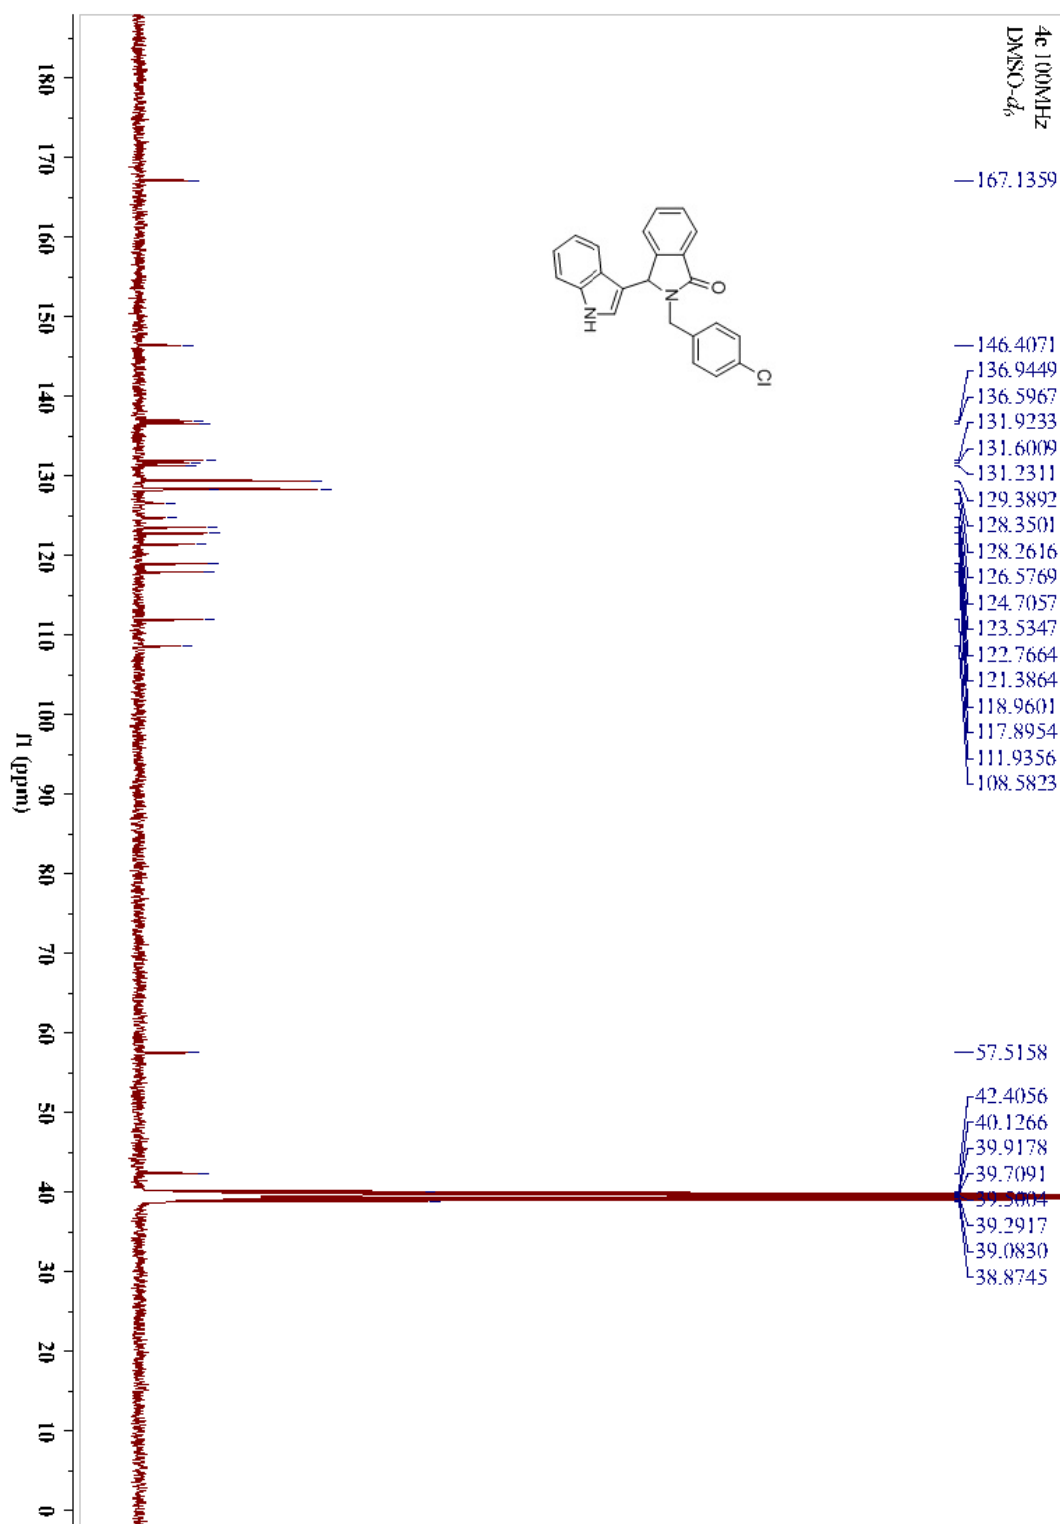

**S10.** LCMS spectrum of 2-(4-fluorophenethyl)-3-(1*H*-indol-3-yl)isoindolin-1-one  
(4d).

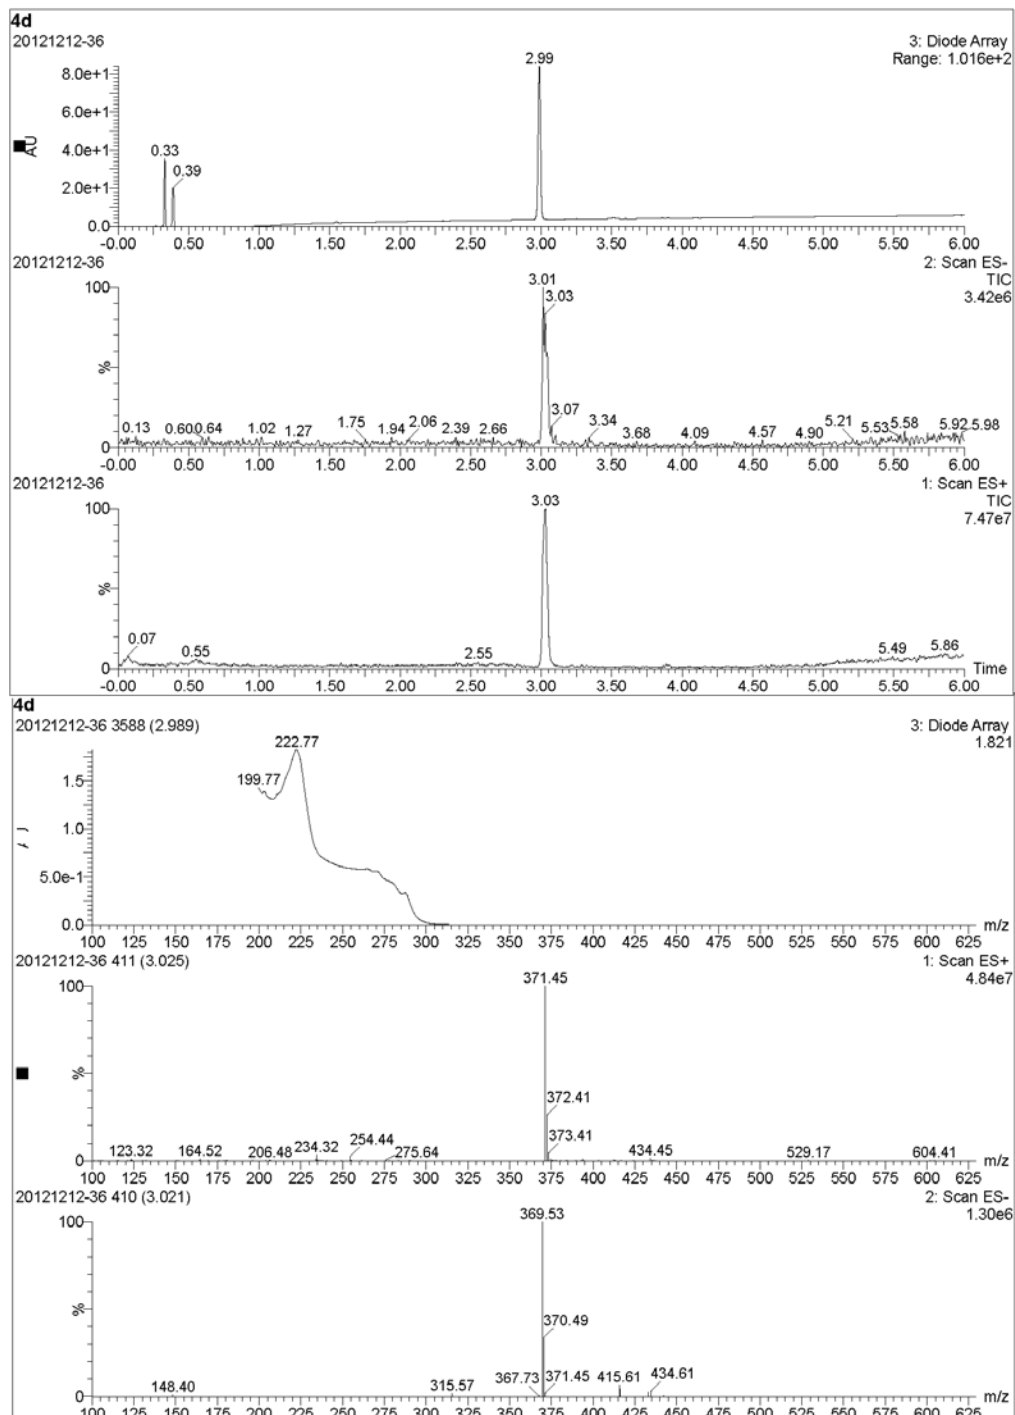

**S11.**  $^1\text{H}$  NMR spectrum of 2-(4-fluorophenethyl)-3-(1*H*-indol-3-yl)isoindolin-1-one  
(**4d**) in  $\text{DMSO-}d_6$ .

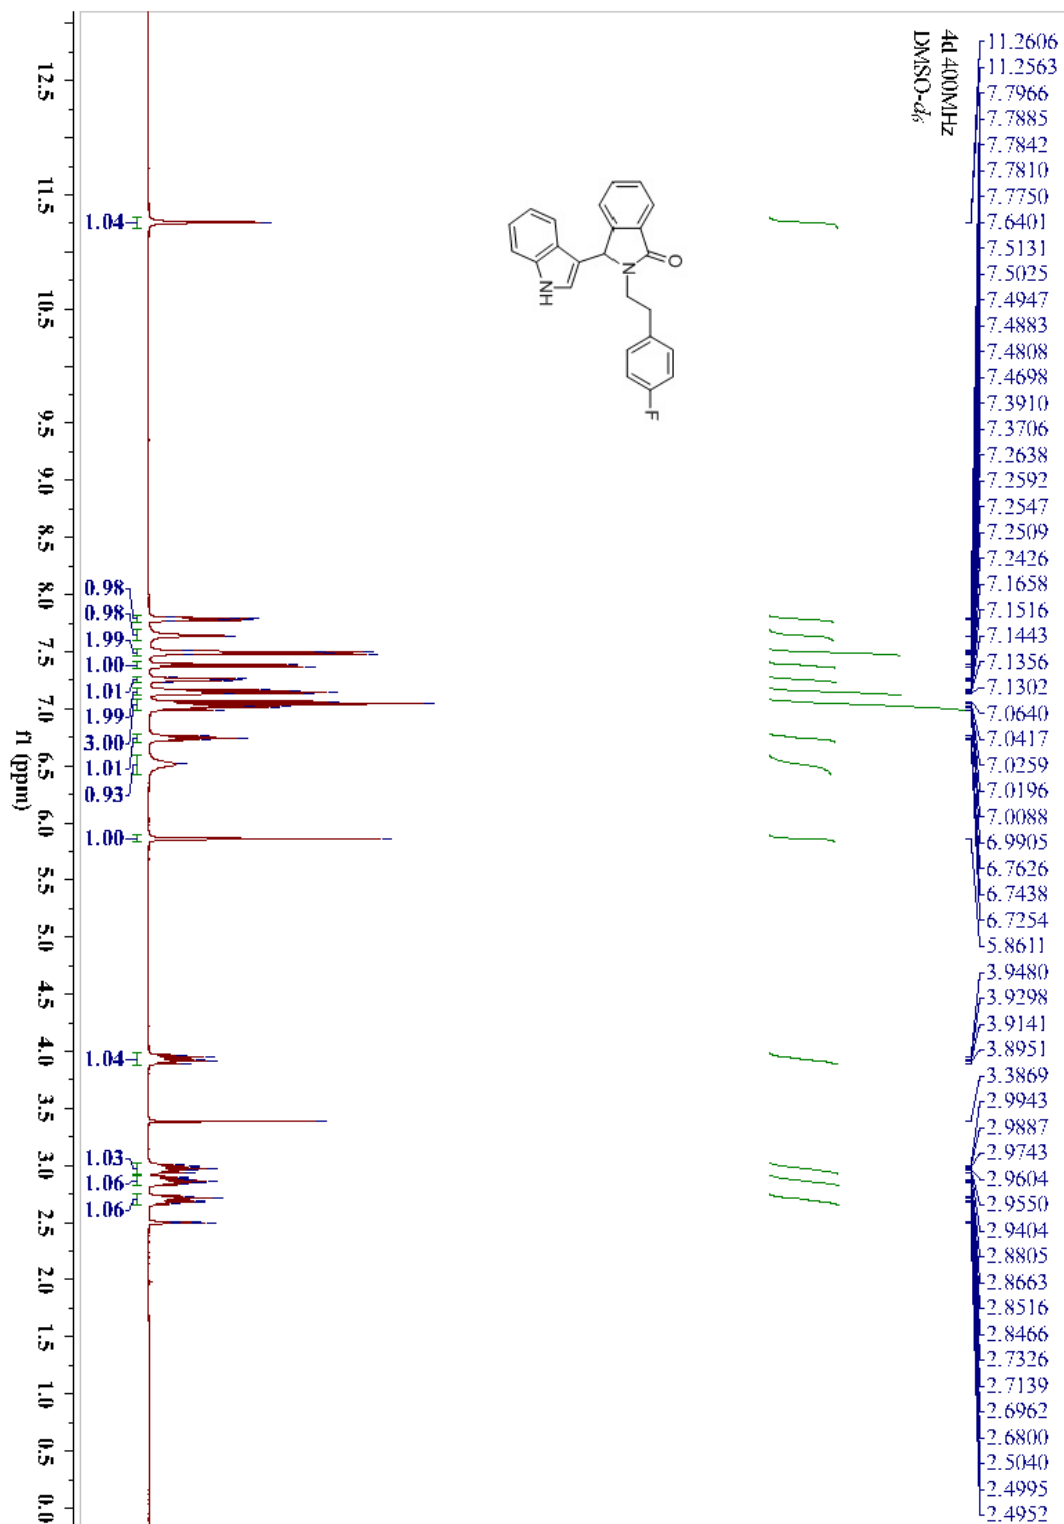

**S12.**  $^{13}\text{C}$  NMR spectrum of 2-(4-fluorophenethyl)-3-(1*H*-indol-3-yl)isoindolin-1-one  
(**4d**) in  $\text{DMSO-}d_6$ .

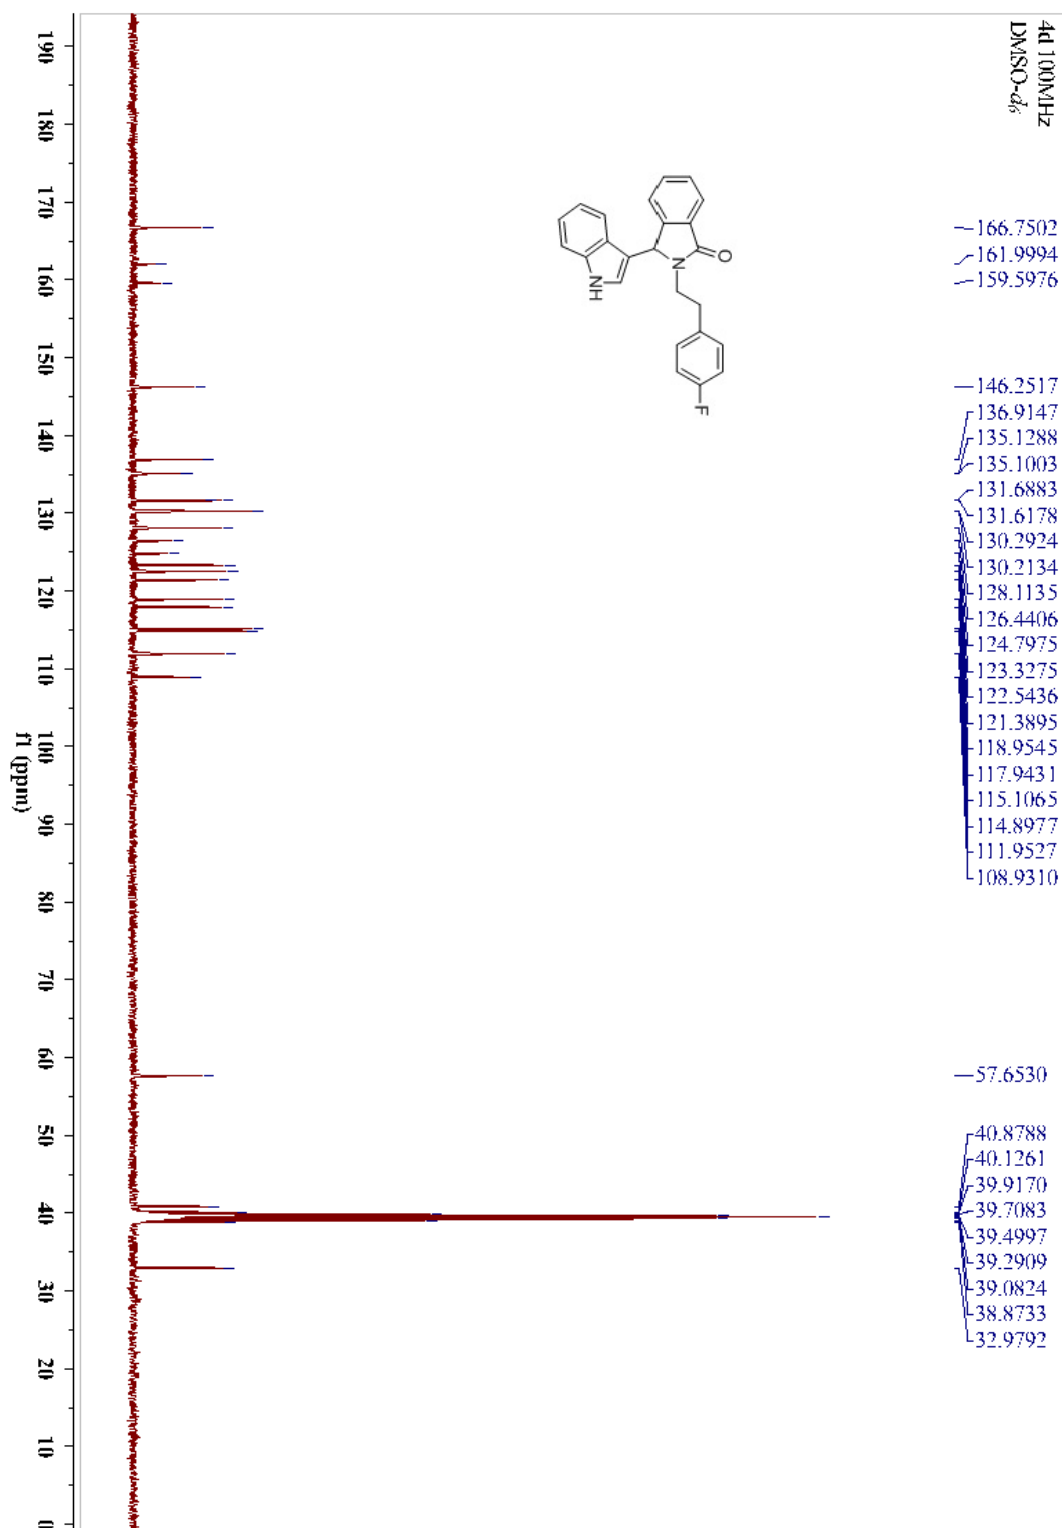

S13. LCMS spectrum of  
2-(3,4-dimethoxyphenethyl)-3-(1*H*-indol-3-yl)isoindolin-1-one (**4e**).

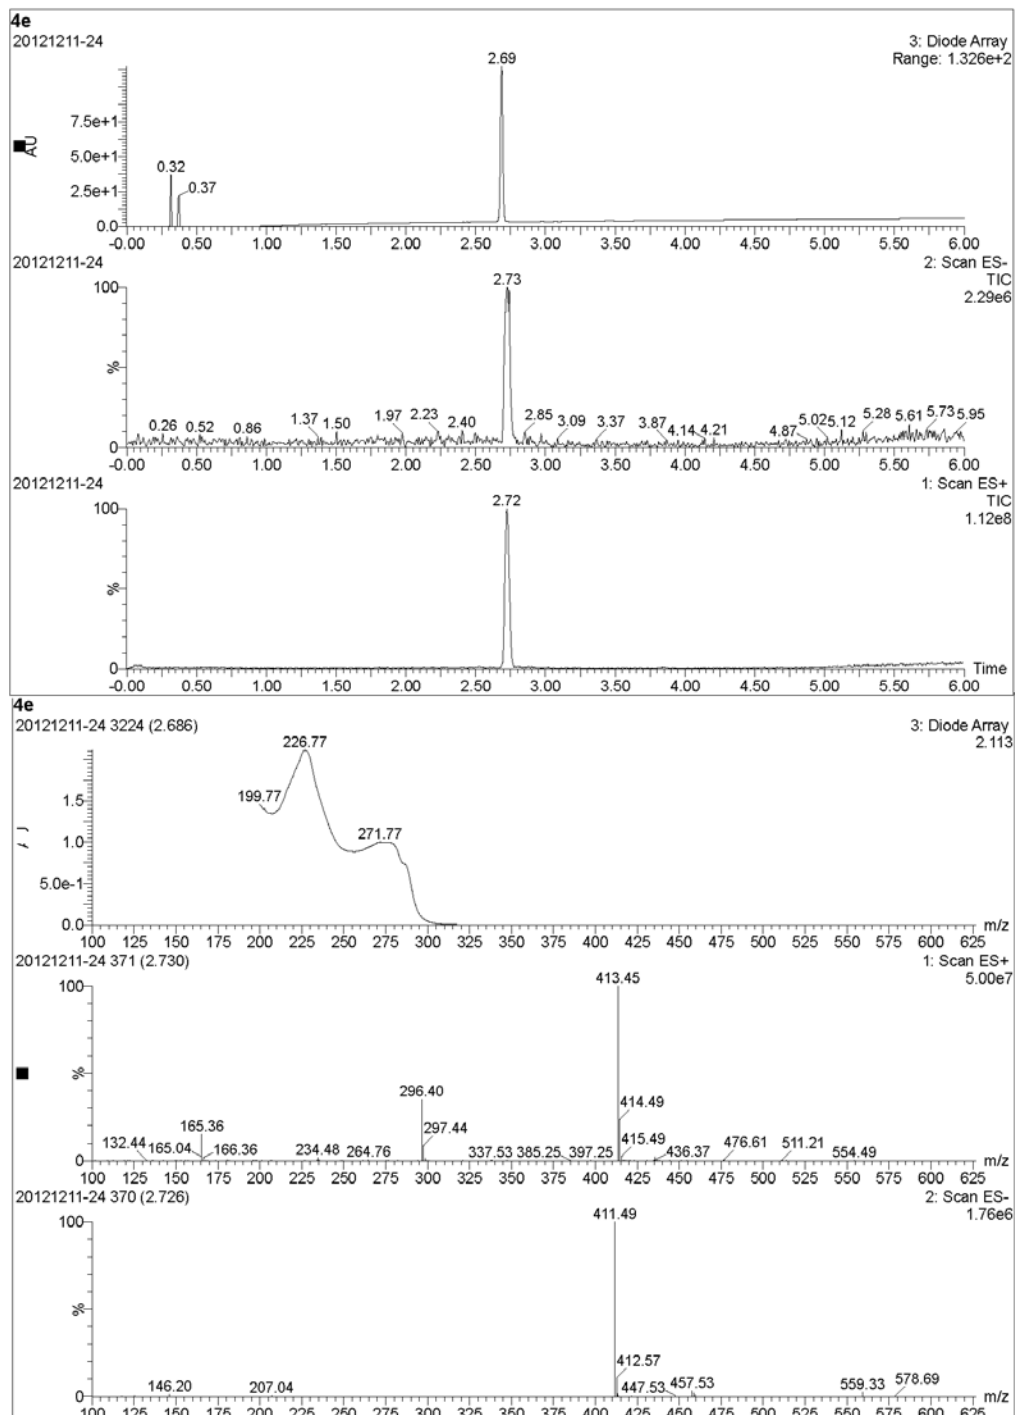

S14.  $^1\text{H}$  NMR spectrum of  
2-(3,4-dimethoxyphenethyl)-3-(1*H*-indol-3-yl)isoindolin-1-one (**4e**) in  $\text{DMSO-}d_6$ .

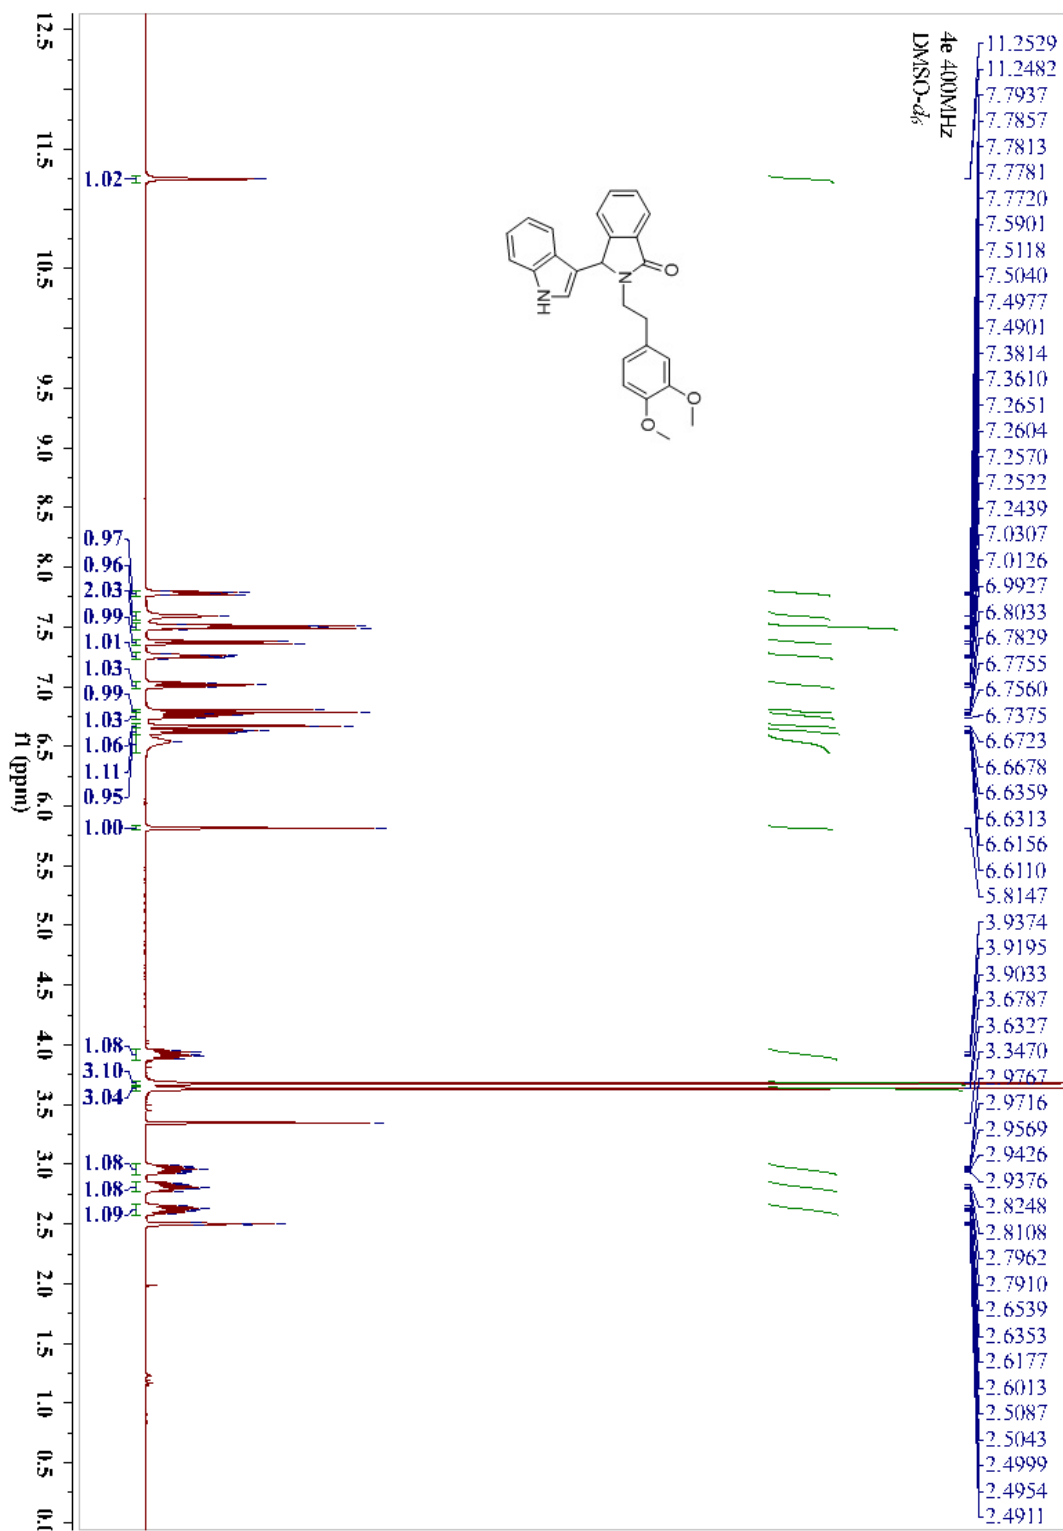

S15.  $^{13}\text{C}$  NMR spectrum of  
2-(3,4-dimethoxyphenethyl)-3-(1*H*-indol-3-yl)isoindolin-1-one (**4e**) in  $\text{DMSO-}d_6$ .

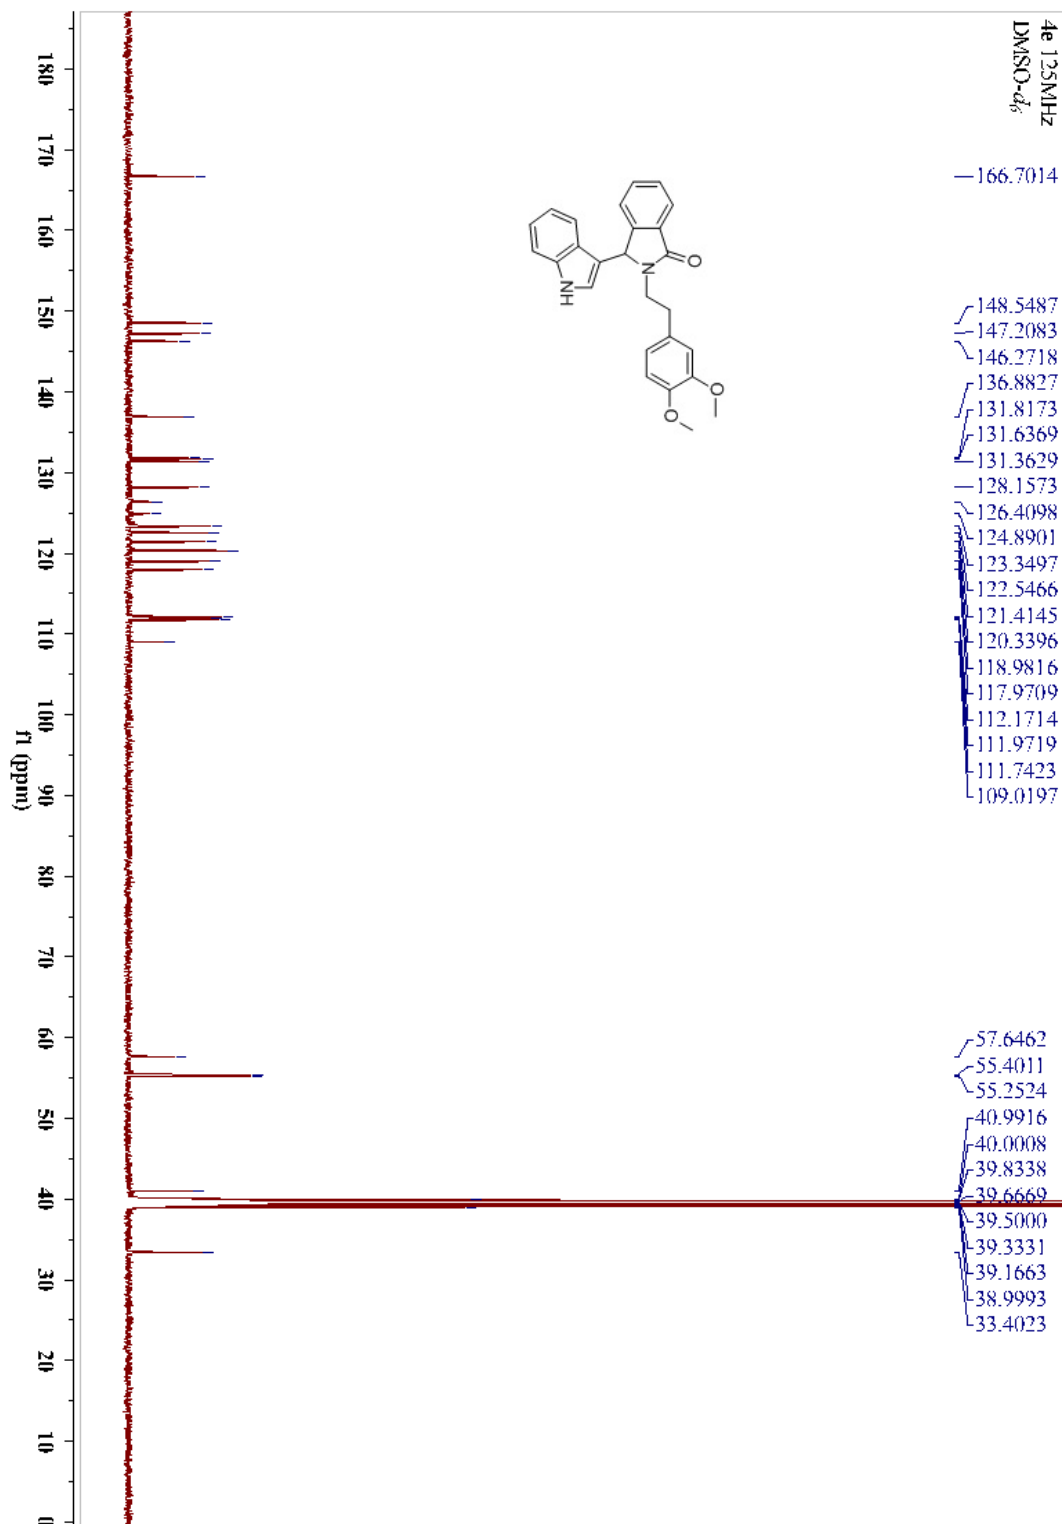

**S16.** LCMS spectrum of 3-(1*H*-indol-3-yl)-2-(4-nitrophenethyl)isoindolin-1-one (**4f**).

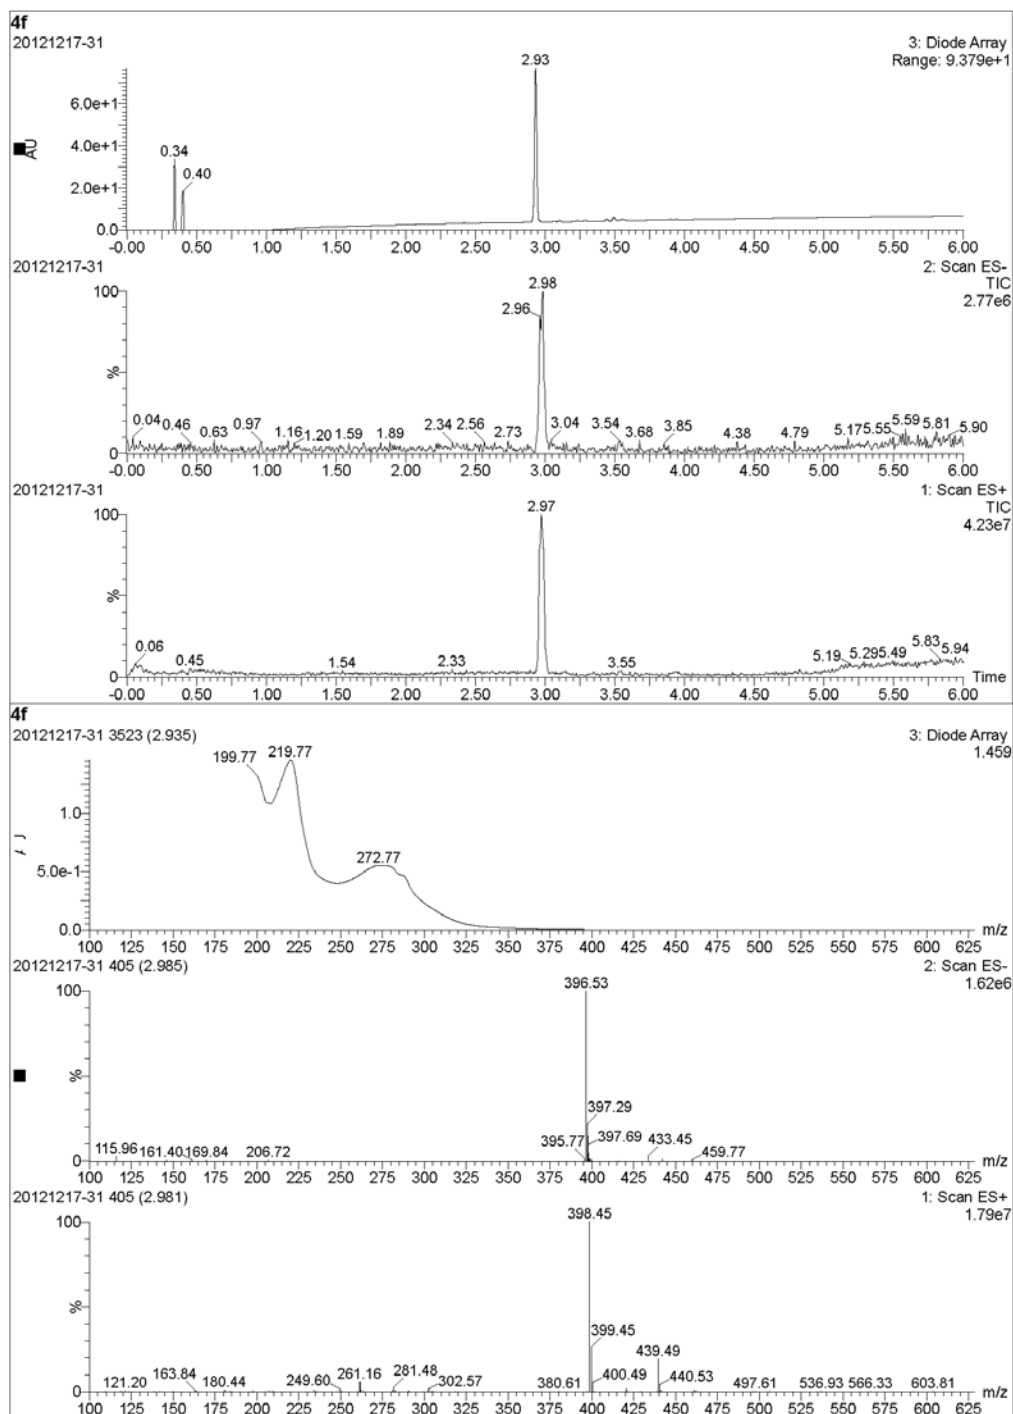



**S17.**  $^1\text{H}$  NMR spectrum of 3-(1*H*-indol-3-yl)-2-(4-nitrophenethyl)isoindolin-1-one (**4f**)  
in  $\text{DMSO-}d_6$ .

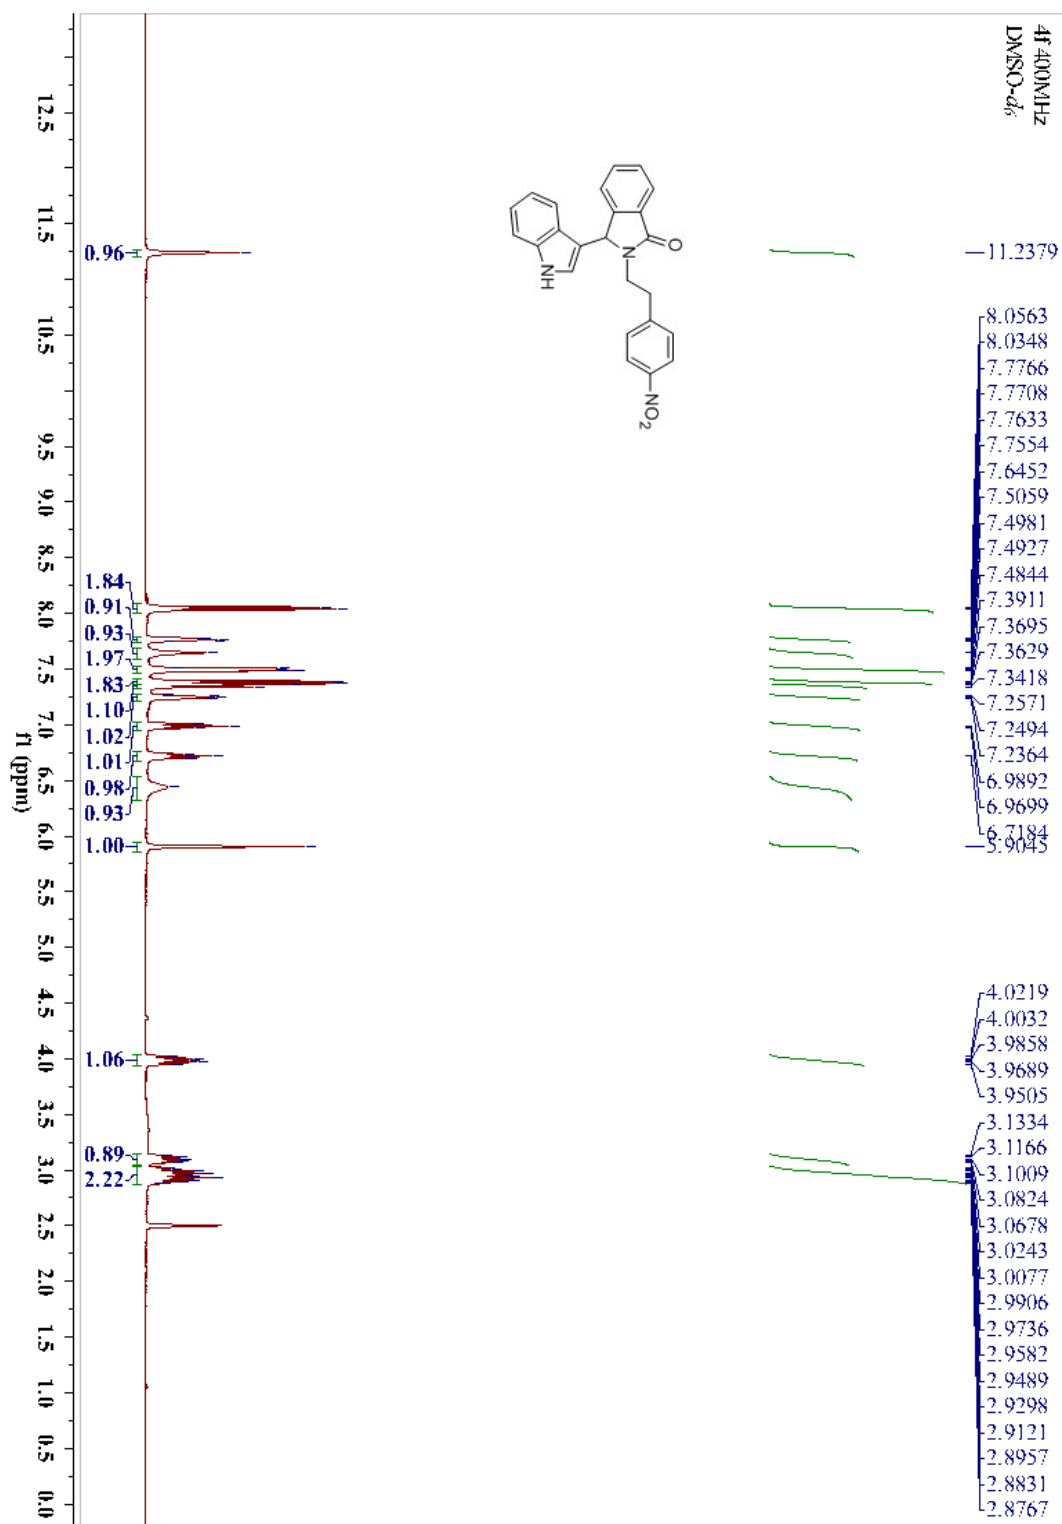

**S18.**  $^{13}\text{C}$  NMR spectrum of 3-(1*H*-indol-3-yl)-2-(4-nitrophenethyl)isoindolin-1-one (**4f**)  
in  $\text{DMSO-}d_6$ .

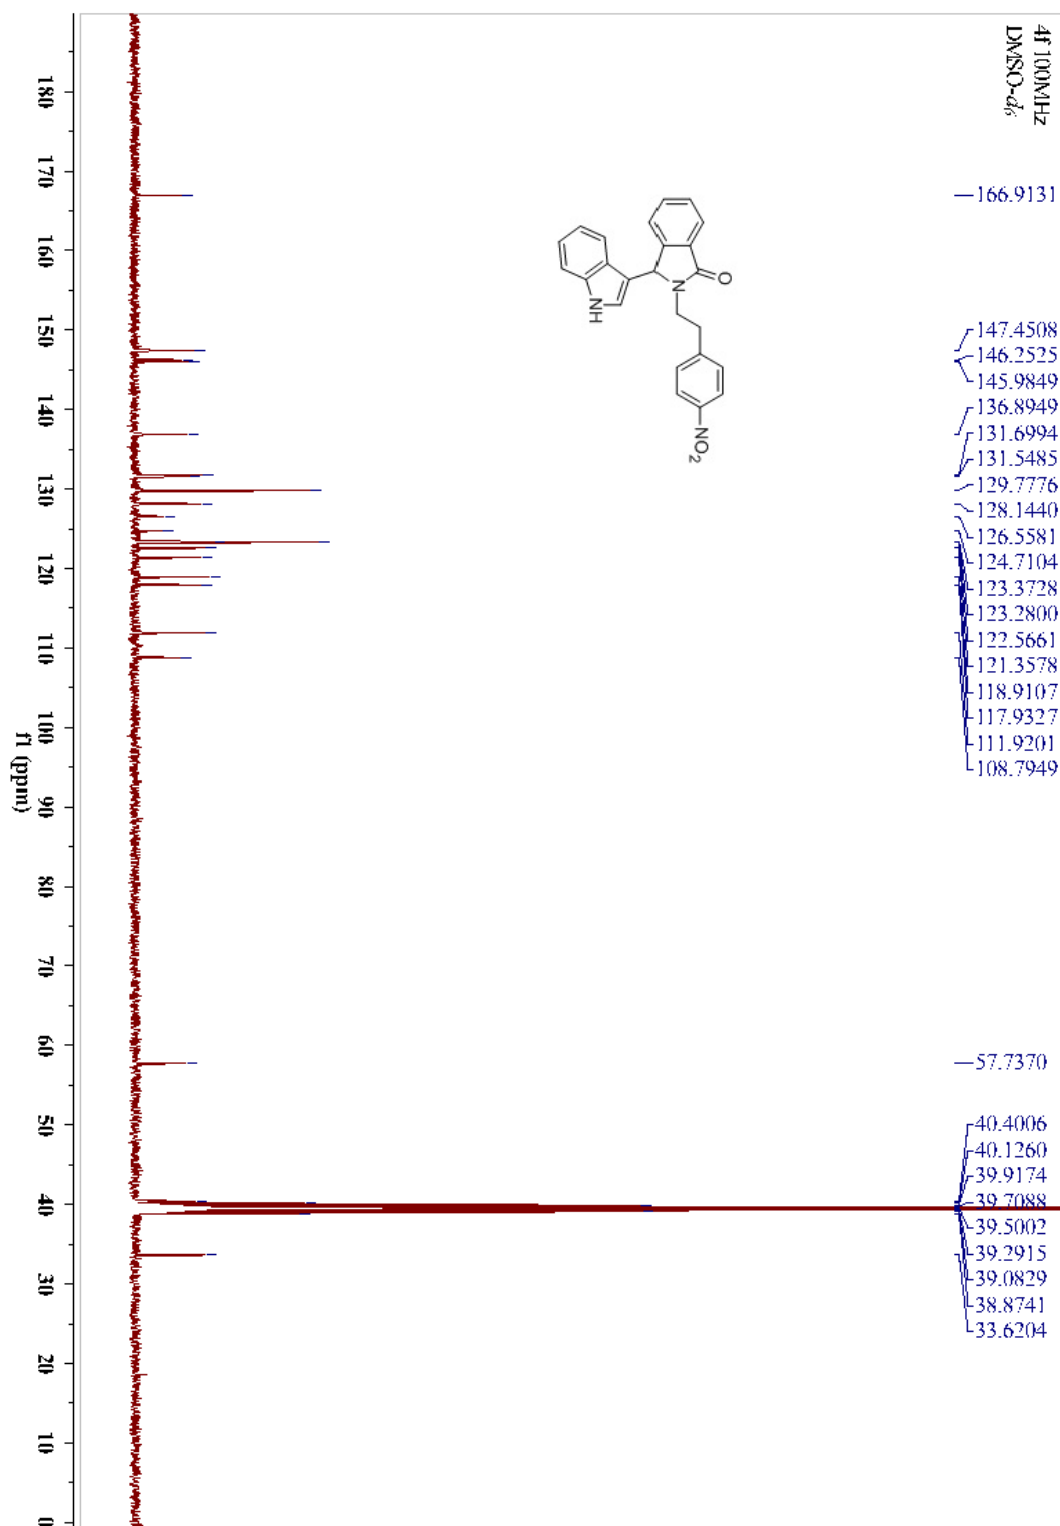

S19. LCMS spectrum of 2-(furan-2-ylmethyl)-3-(1*H*-indol-3-yl)isoindolin-1-one (**4g**).

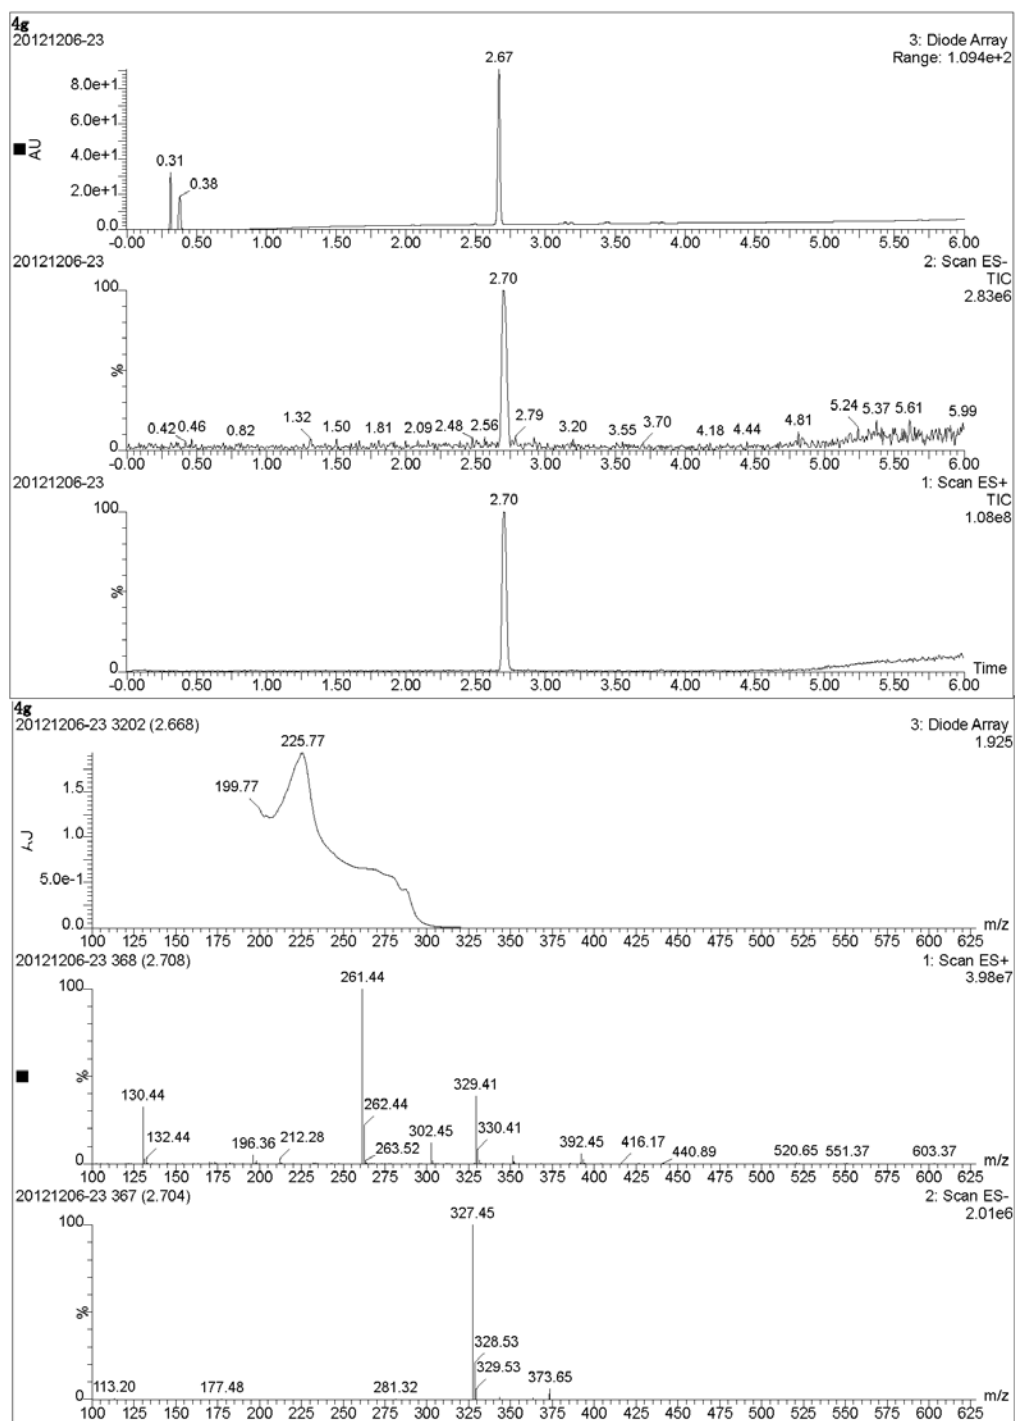

**S20.**  $^1\text{H}$  NMR spectrum of 2-(furan-2-ylmethyl)-3-(1*H*-indol-3-yl)isoindolin-1-one (**4g**)  
in  $\text{DMSO-}d_6$ .

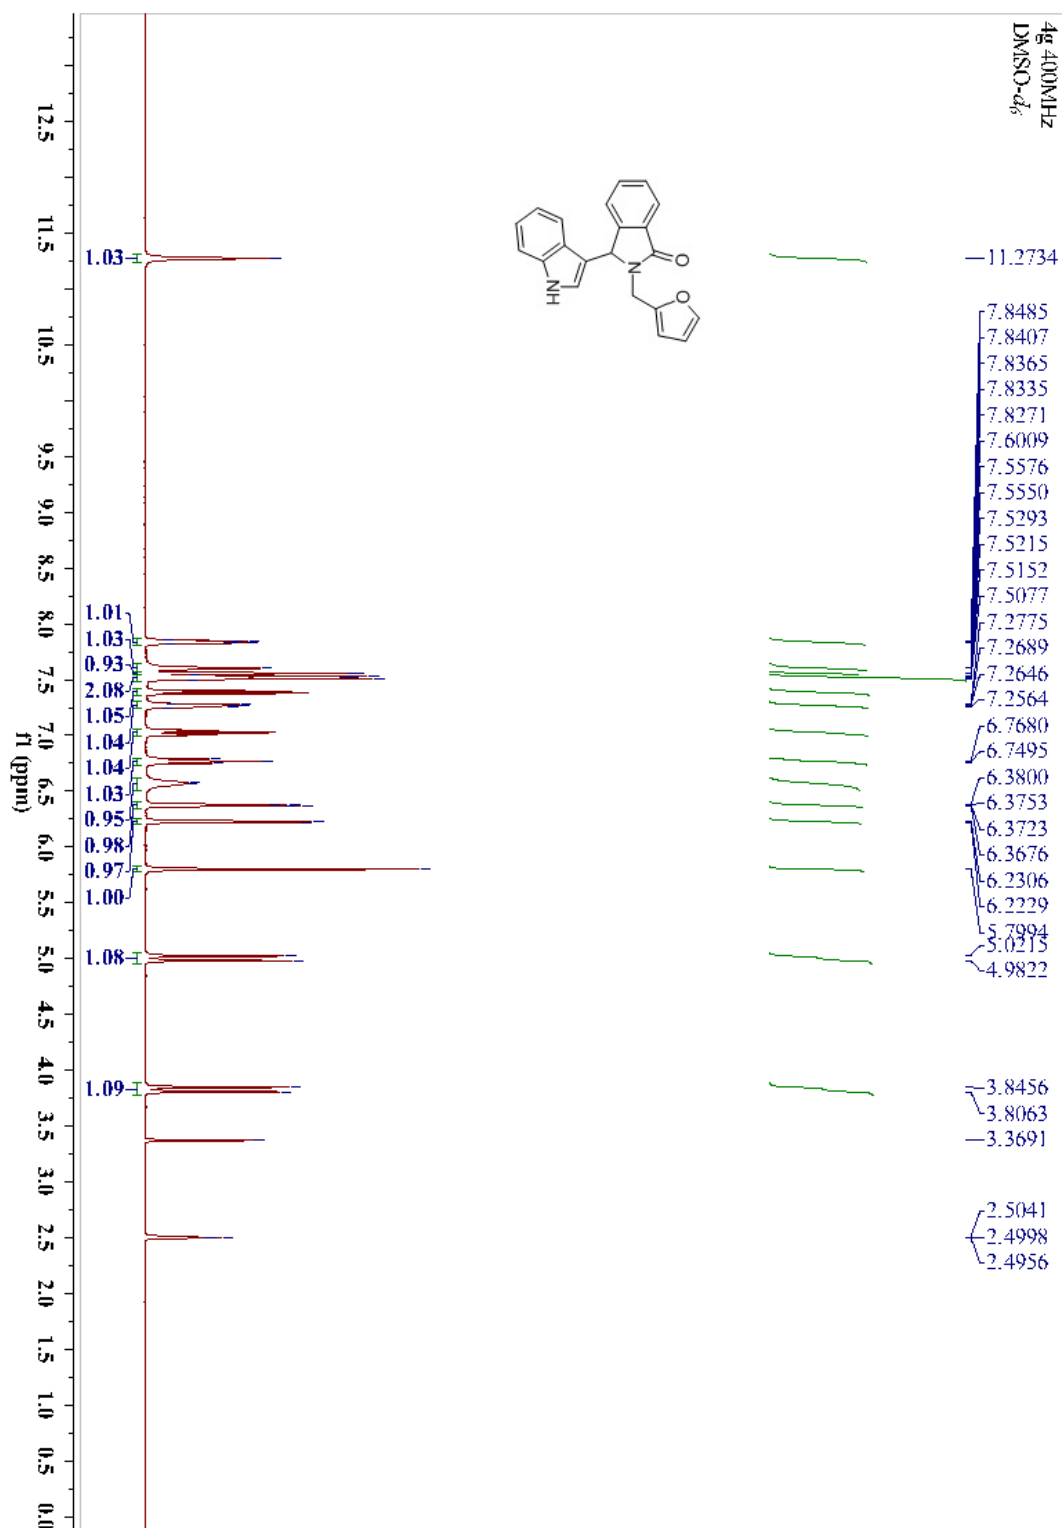

**S21.**  $^{13}\text{C}$  NMR spectrum of 2-(furan-2-ylmethyl)-3-(1*H*-indol-3-yl)isoindolin-1-one  
(**4g**) in  $\text{DMSO-}d_6$ .

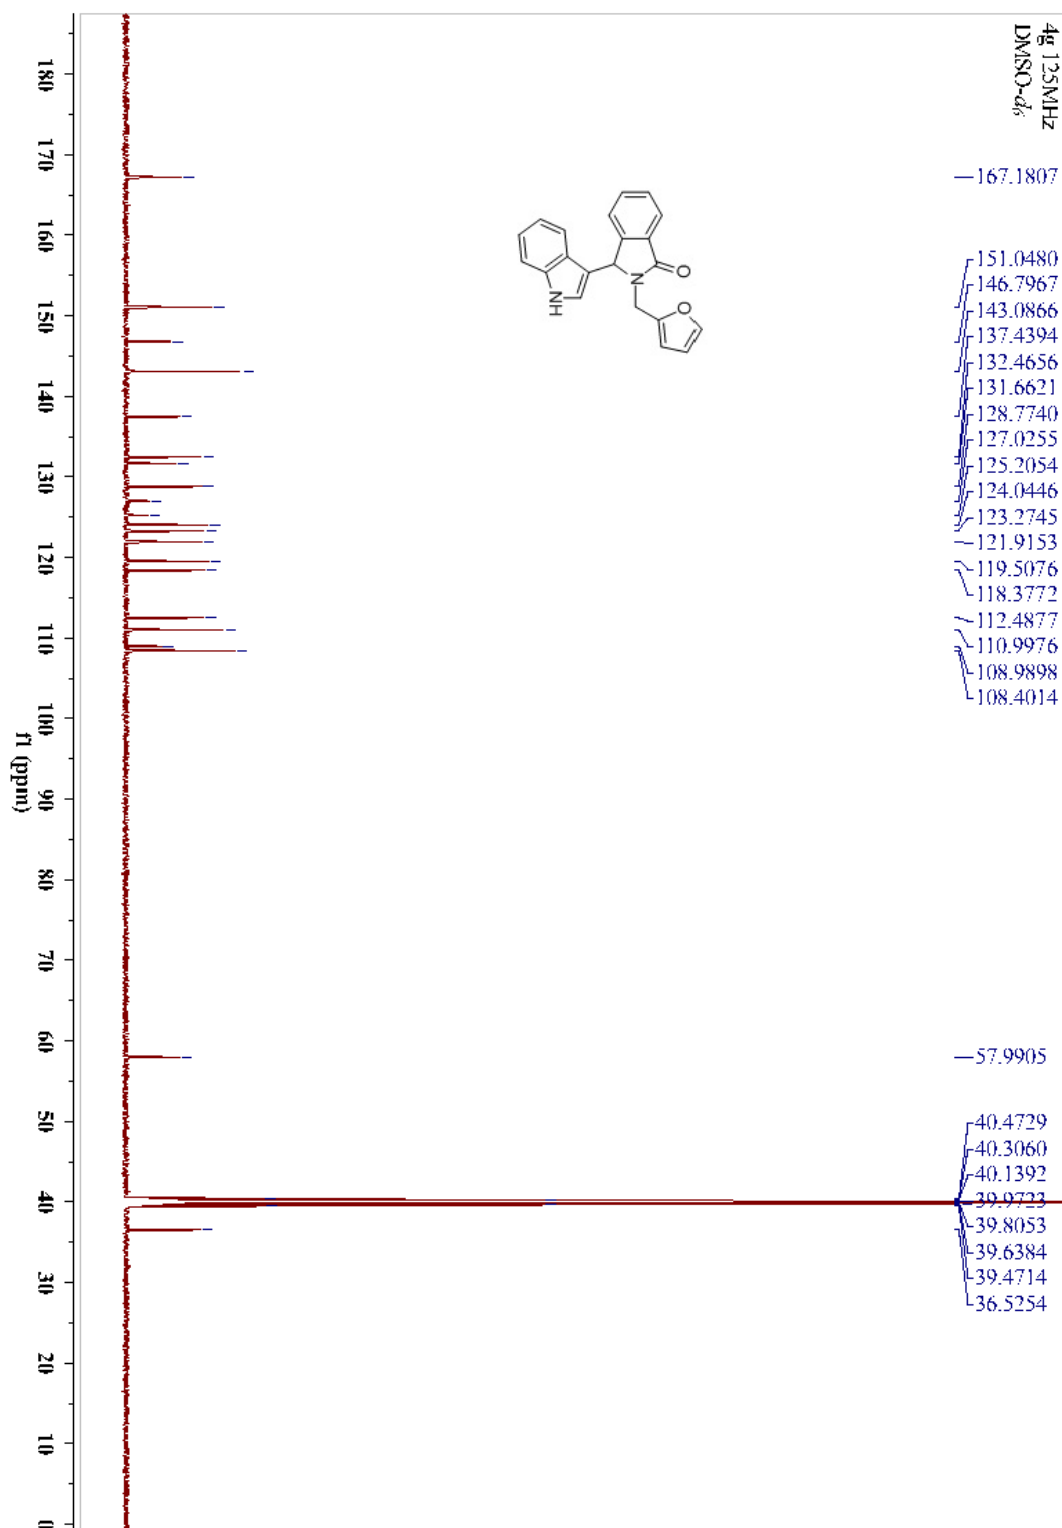

**S22.** LCMS spectrum of 3-(1*H*-indol-3-yl)-2-(pyridin-2-ylmethyl)isoindolin-1-one  
**(4h).**

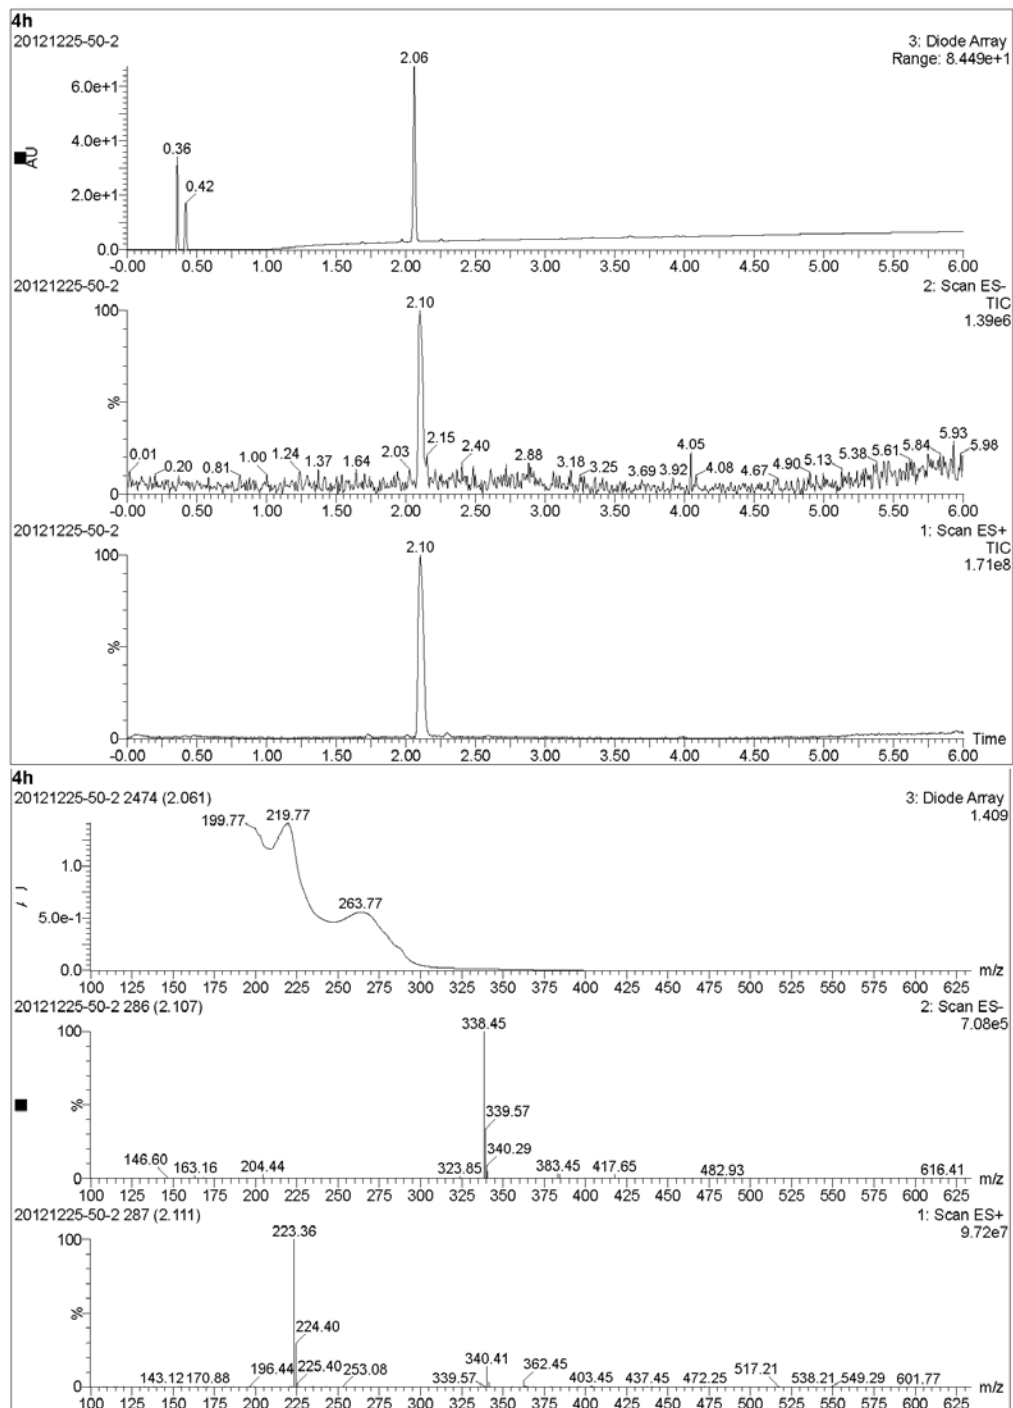

**S23.**  $^1\text{H}$  NMR spectrum of 3-(1*H*-indol-3-yl)-2-(pyridin-2-ylmethyl)isoindolin-1-one  
(**4h**) in  $\text{DMSO-}d_6$ .

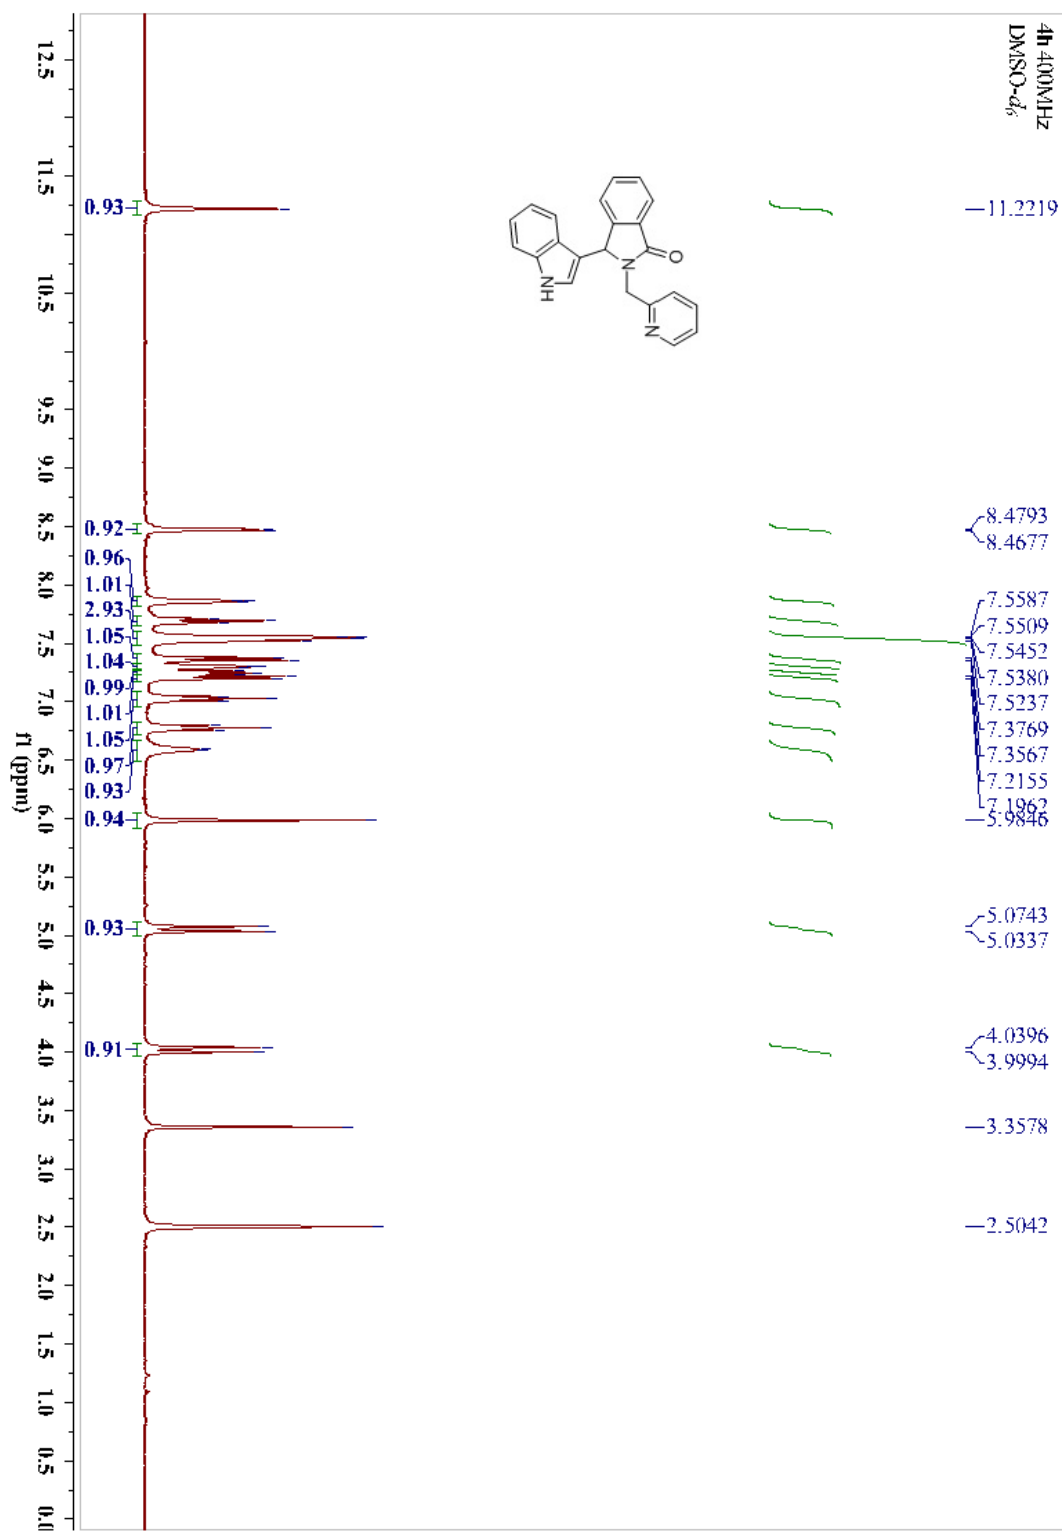

**S24.**  $^{13}\text{C}$  NMR spectrum of 3-(1*H*-indol-3-yl)-2-(pyridin-2-ylmethyl)isoindolin-1-one  
(**4h**) in  $\text{DMSO-}d_6$ .

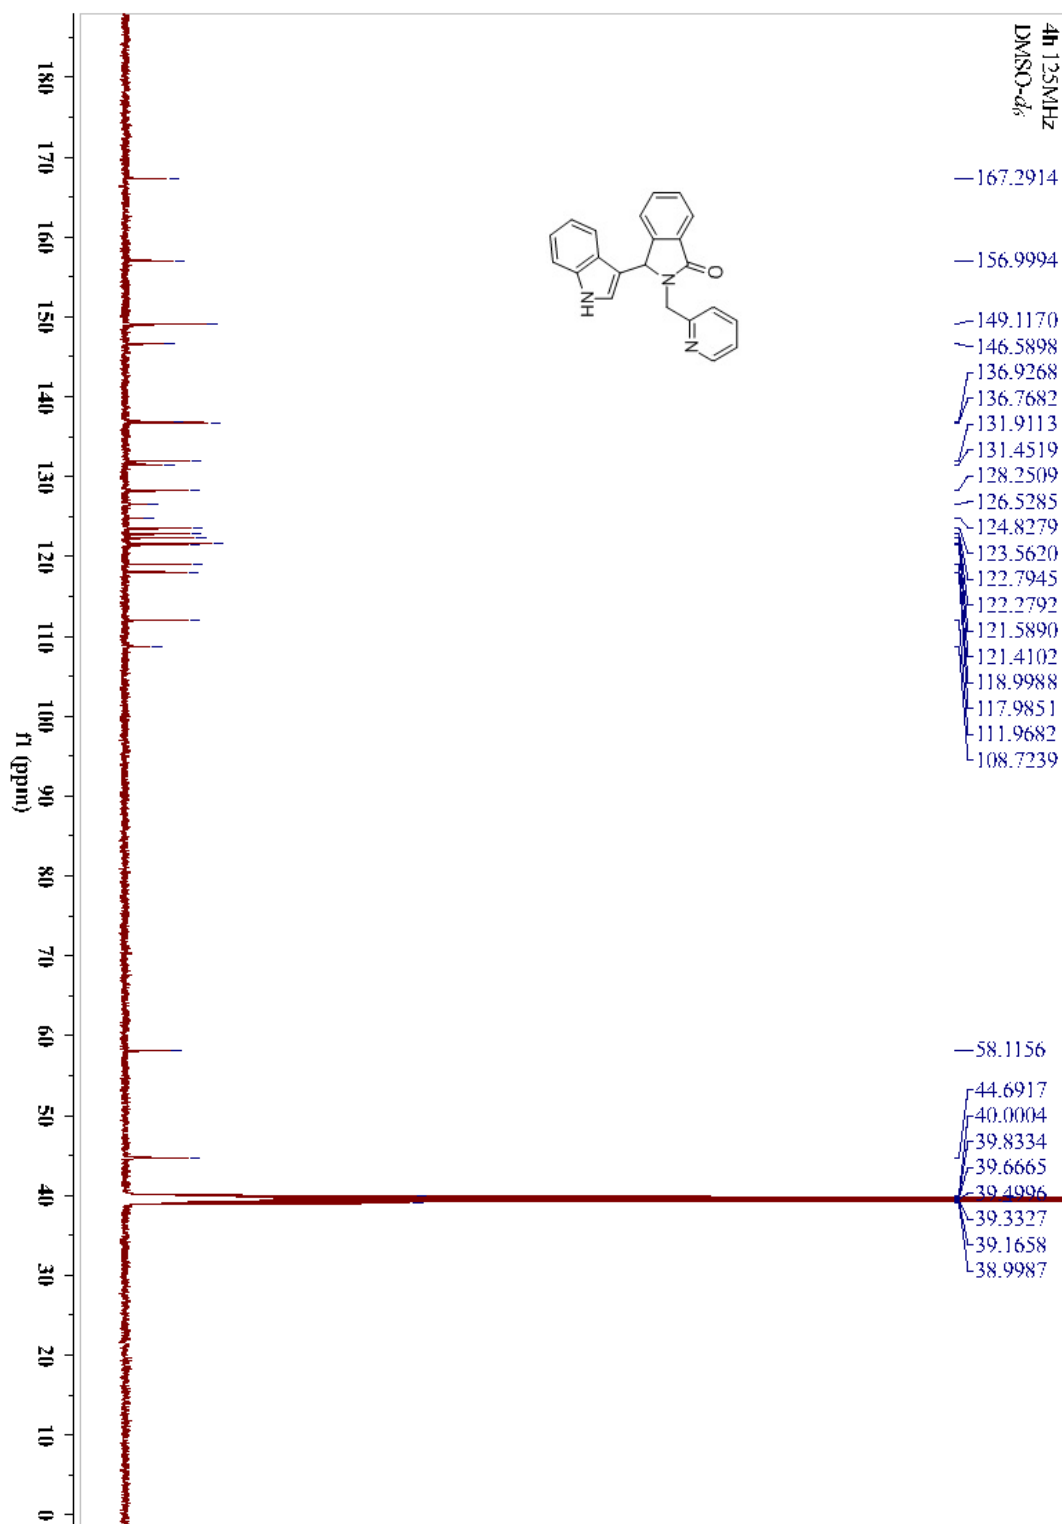



S25. LCMS spectrum of 3-(1*H*-Indol-3-yl)-2-phenylisoindolin-1-one (**4i**).

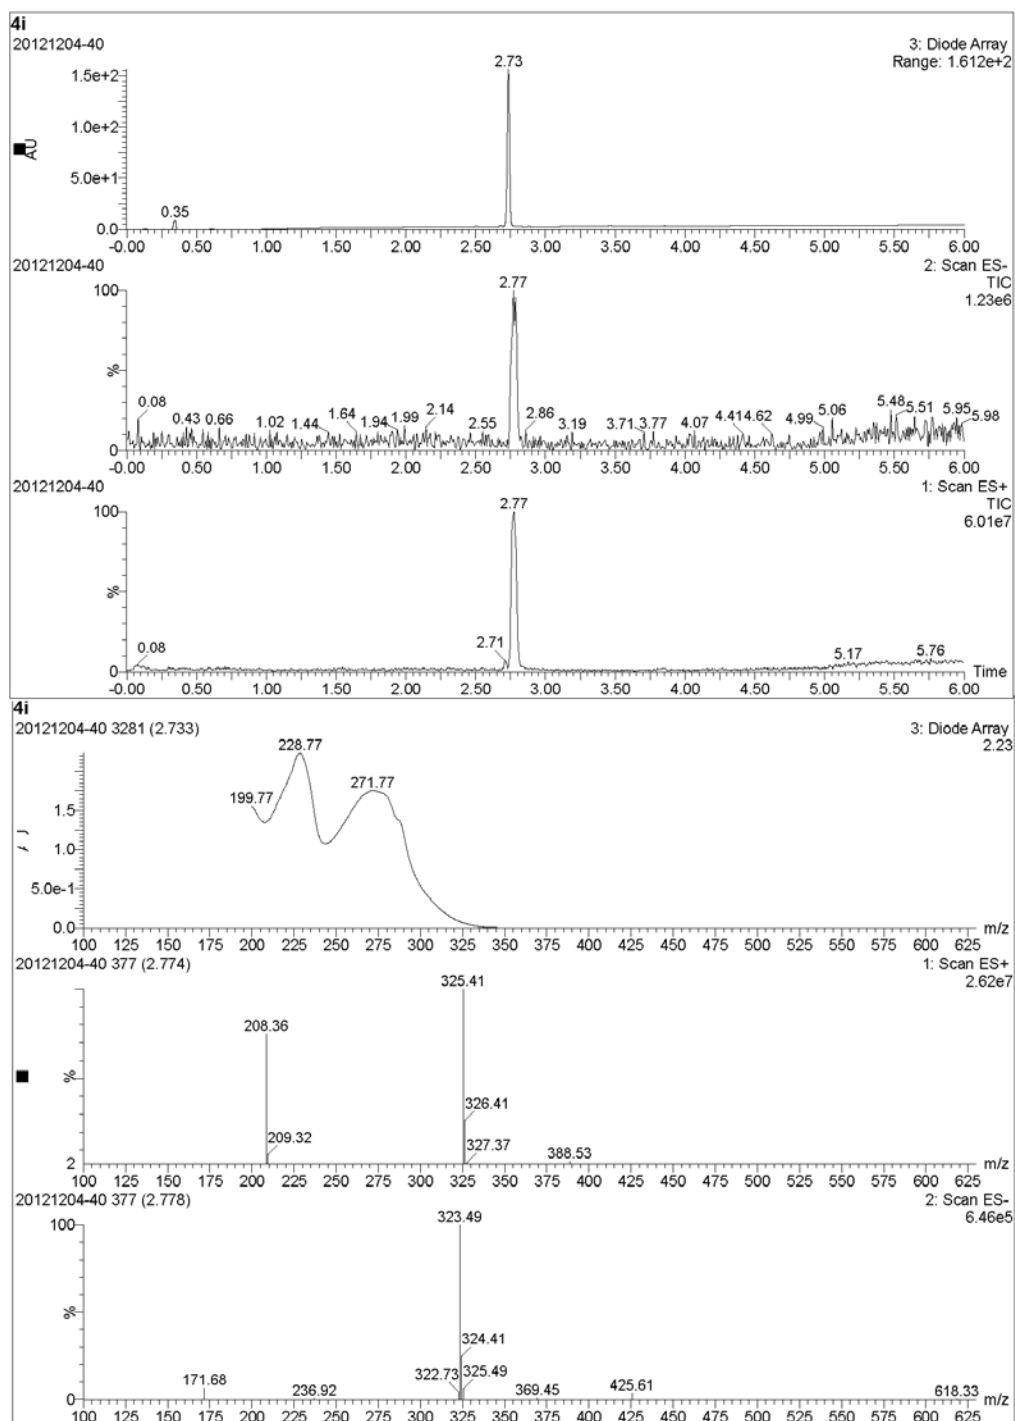

S26.  $^1\text{H}$  NMR spectrum of 3-(1*H*-Indol-3-yl)-2-phenylisoindolin-1-one (**4i**) in  $\text{DMSO-}d_6$ .

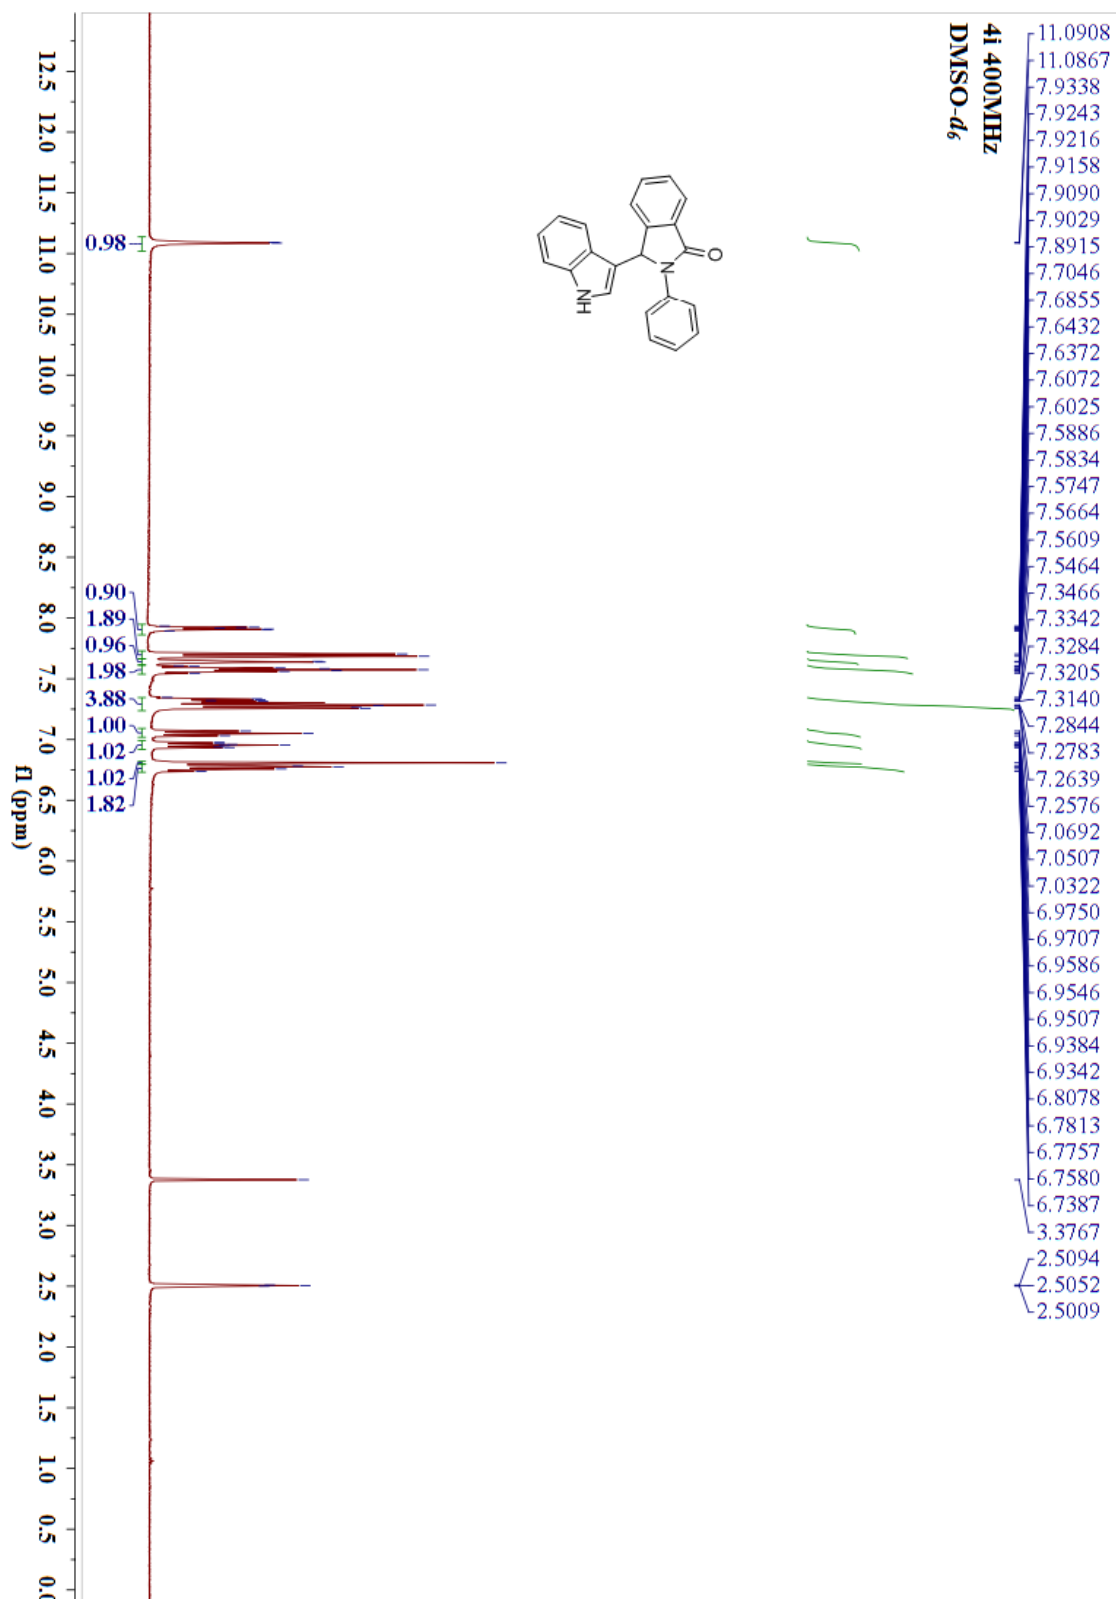

S27.  $^{13}\text{C}$  NMR spectrum of 3-(1*H*-Indol-3-yl)-2-phenylisoindolin-1-one (**4i**) in  $\text{DMSO-}d_6$ .

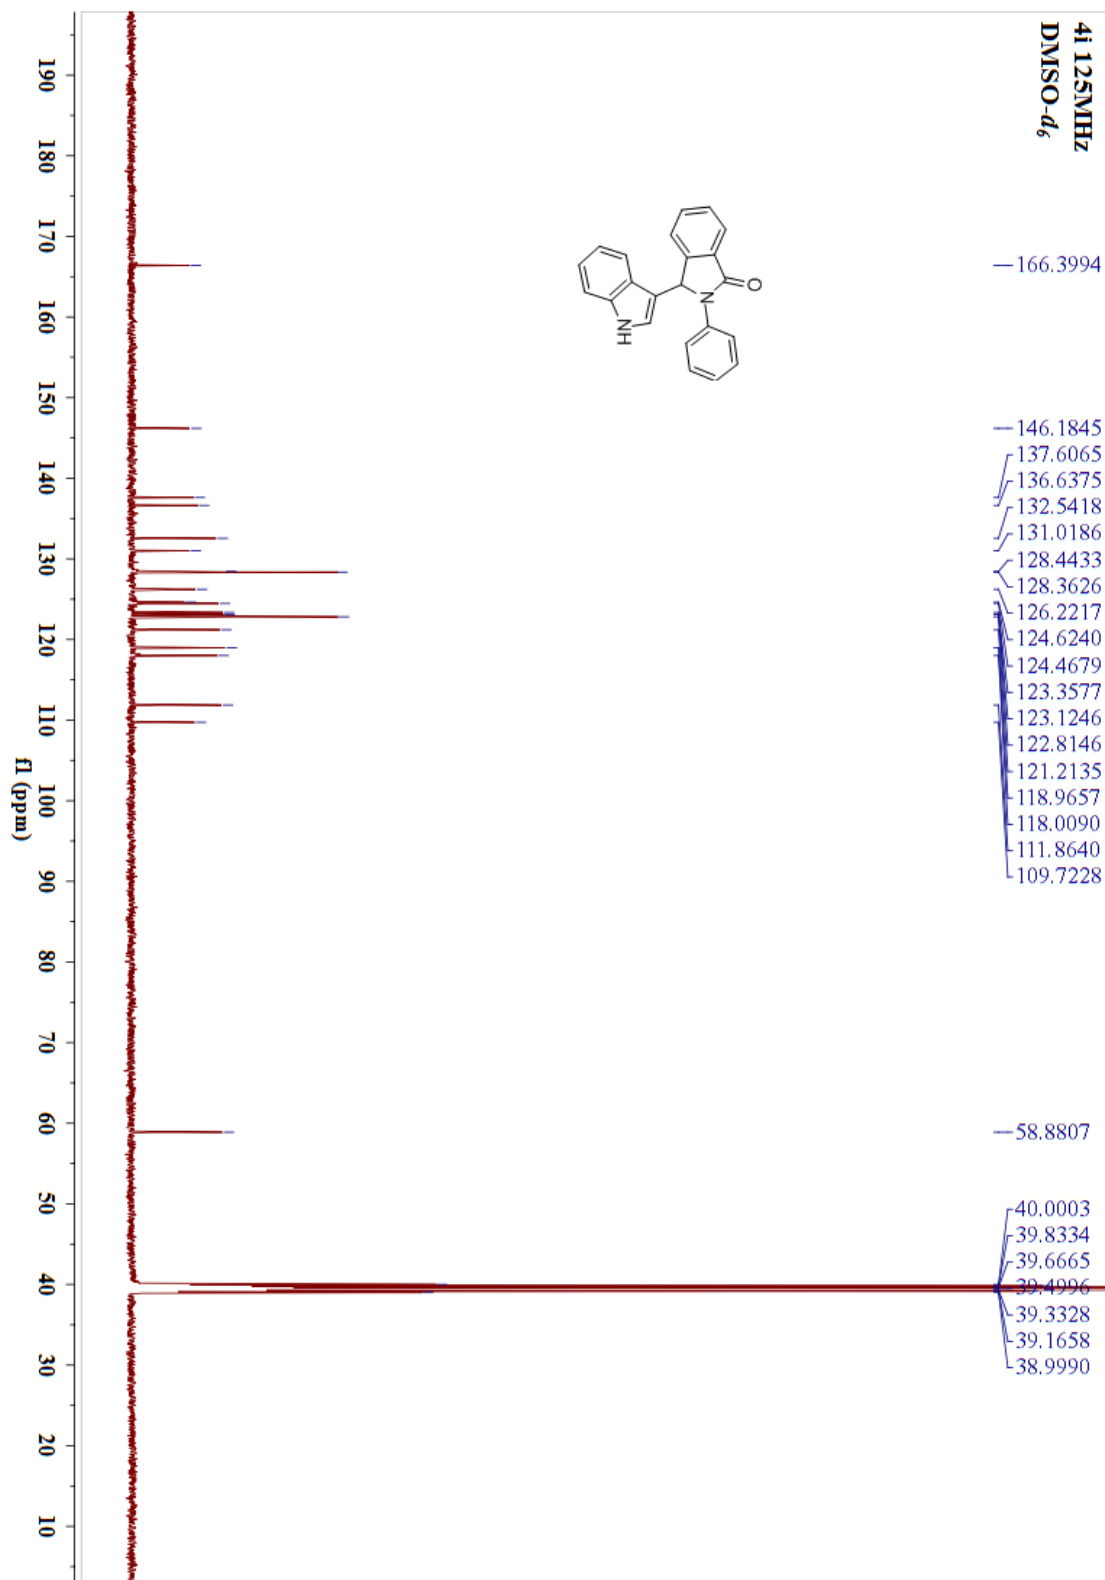

S28. LCMS spectrum of 3-(1*H*-indol-3-yl)-2-(4-methoxyphenyl)isoindolin-1-one (**4j**).

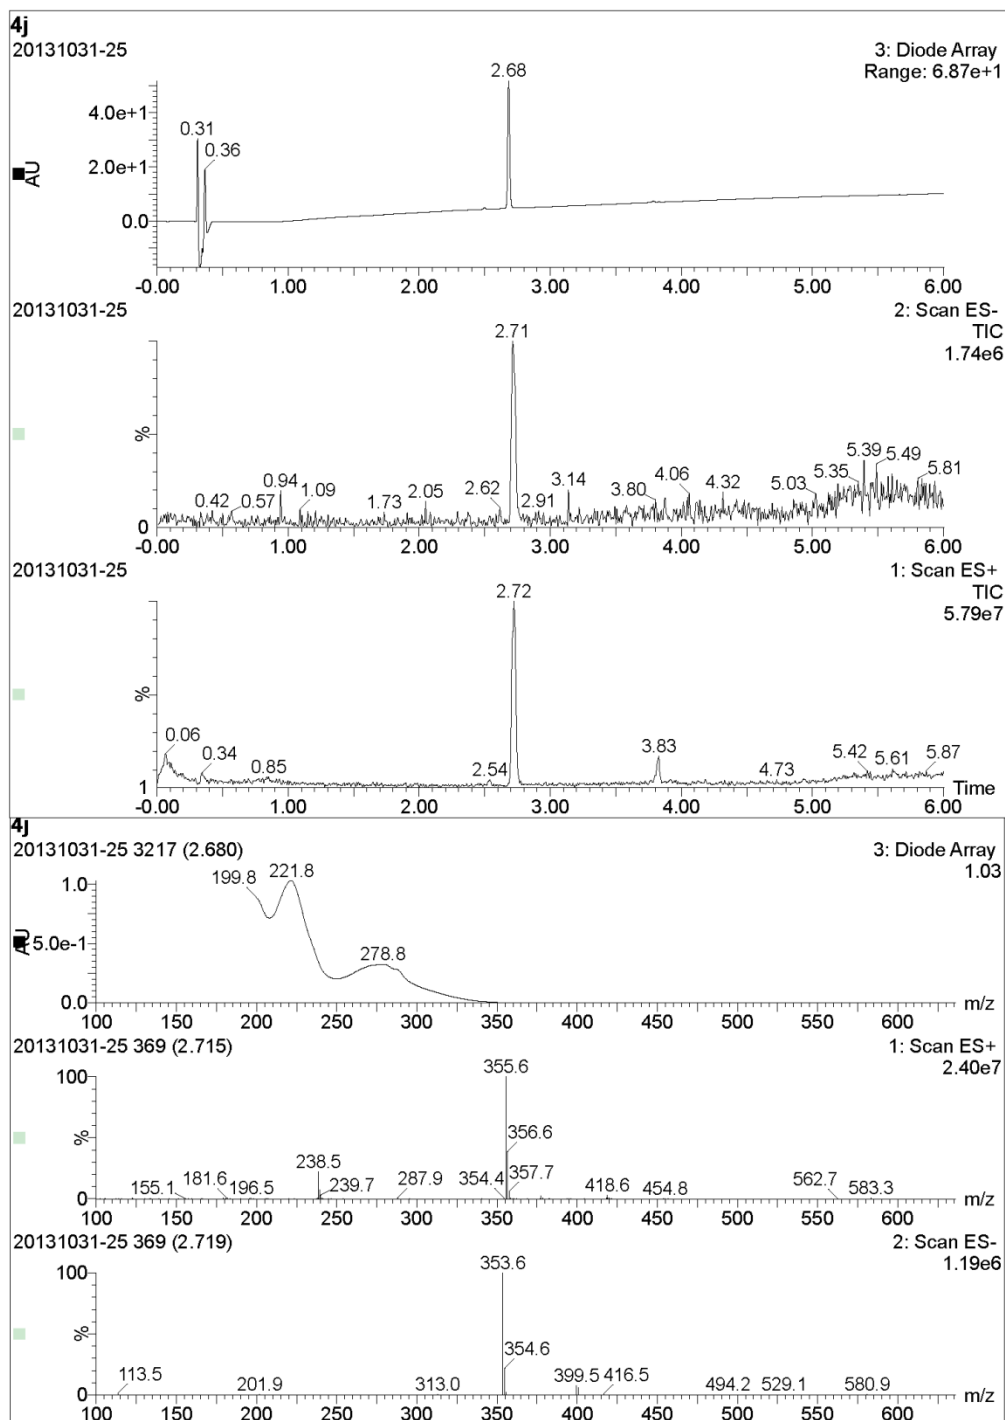

**S29.**  $^1\text{H}$  NMR spectrum of 3-(1*H*-indol-3-yl)-2-(4-methoxyphenyl)isoindolin-1-one (**4j**)  
in  $\text{DMSO-}d_6$ .

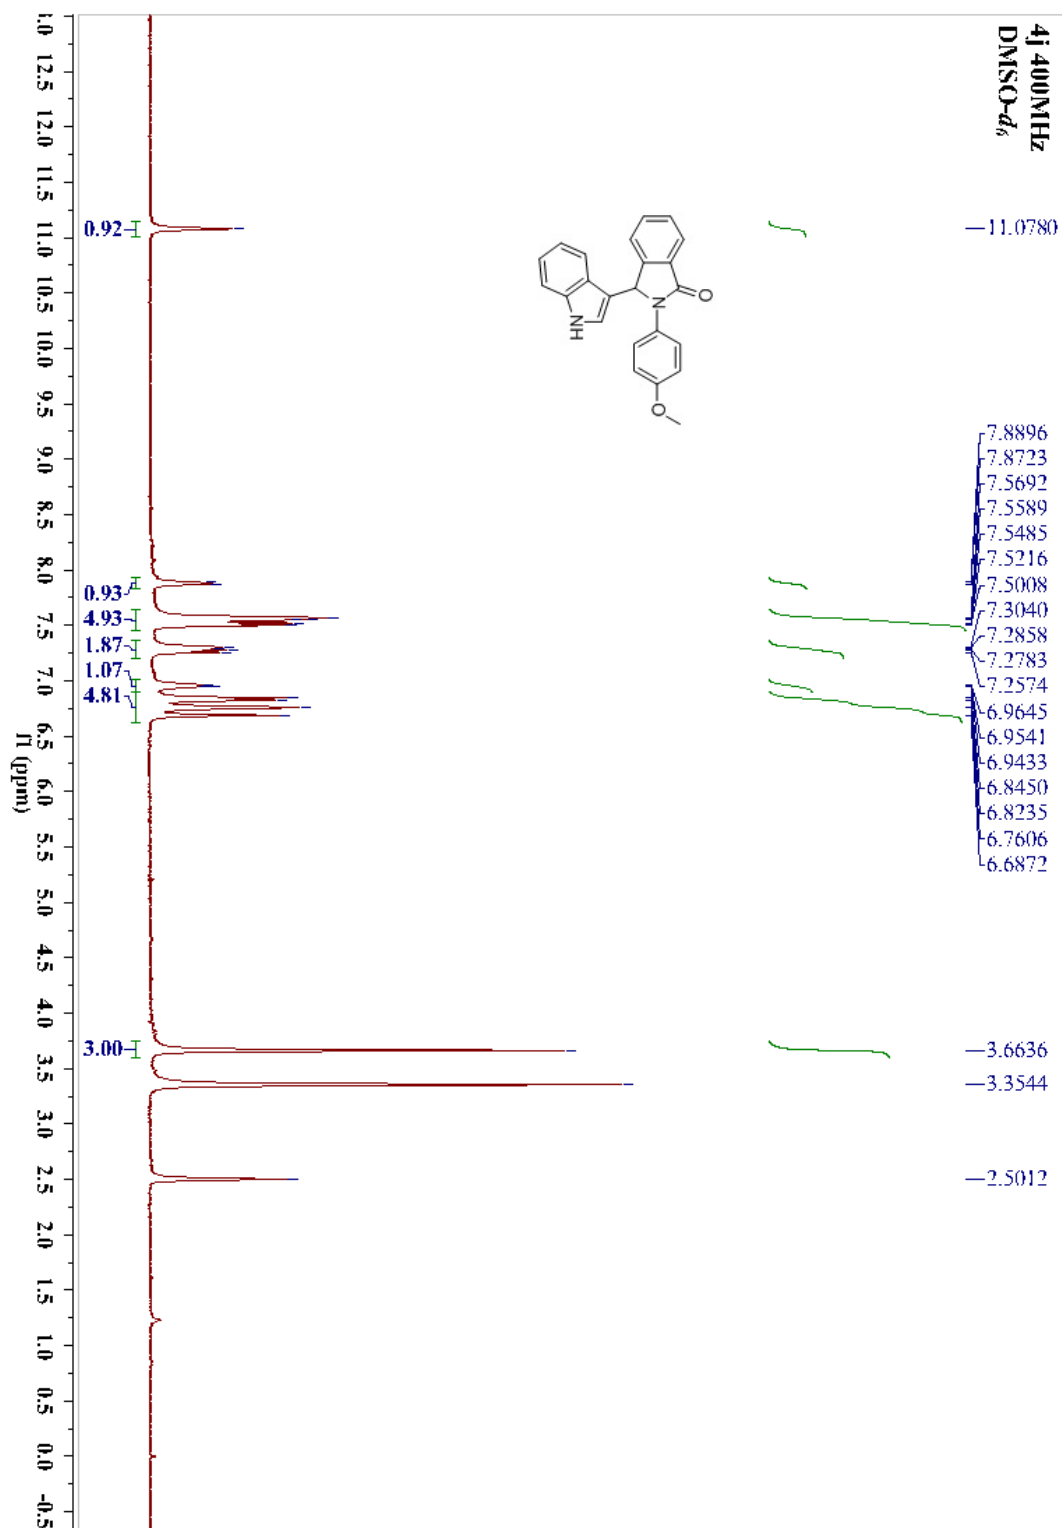

S30.  $^{13}\text{C}$  NMR spectrum of 3-(1*H*-indol-3-yl)-2-(4-methoxyphenyl)isoindolin-1-one (4j) in  $\text{DMSO-}d_6$ .

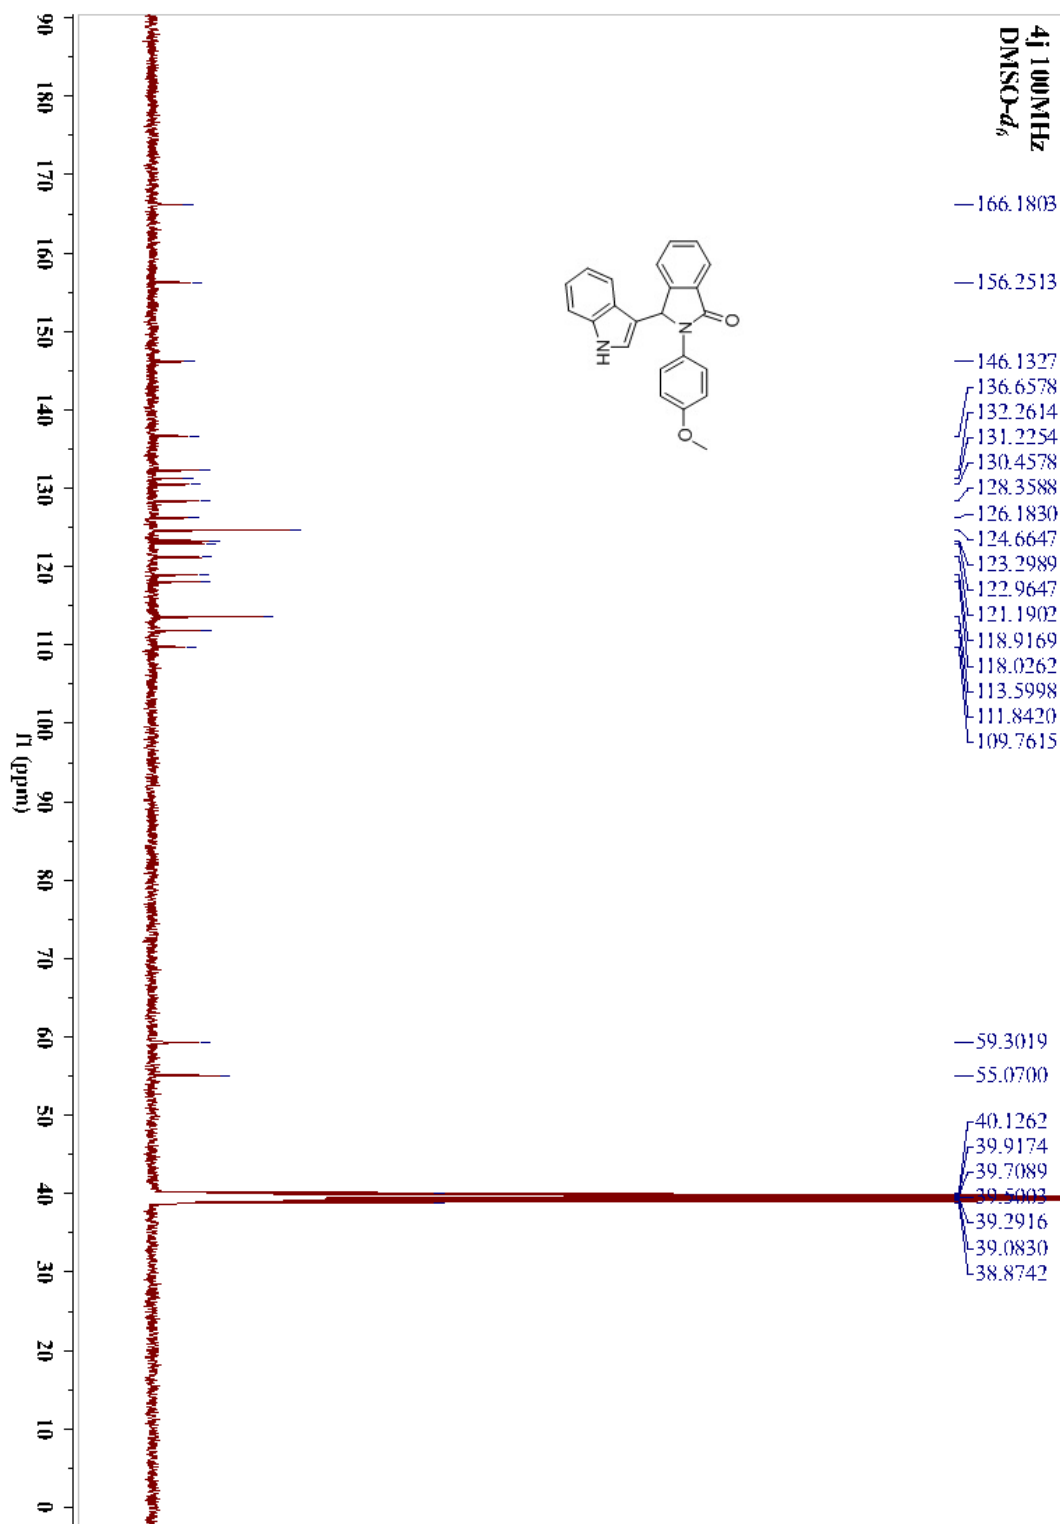

**S31.** LCMS spectrum of 3-(1*H*-indol-3-yl)-2-(*p*-tolyl)isoindolin-1-one (**4k**).

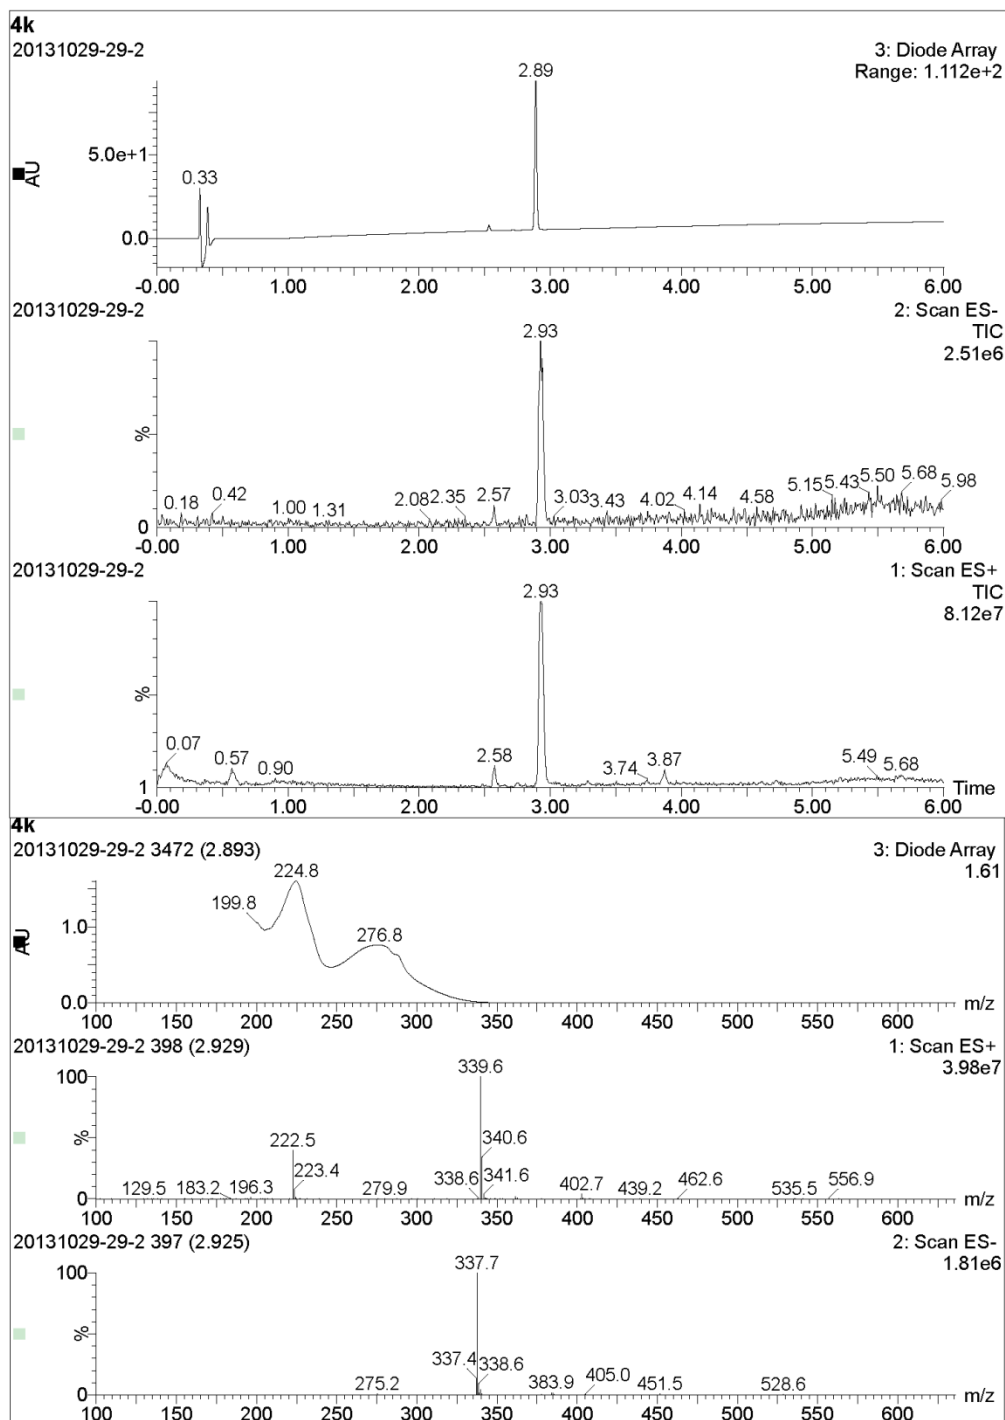

S32.  $^1\text{H}$  NMR spectrum of 3-(1*H*-indol-3-yl)-2-(*p*-tolyl)isoindolin-1-one (**4k**) in  $\text{DMSO-}d_6$ .

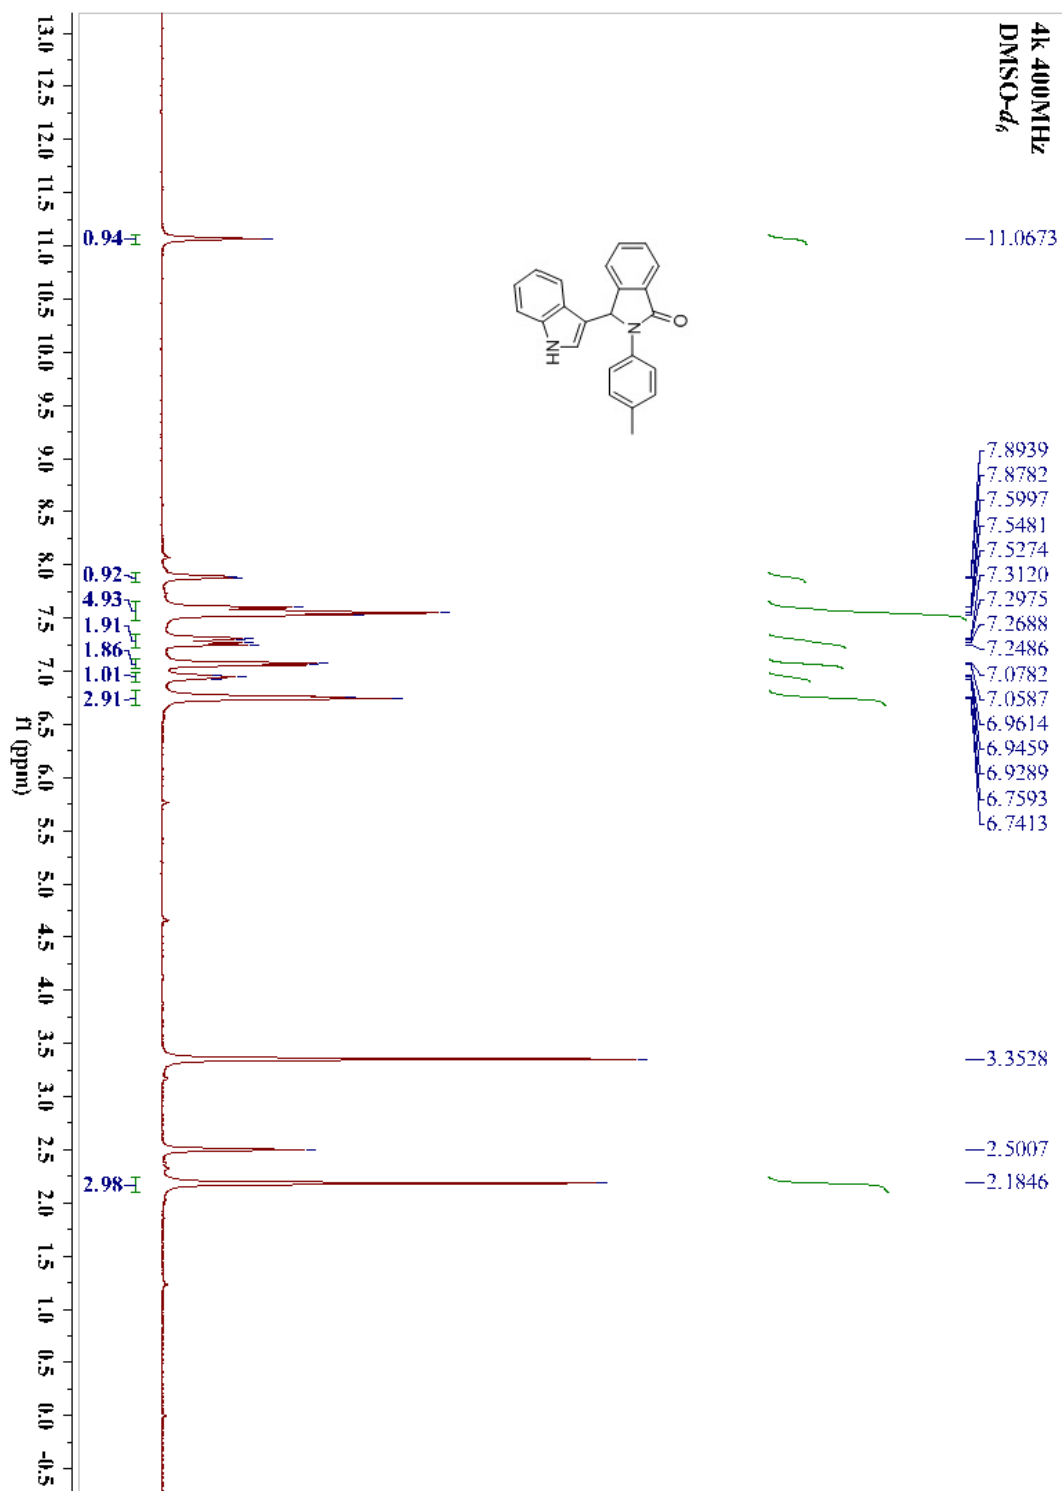



S33.  $^{13}\text{C}$  NMR spectrum of 3-(1*H*-indol-3-yl)-2-(*p*-tolyl)isoindolin-1-one (**4k**) in  $\text{DMSO-}d_6$ .

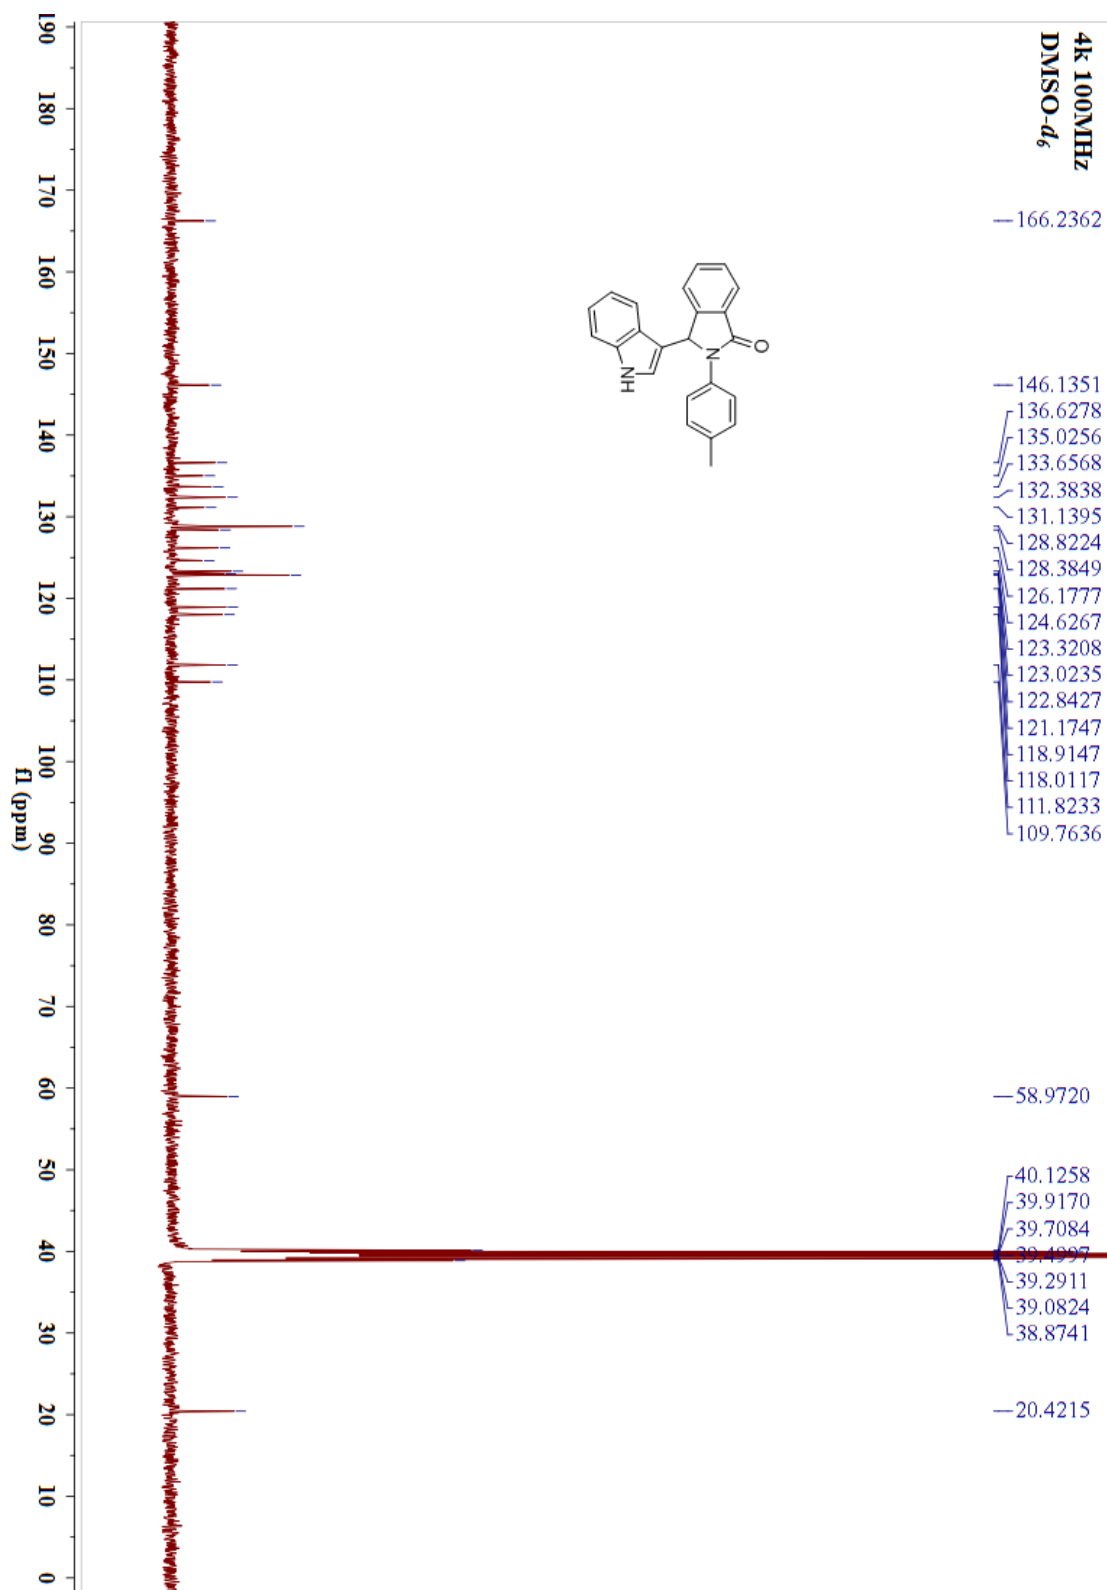

**S34. LCMS spectrum of 2-(4-chlorophenyl)-3-(1*H*-indol-3-yl)isoindolin-1-one (**4I**).**

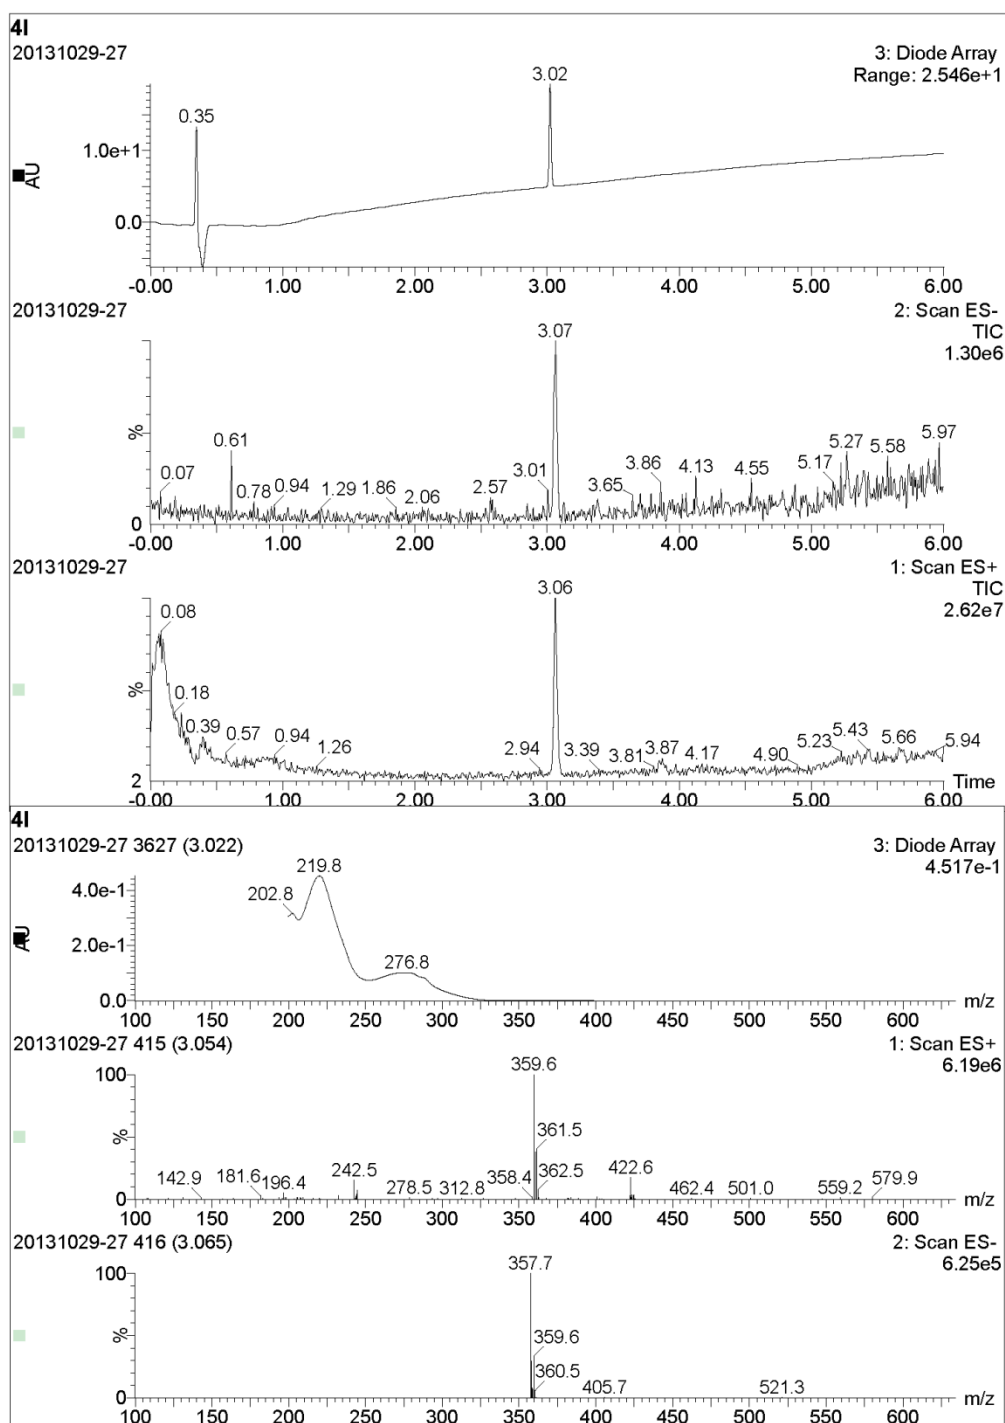

S35.  $^1\text{H}$  NMR spectrum of 2-(4-chlorophenyl)-3-(1*H*-indol-3-yl)isoindolin-1-one (**4I**),  
in  $\text{DMSO-}d_6$ .

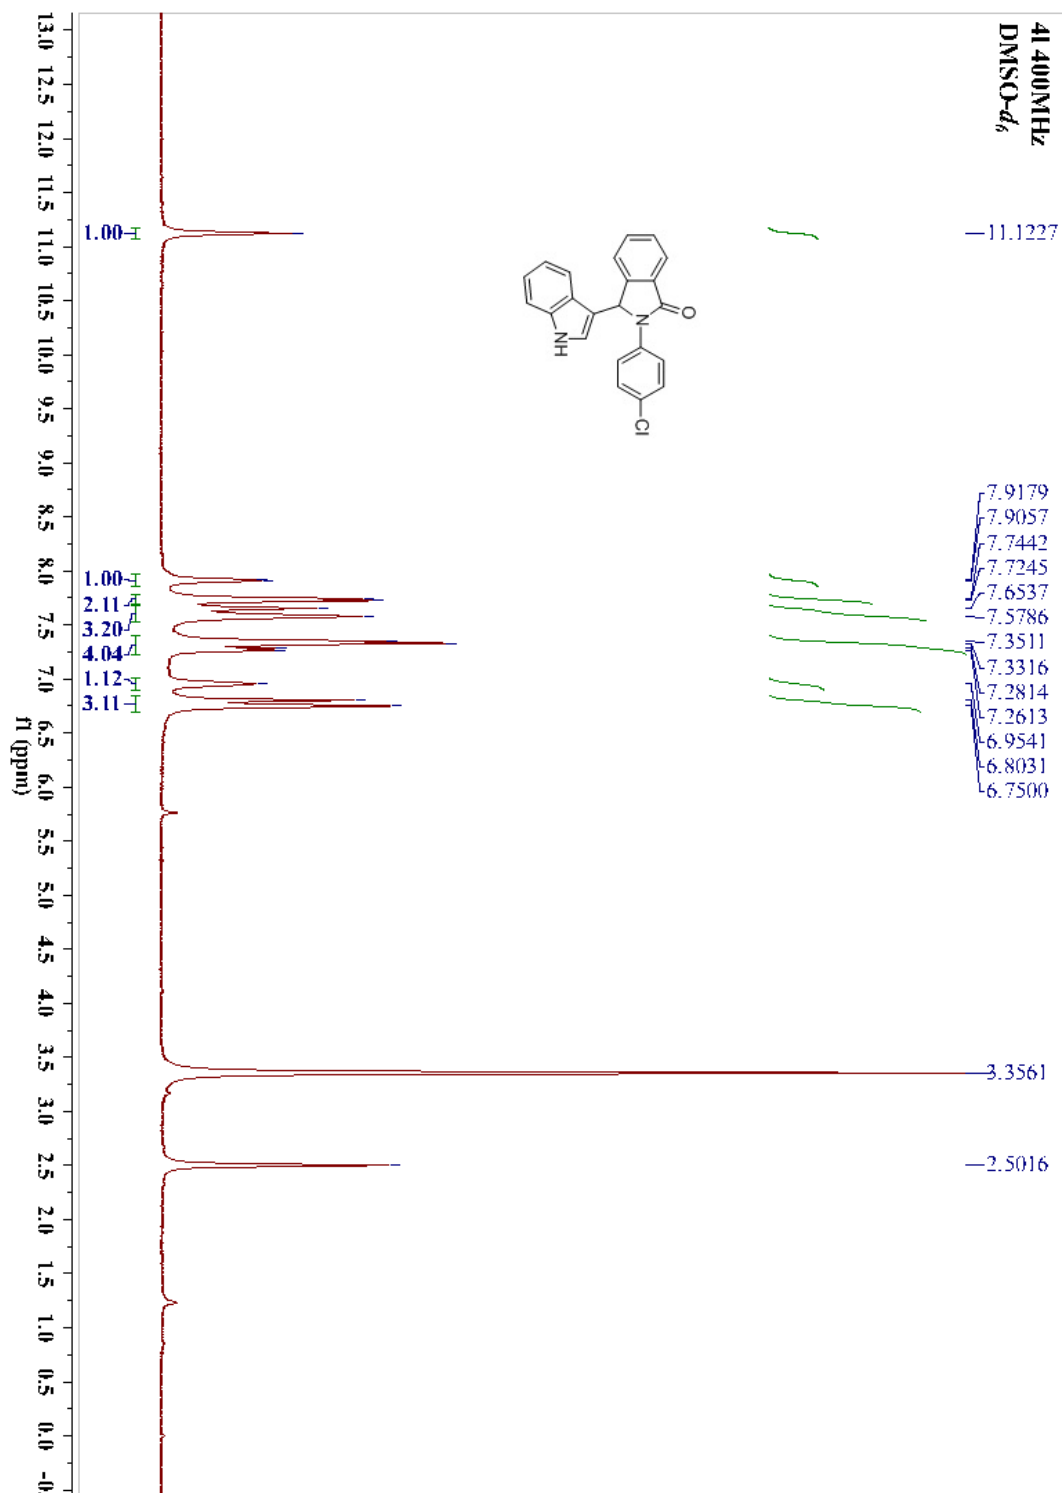

**S36.**  $^{13}\text{C}$  NMR spectrum of 2-(4-chlorophenyl)-3-(1H-indol-3-yl)isoindolin-1-one (**4I**),  
in  $\text{DMSO-}d_6$ .

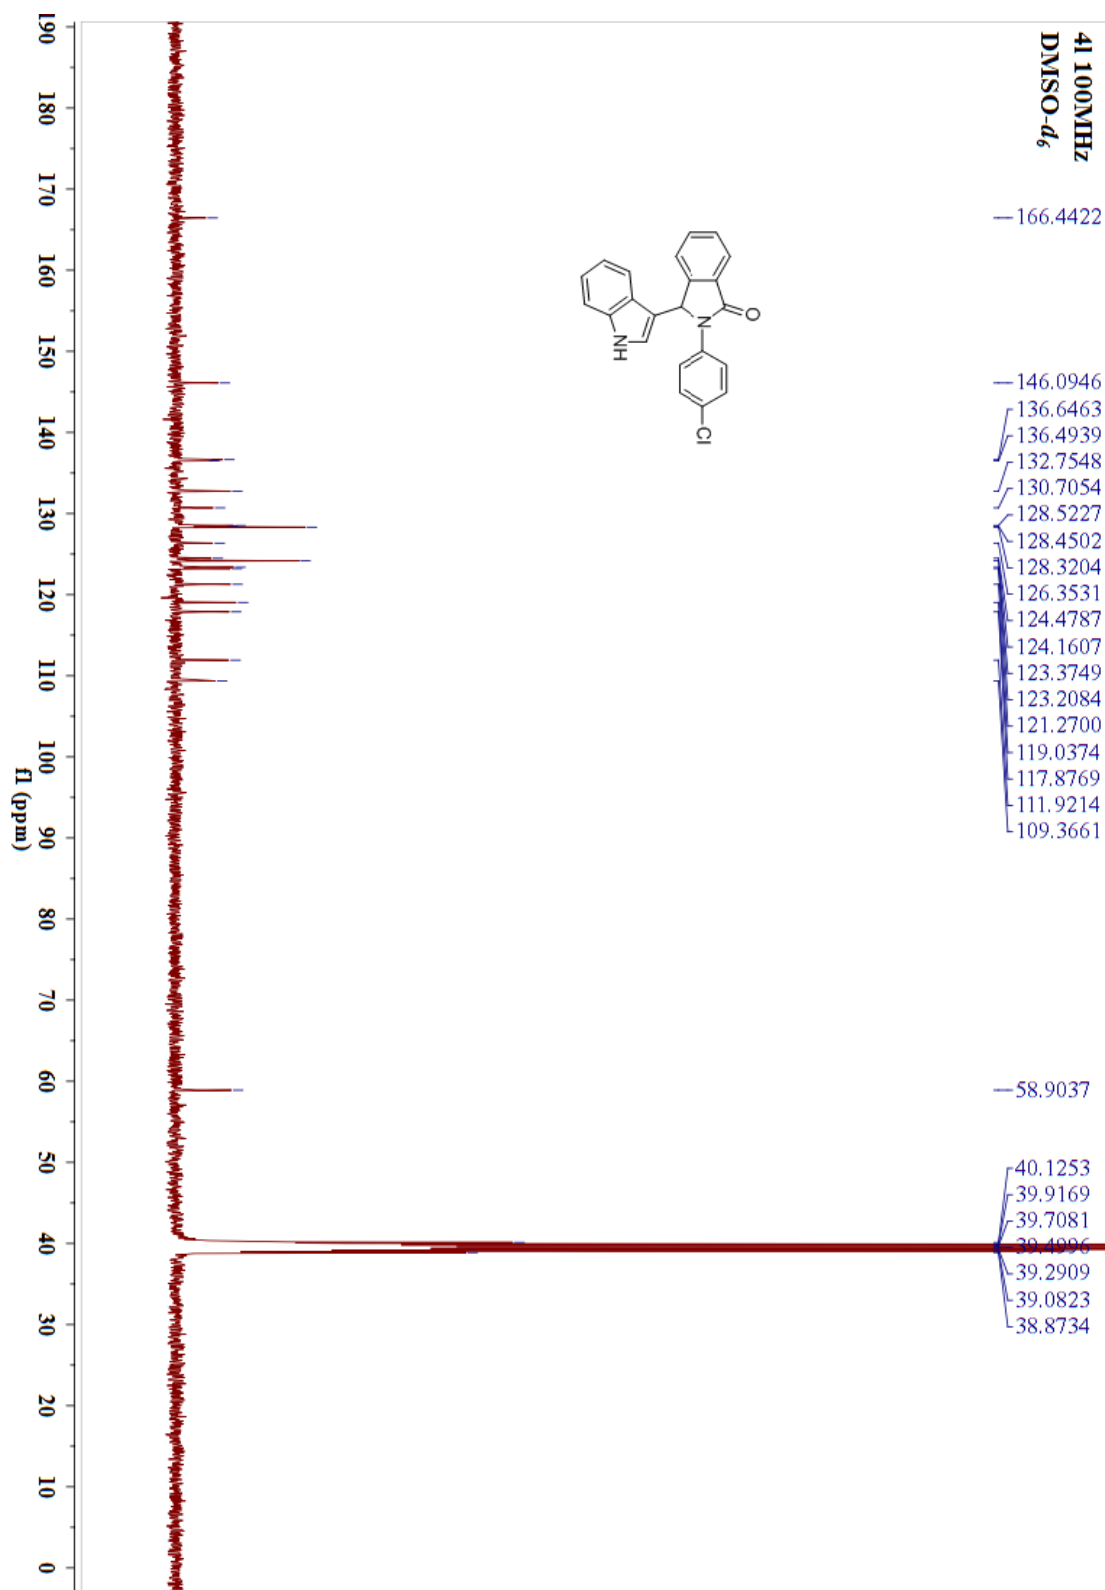

S37. LCMS spectrum of 3-(1*H*-indol-3-yl)isobenzofuran-1(3*H*)-one (5).

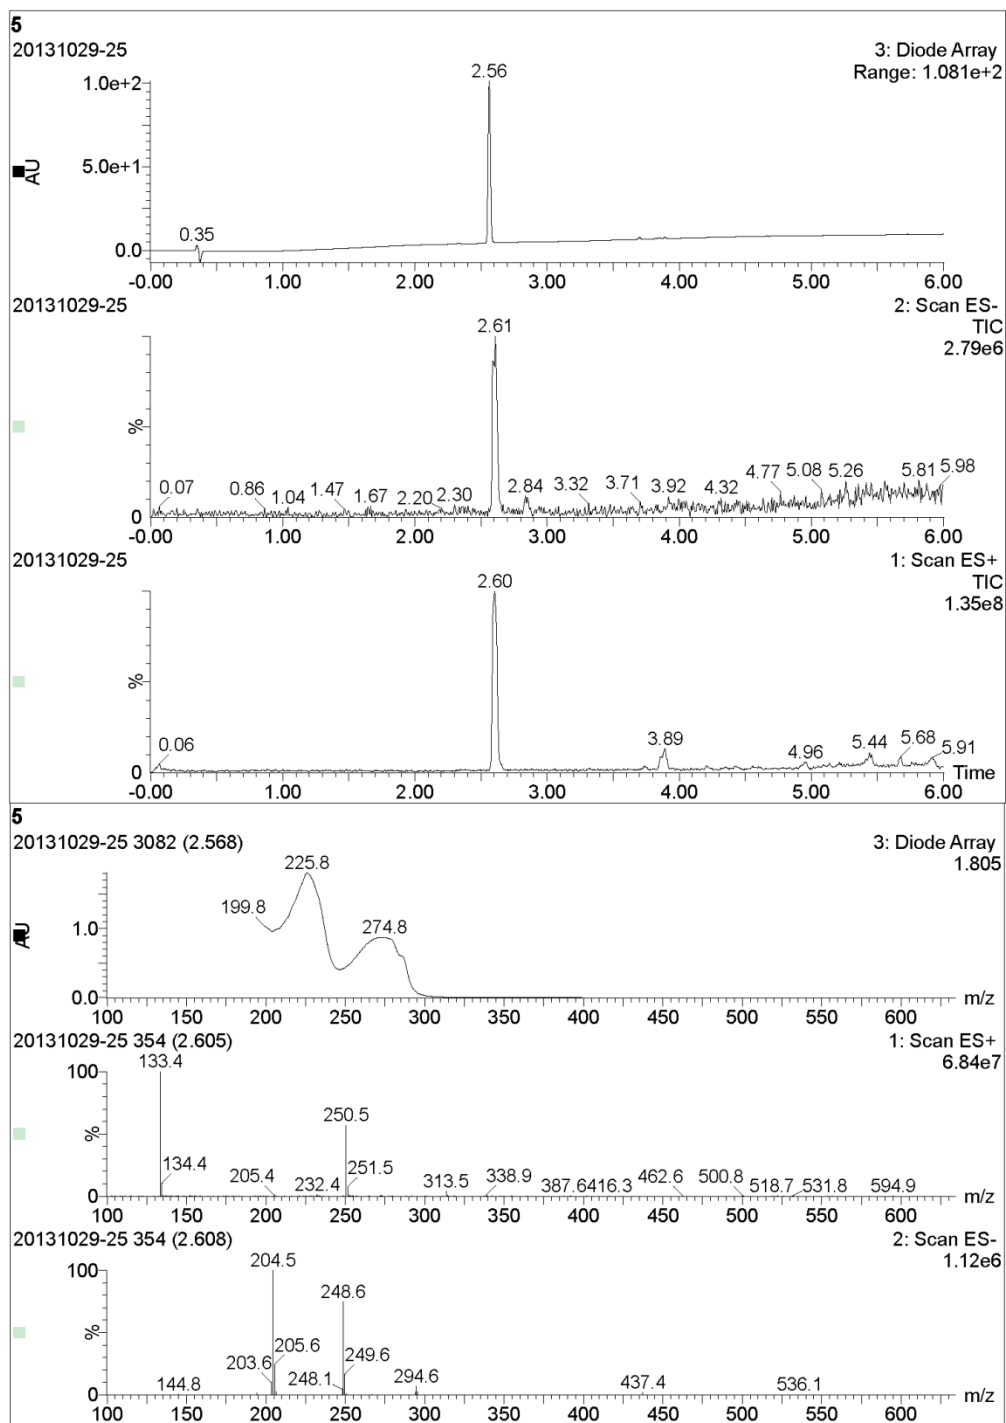

S38.  $^1\text{H}$  NMR spectrum of 3-(1*H*-indol-3-yl)isobenzofuran-1(3*H*)-one (**5**) in  $\text{DMSO-}d_6$ .

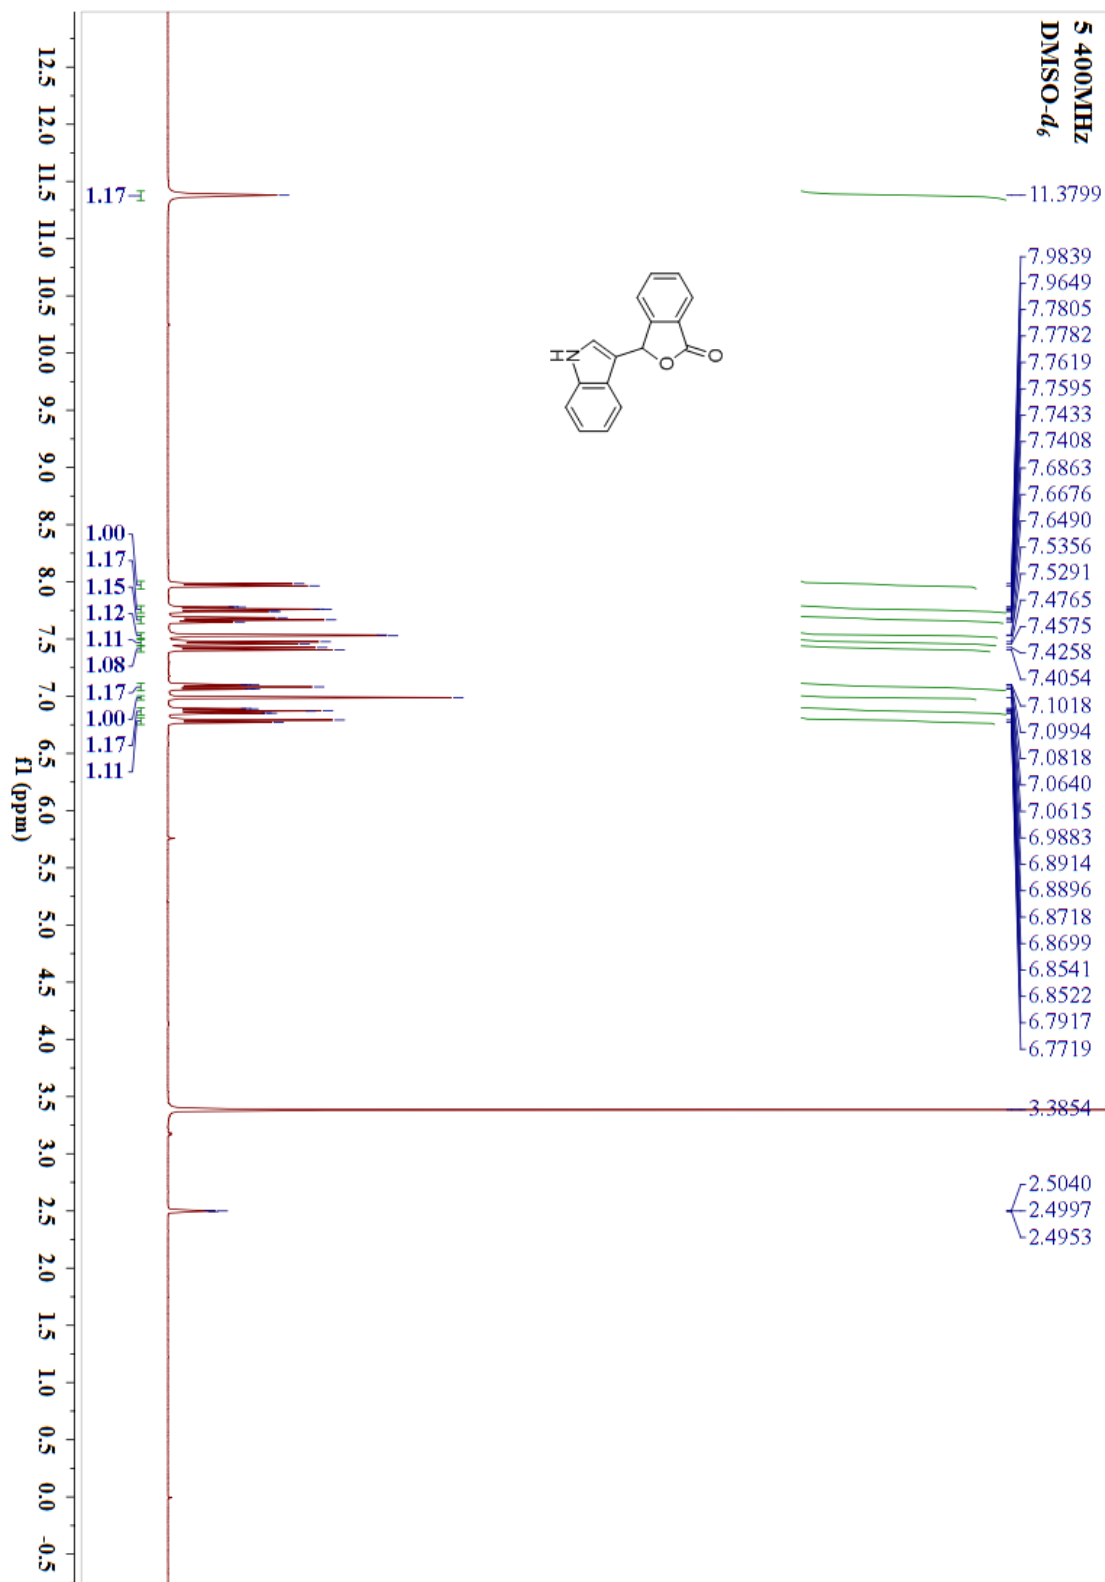

S39.  $^{13}\text{C}$  NMR spectrum of 3-(1*H*-indol-3-yl)isobenzofuran-1(3*H*)-one (**5**) in DMSO- $d_6$ .

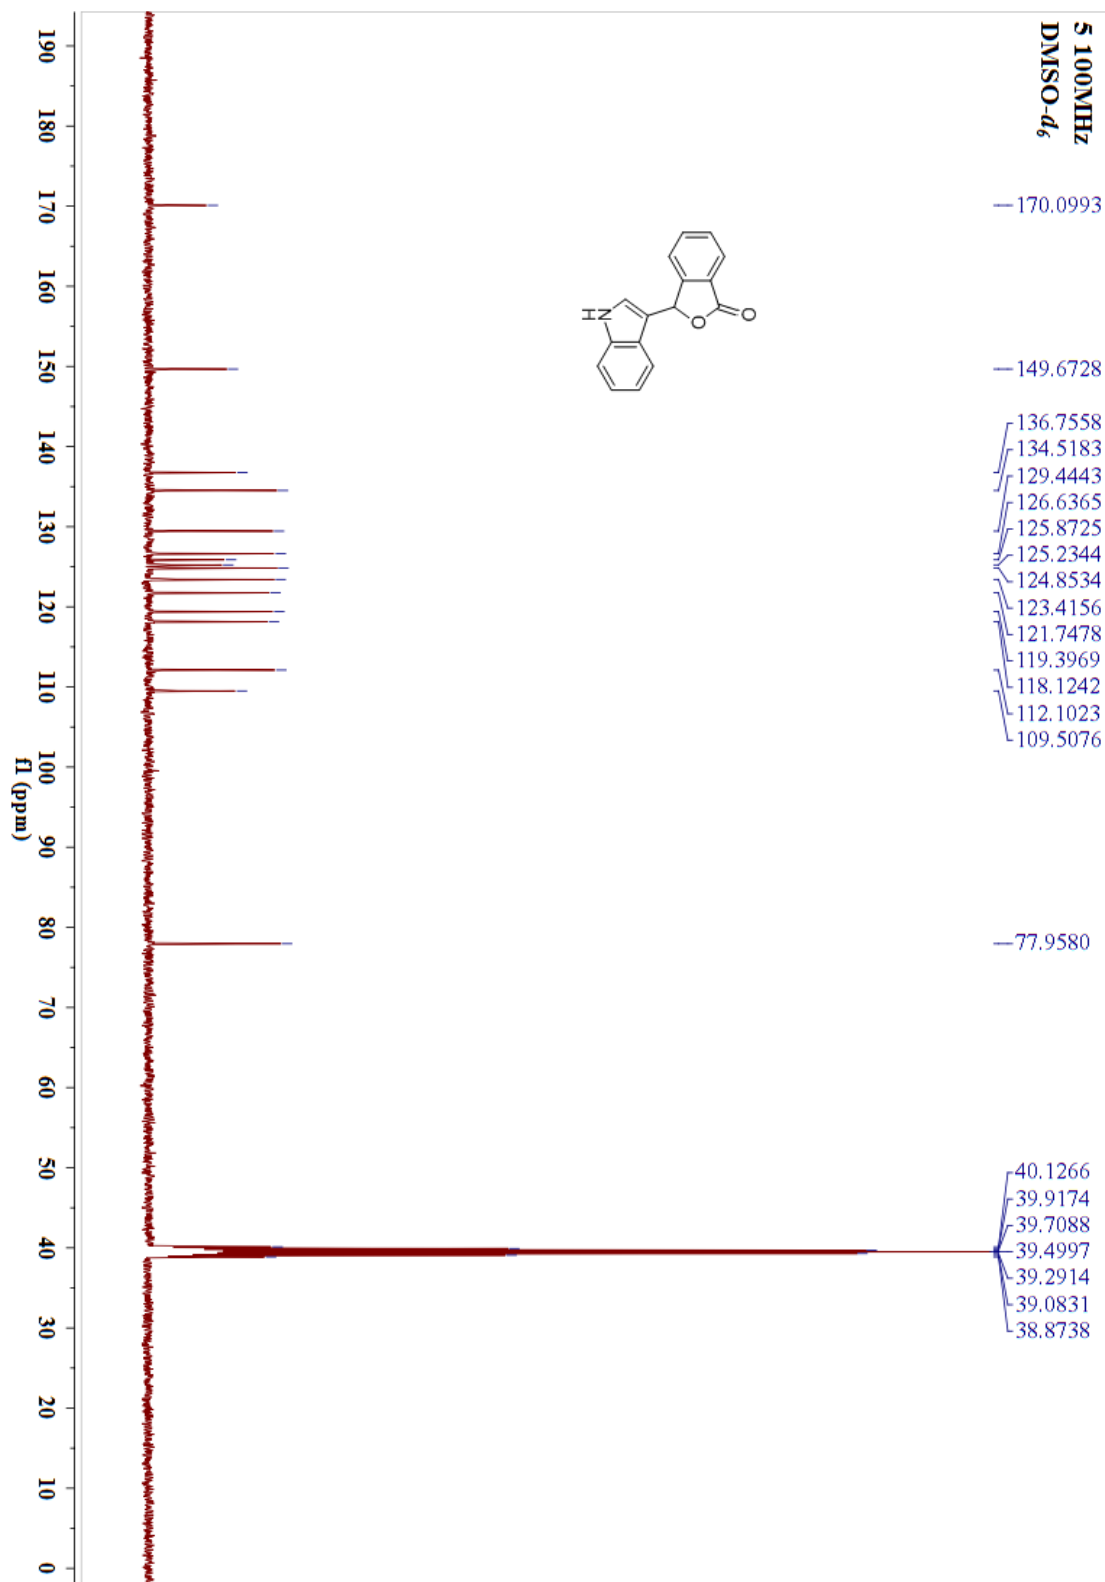

S40. LCMS spectrum of 3-(1*H*-Indol-3-yl)-2-propylisindolin-1-one (**4n**).

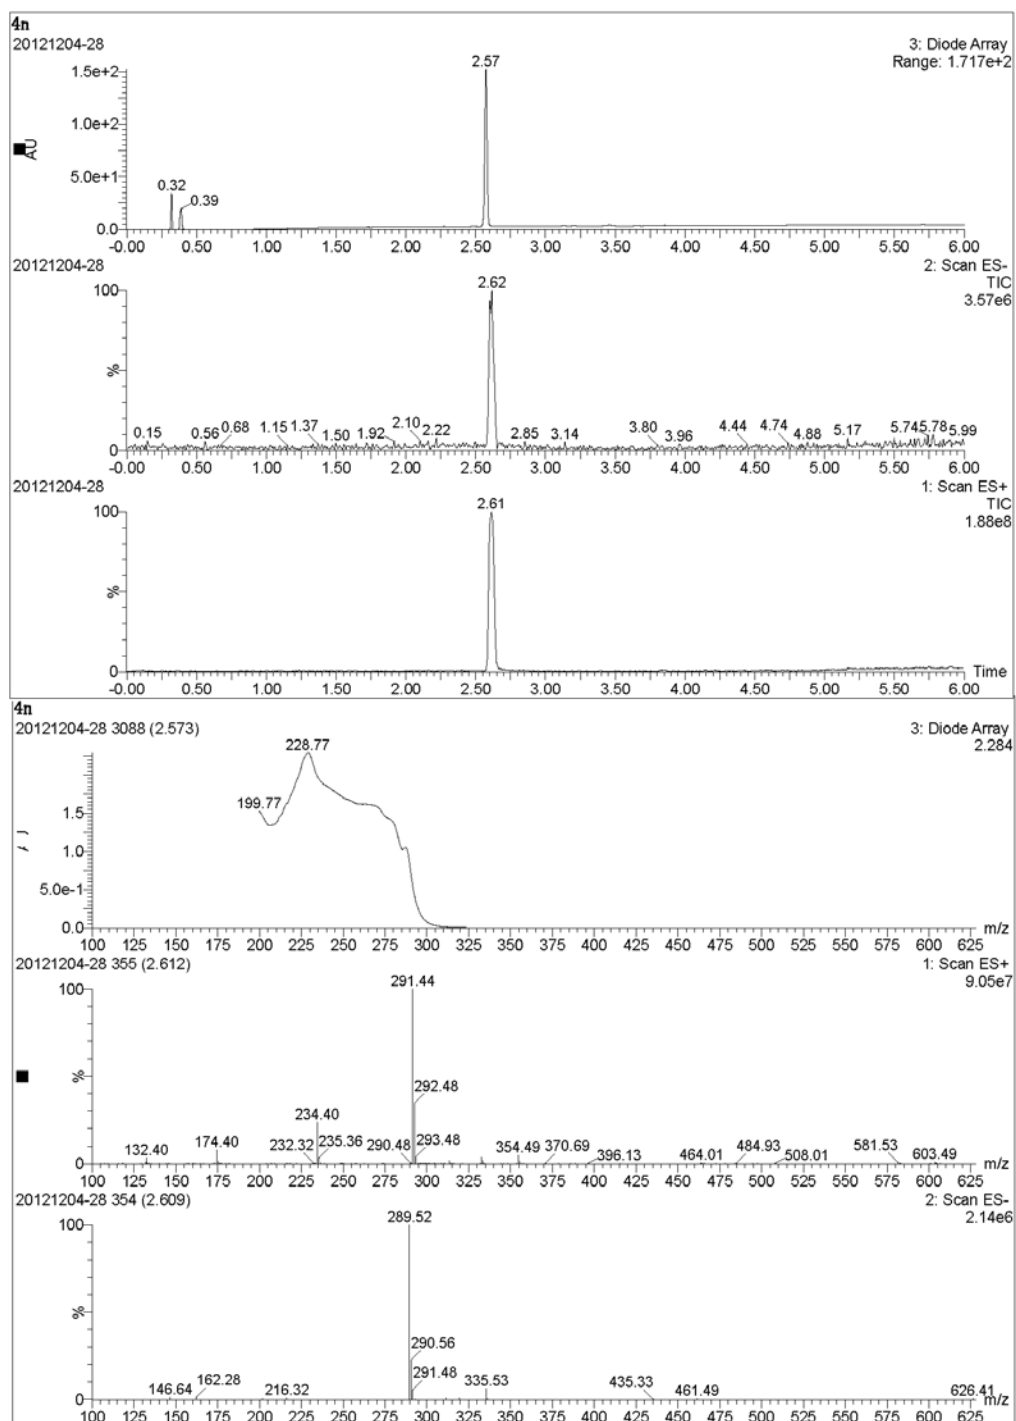



**S41.**  $^1\text{H}$  NMR spectrum of 3-(1*H*-Indol-3-yl)-2-propylisoindolin-1-one (**4n**) in DMSO- $d_6$ .

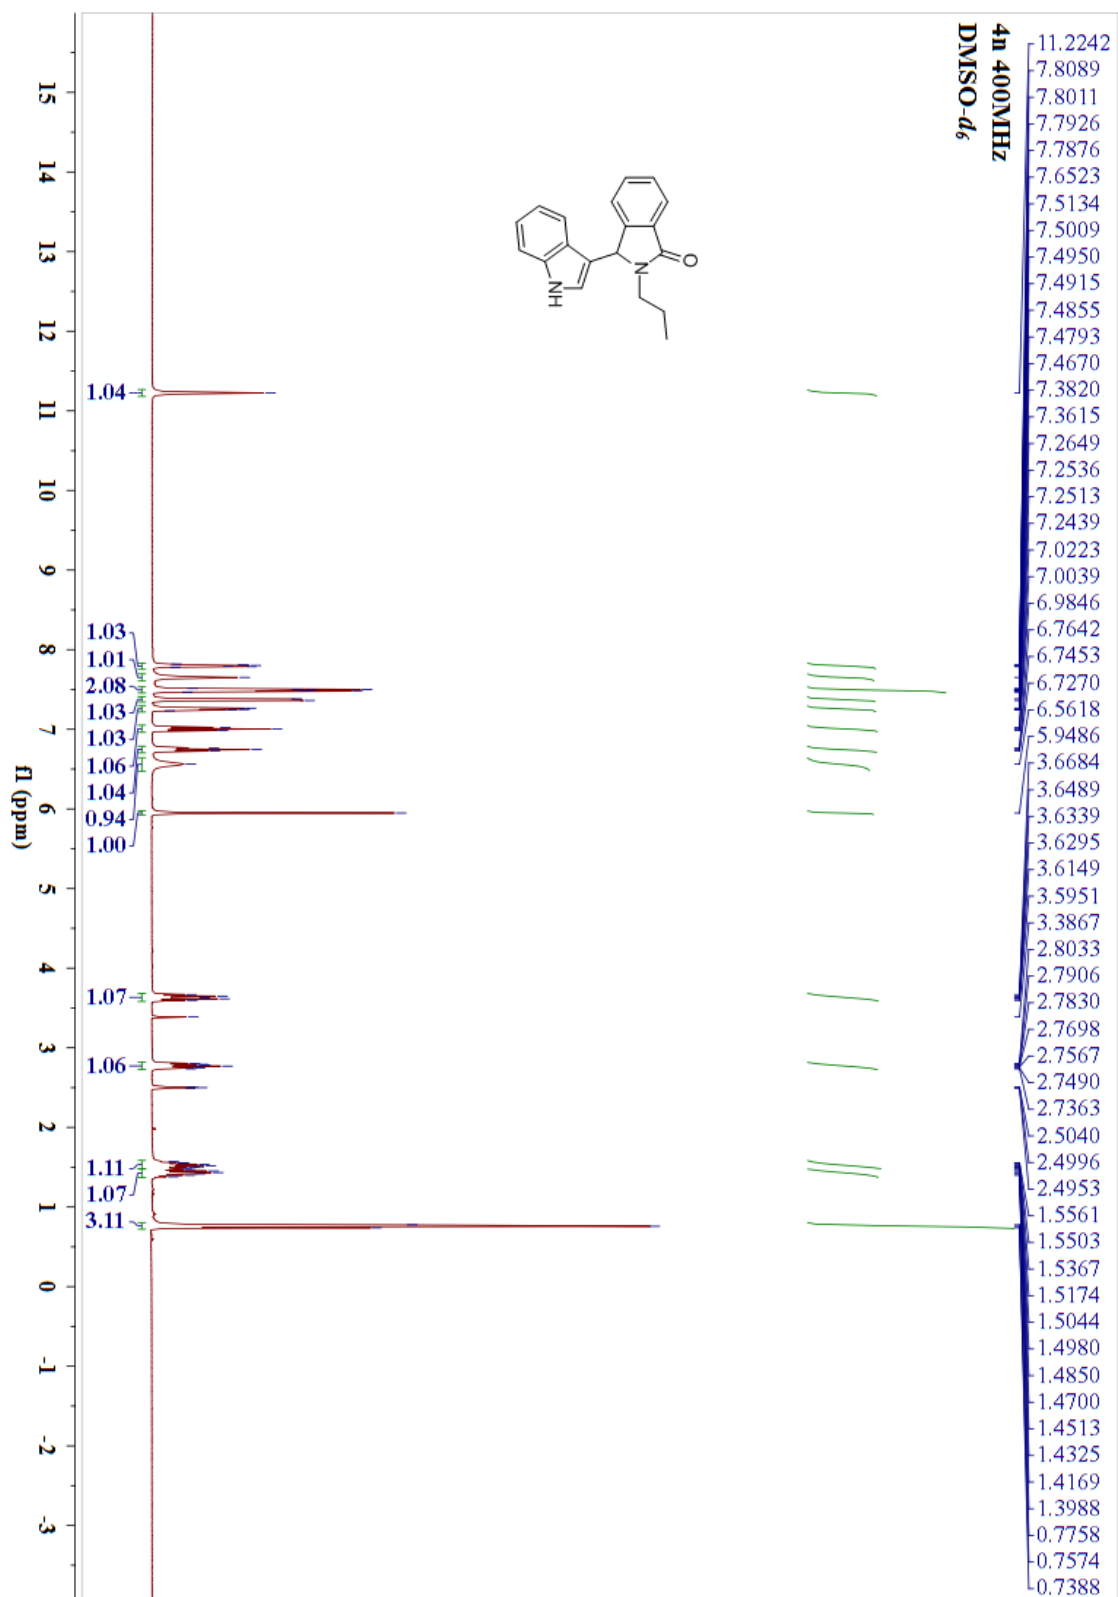

S42.  $^{13}\text{C}$  NMR spectrum of 3-(1*H*-Indol-3-yl)-2-propylisoindolin-1-one (**4n**) in  $\text{DMSO-}d_6$ .

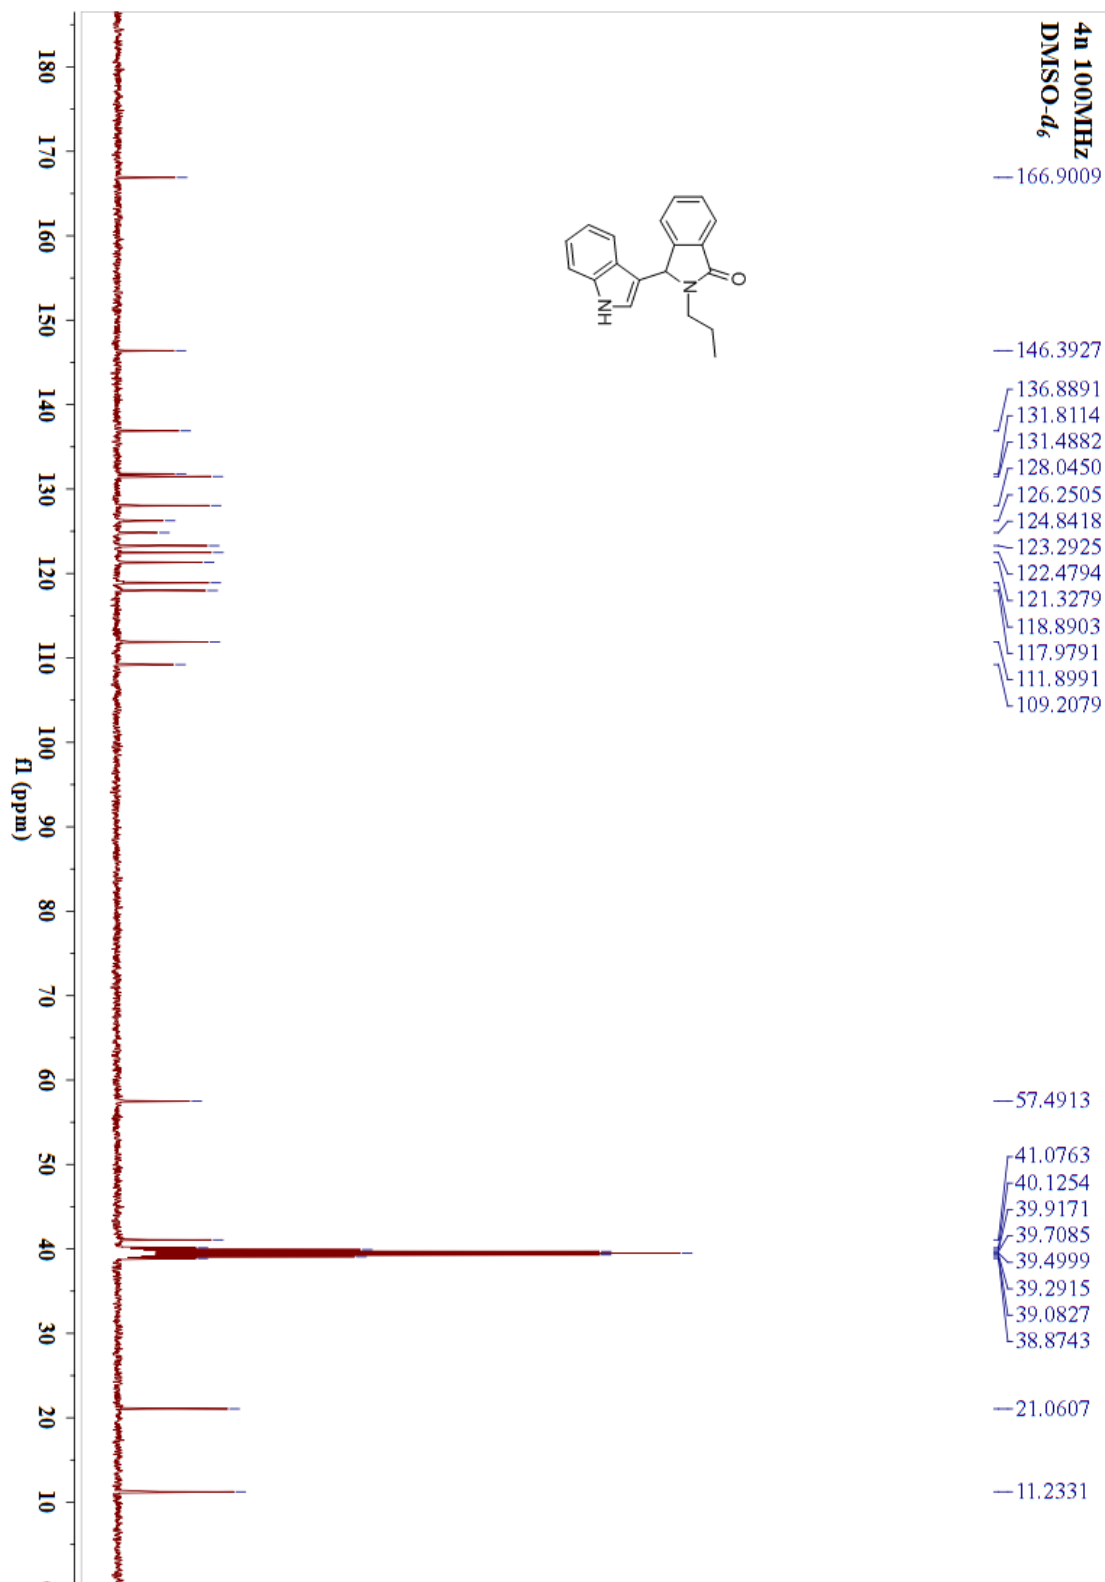

**S43.** LCMS spectrum of 2-butyl-3-(1*H*-indol-3-yl)isoindolin-1-one (**4o**).

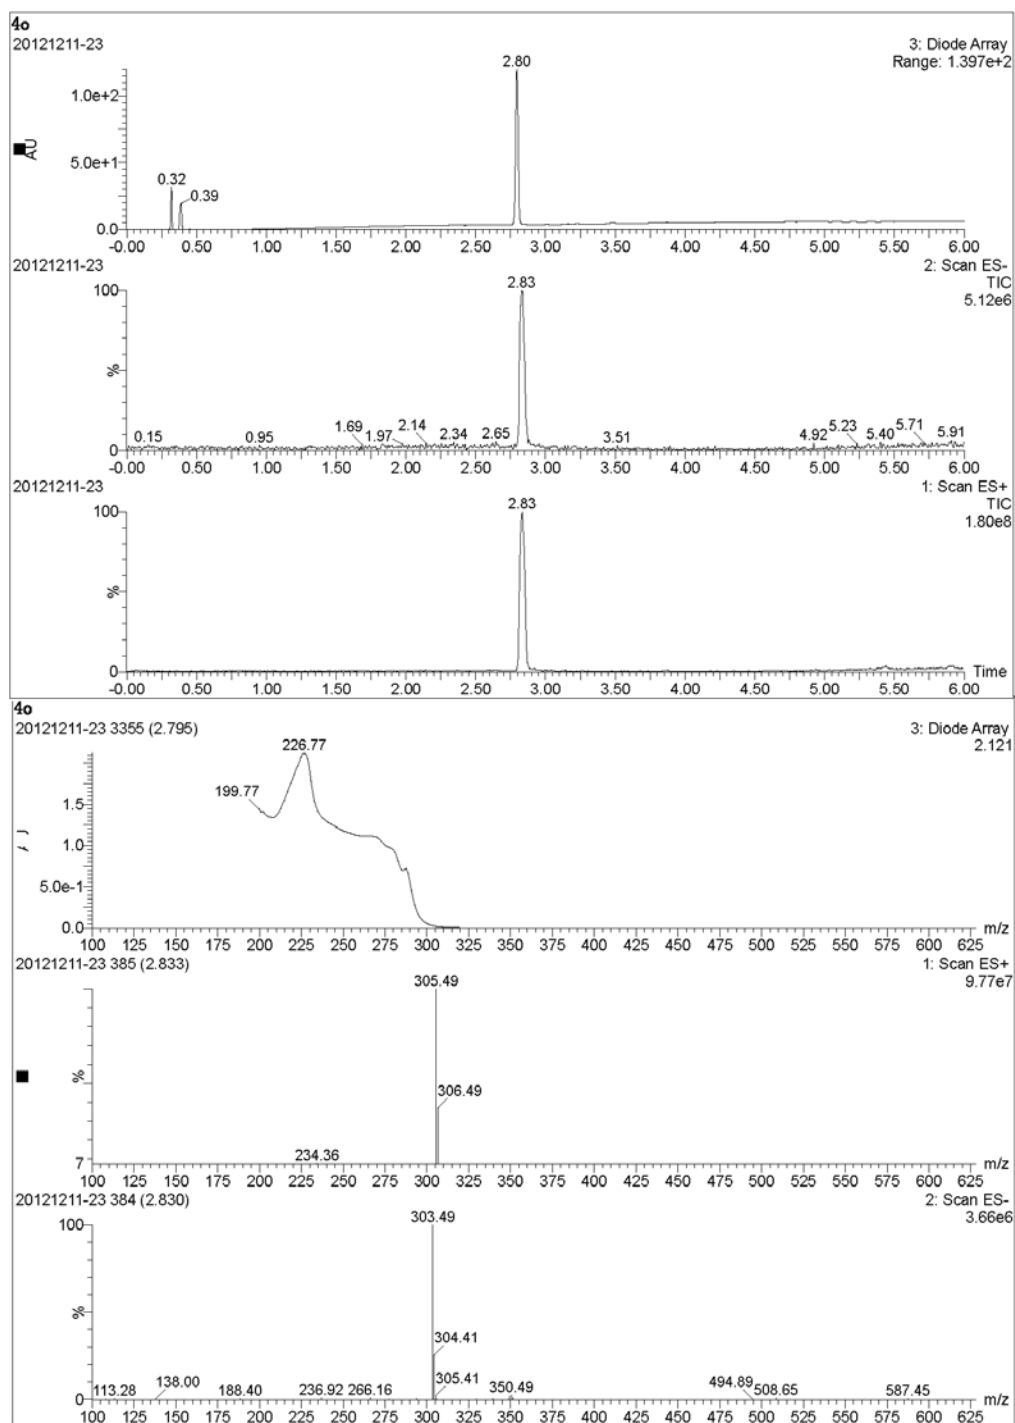

S44.  $^1\text{H}$  NMR spectrum of 2-butyl-3-(1*H*-indol-3-yl)isoindolin-1-one (**4o**) in  $\text{DMSO-}d_6$ .

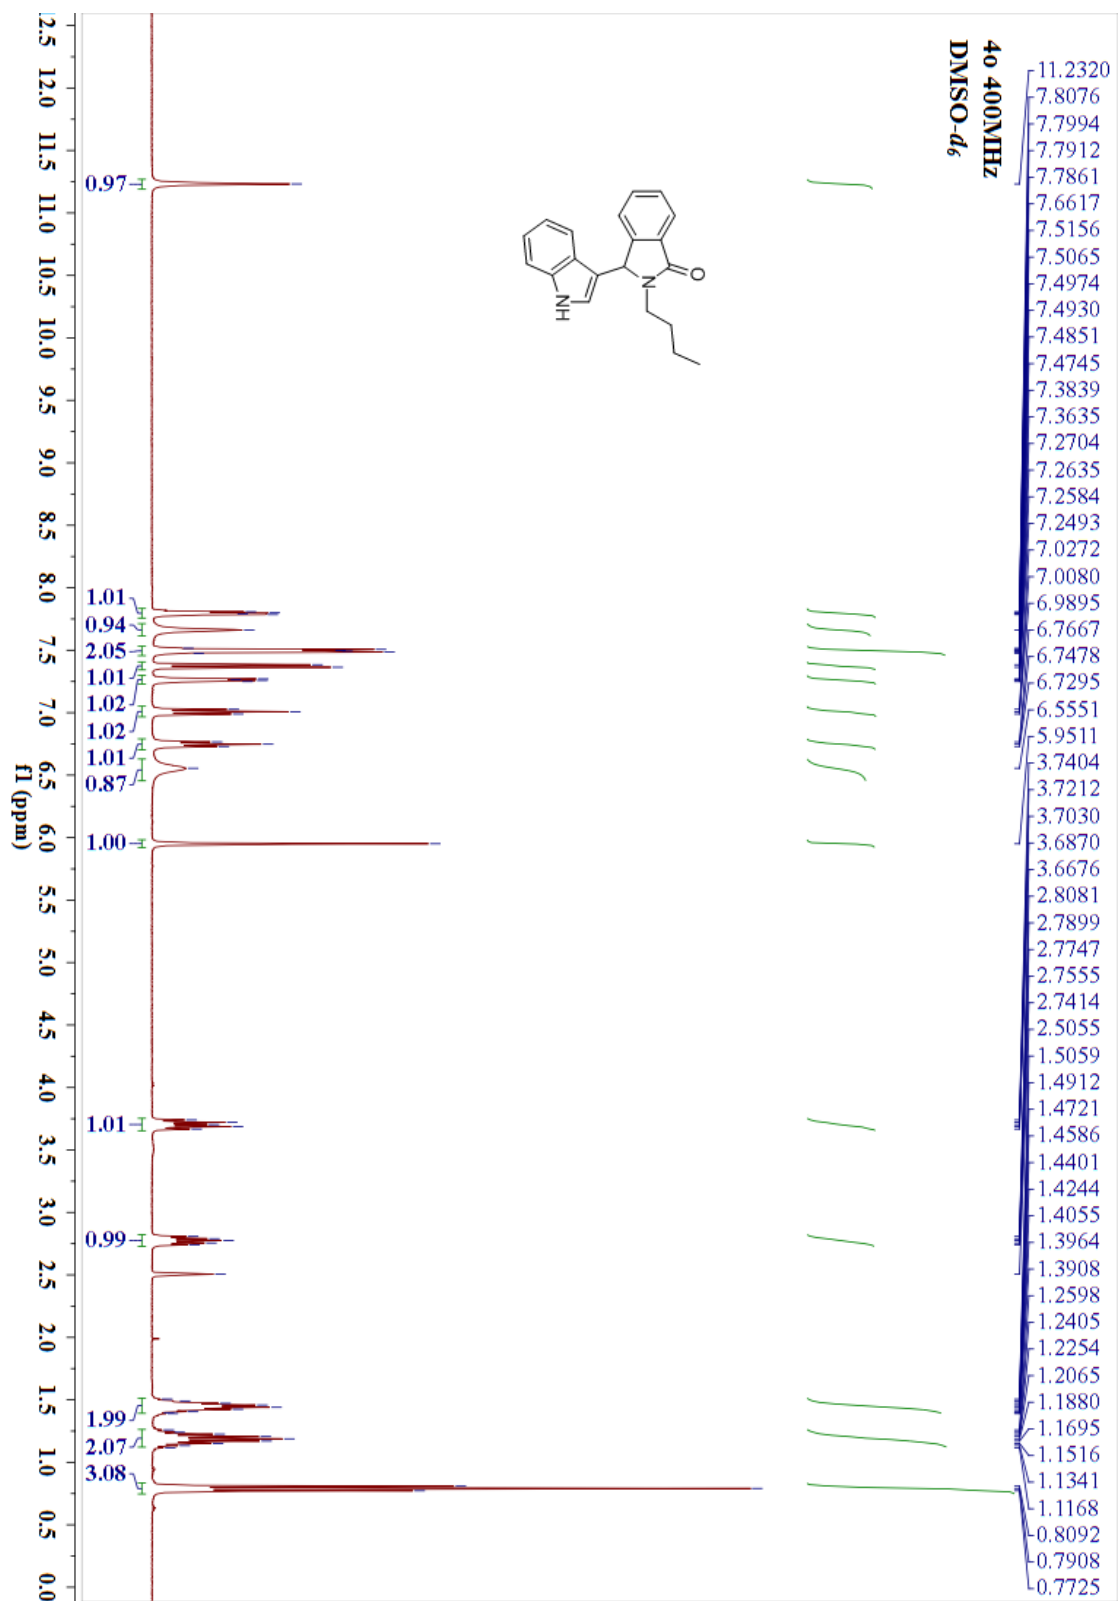

S45.  $^{13}\text{C}$  NMR spectrum of 2-butyl-3-(1*H*-indol-3-yl)isoindolin-1-one (**4o**) in DMSO- $d_6$ .

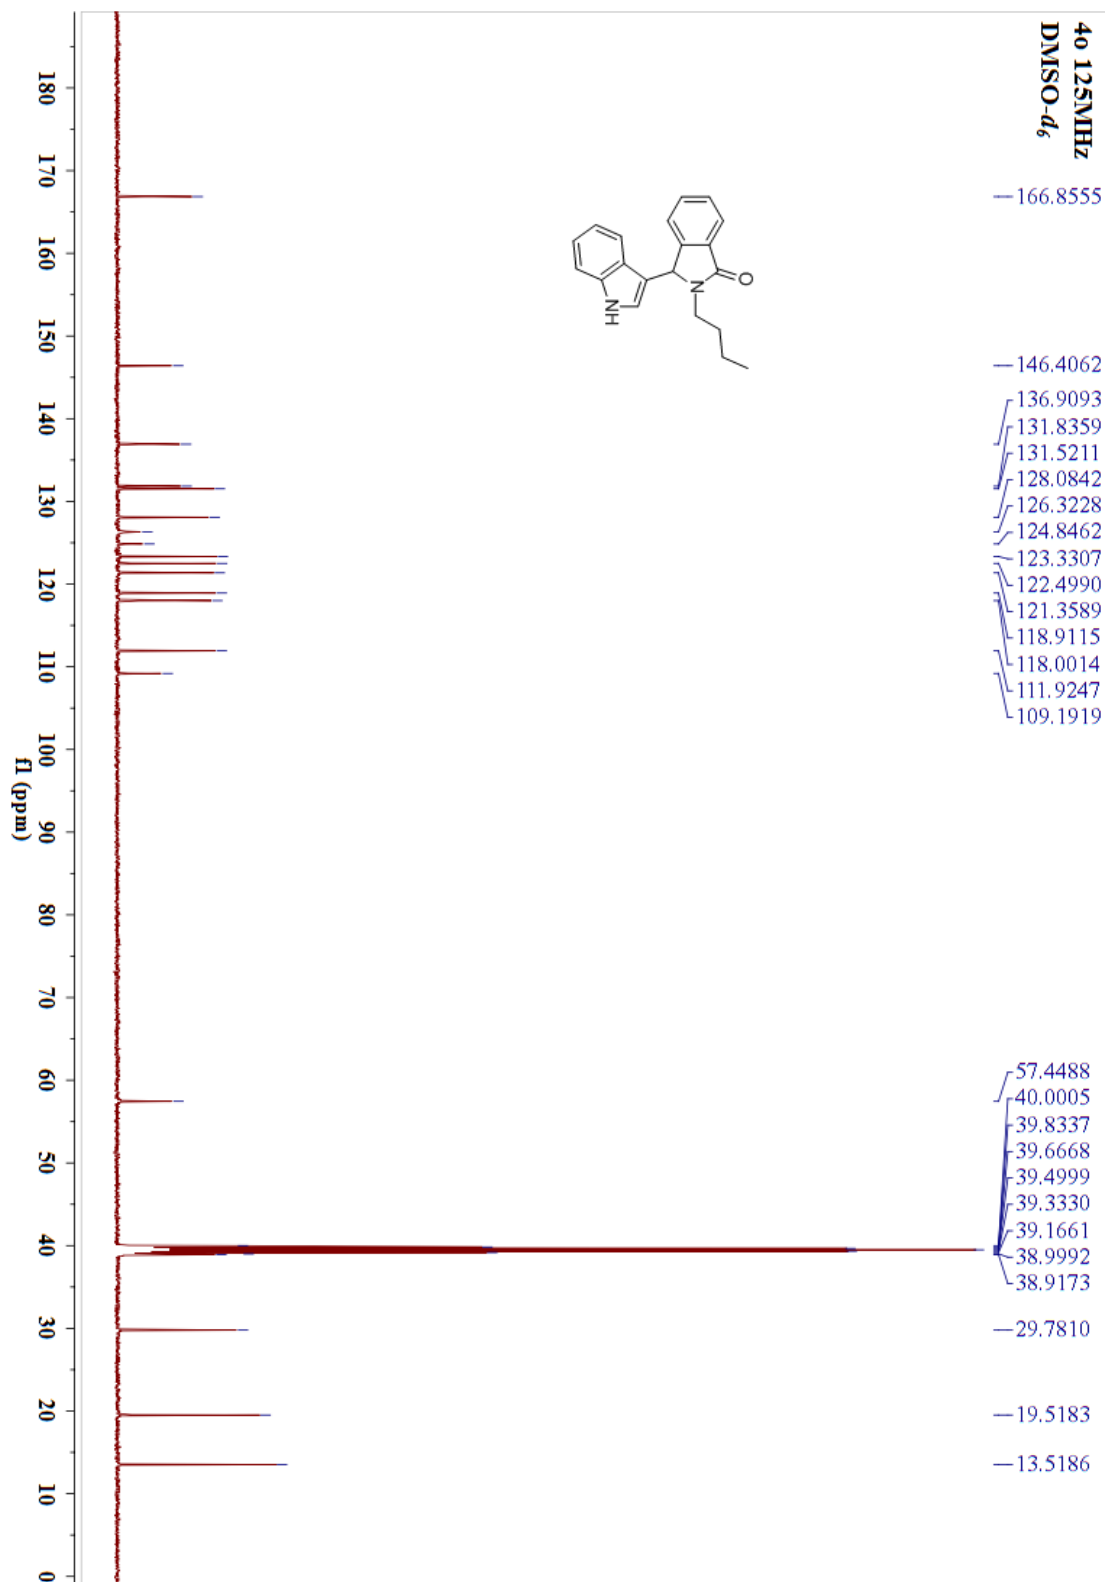

**S46.** LCMS spectrum of 3-(1*H*-Indol-3-yl)-2-isobutylisoindolin-1-one (**4p**).

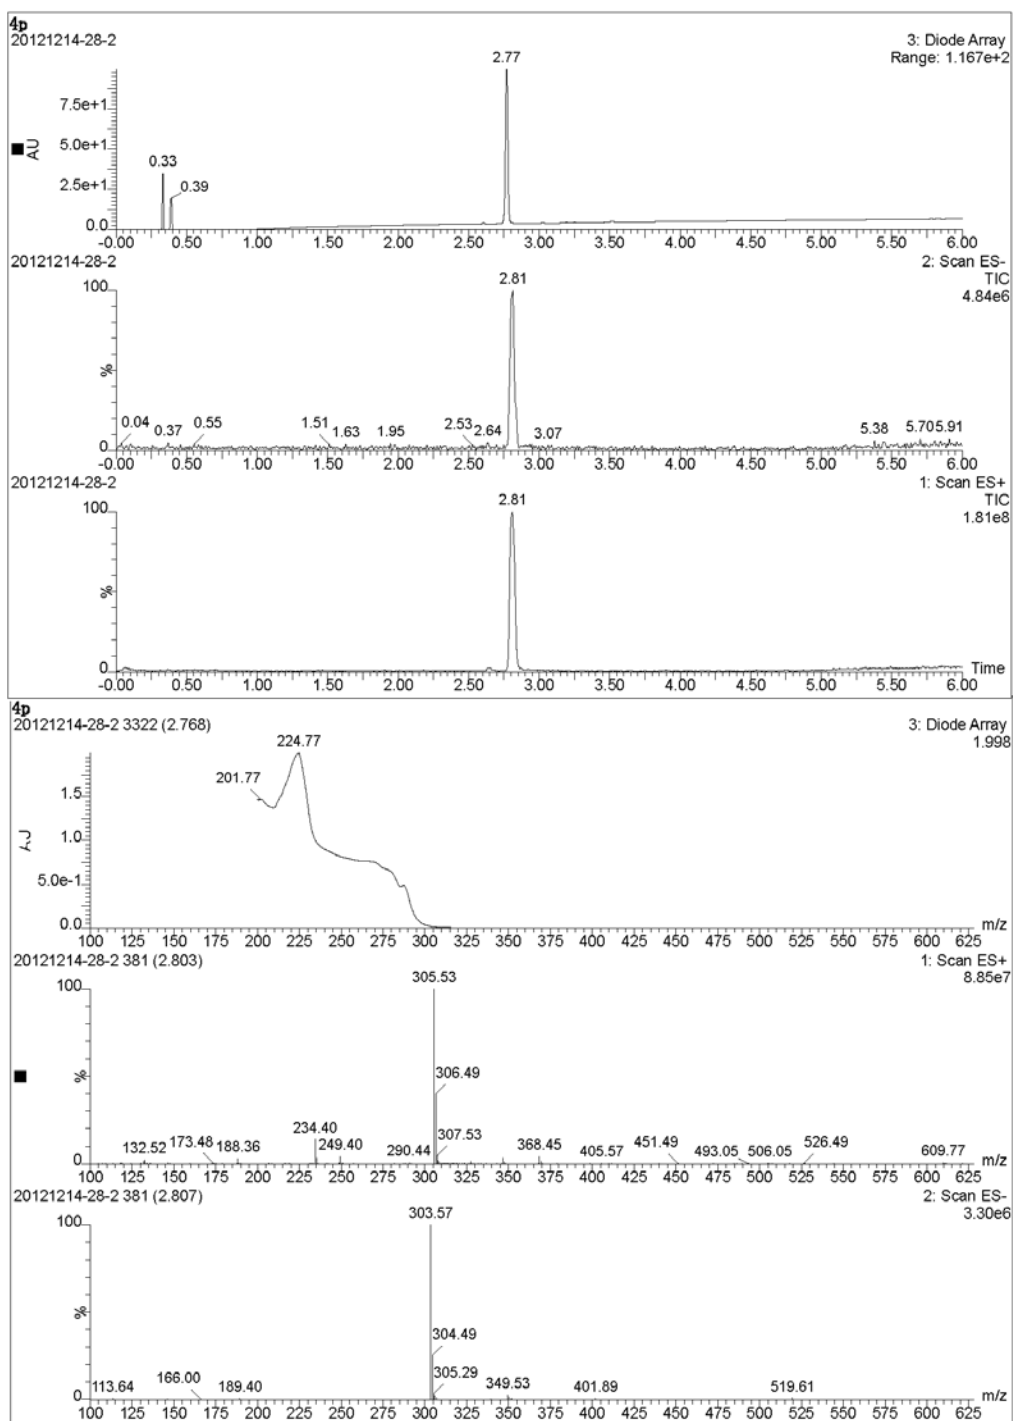

S47.  $^1\text{H}$  NMR spectrum of 3-(1*H*-Indol-3-yl)-2-isobutylisoindolin-1-one (**4p**) in  $\text{DMSO-}d_6$ .

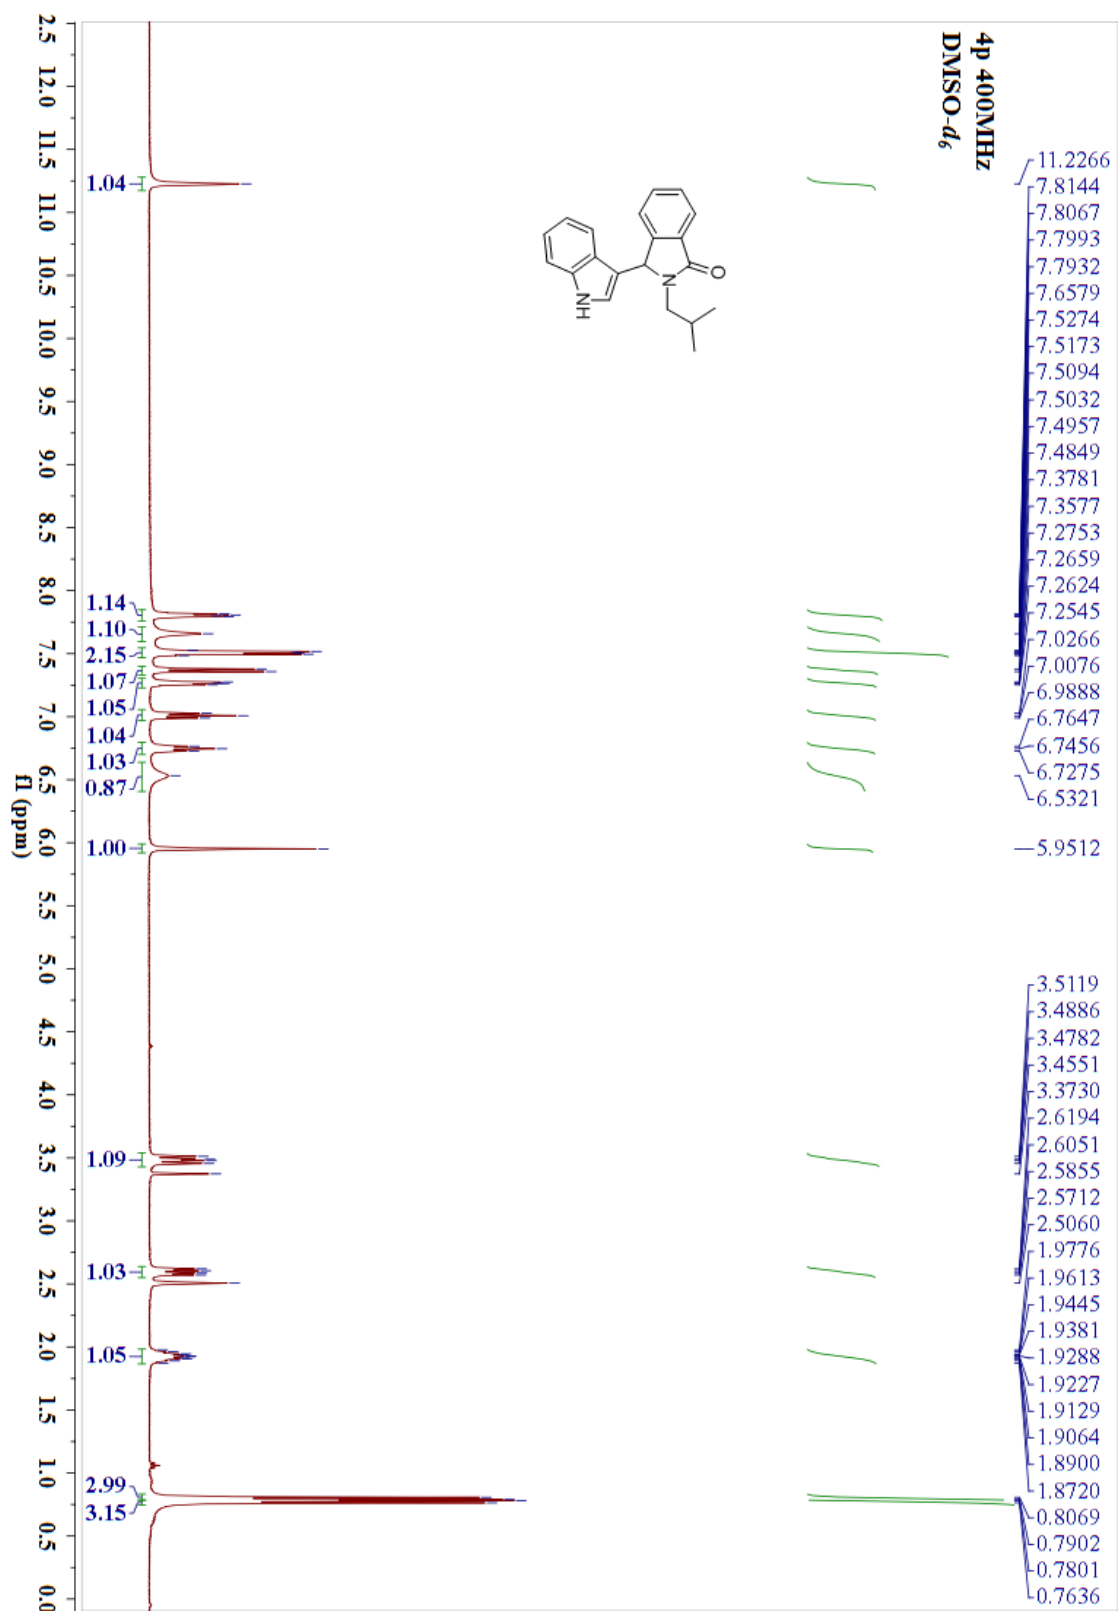

**S48.**  $^{13}\text{C}$  NMR spectrum of 3-(1*H*-Indol-3-yl)-2-isobutylisoindolin-1-one (**4p**) in  $\text{DMSO-}d_6$ .

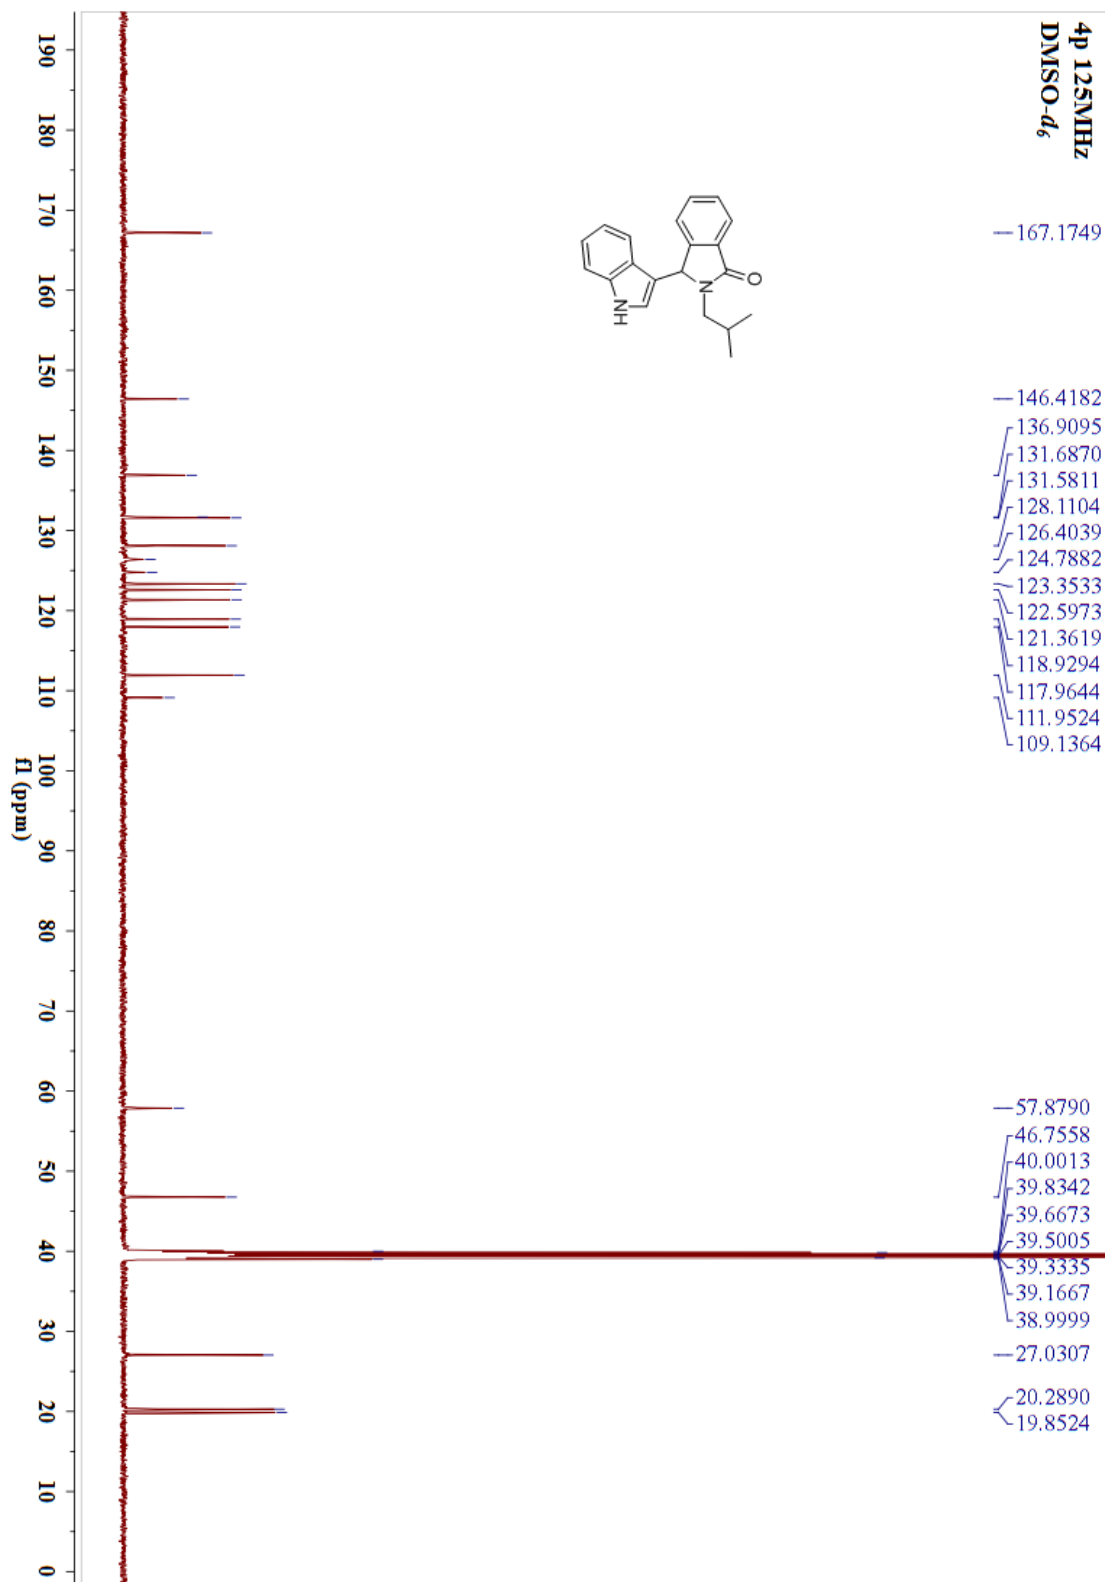



**S49.** LCMS spectrum of 3-(1*H*-indol-3-yl)-2-isopropylisoindolin-1-one (**4q**).

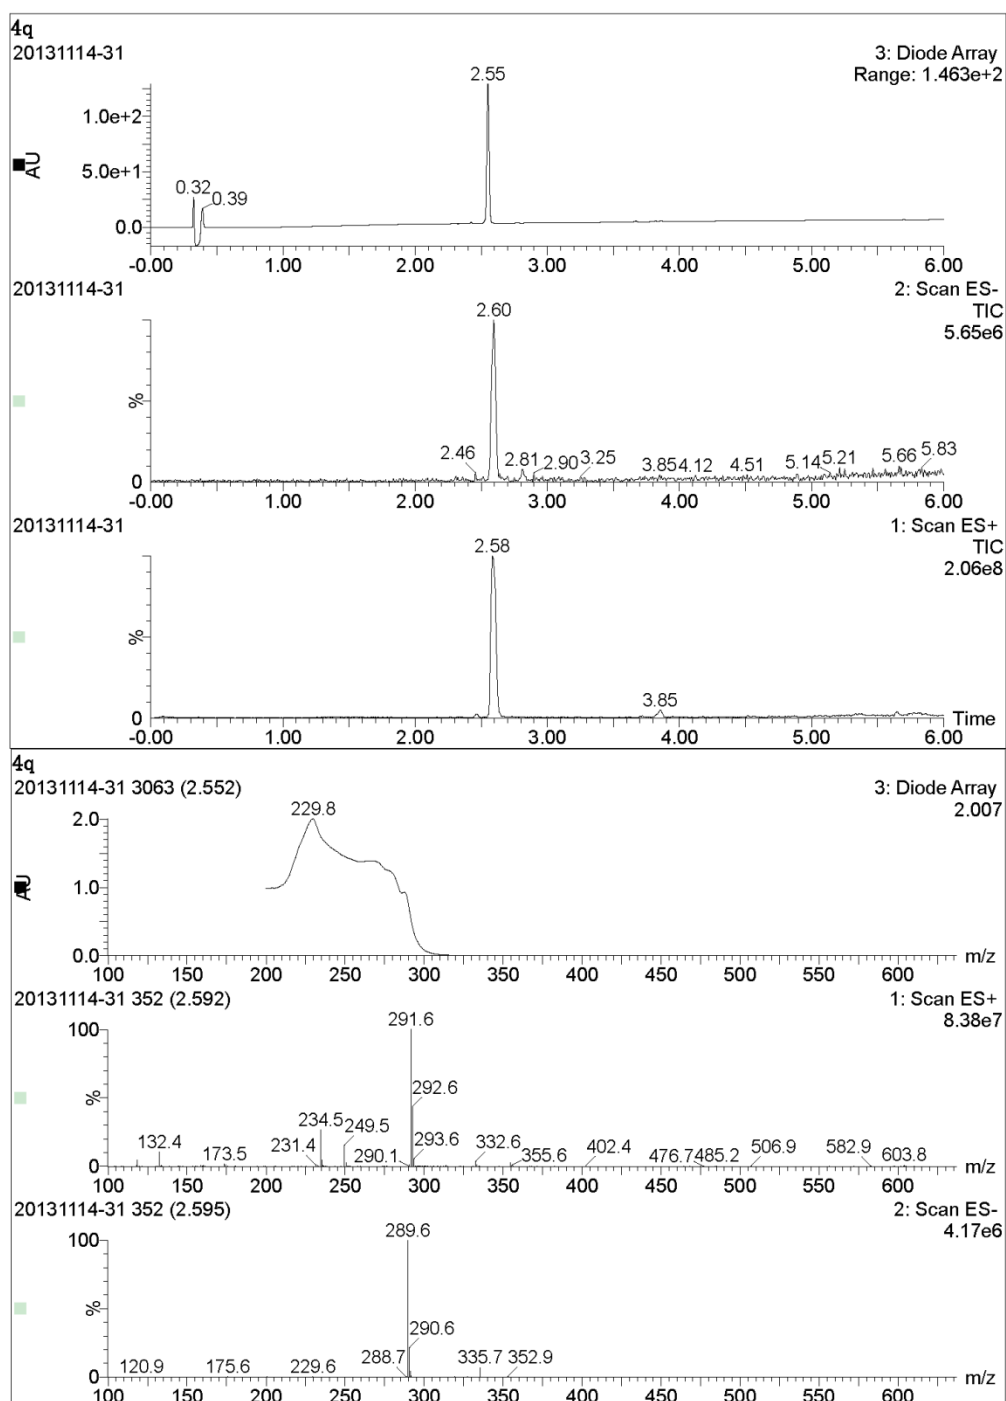

**S50.**  $^1\text{H}$  NMR spectrum of 3-(1*H*-indol-3-yl)-2-isopropylisoindolin-1-one (**4q**) in  $\text{DMSO-}d_6$ .

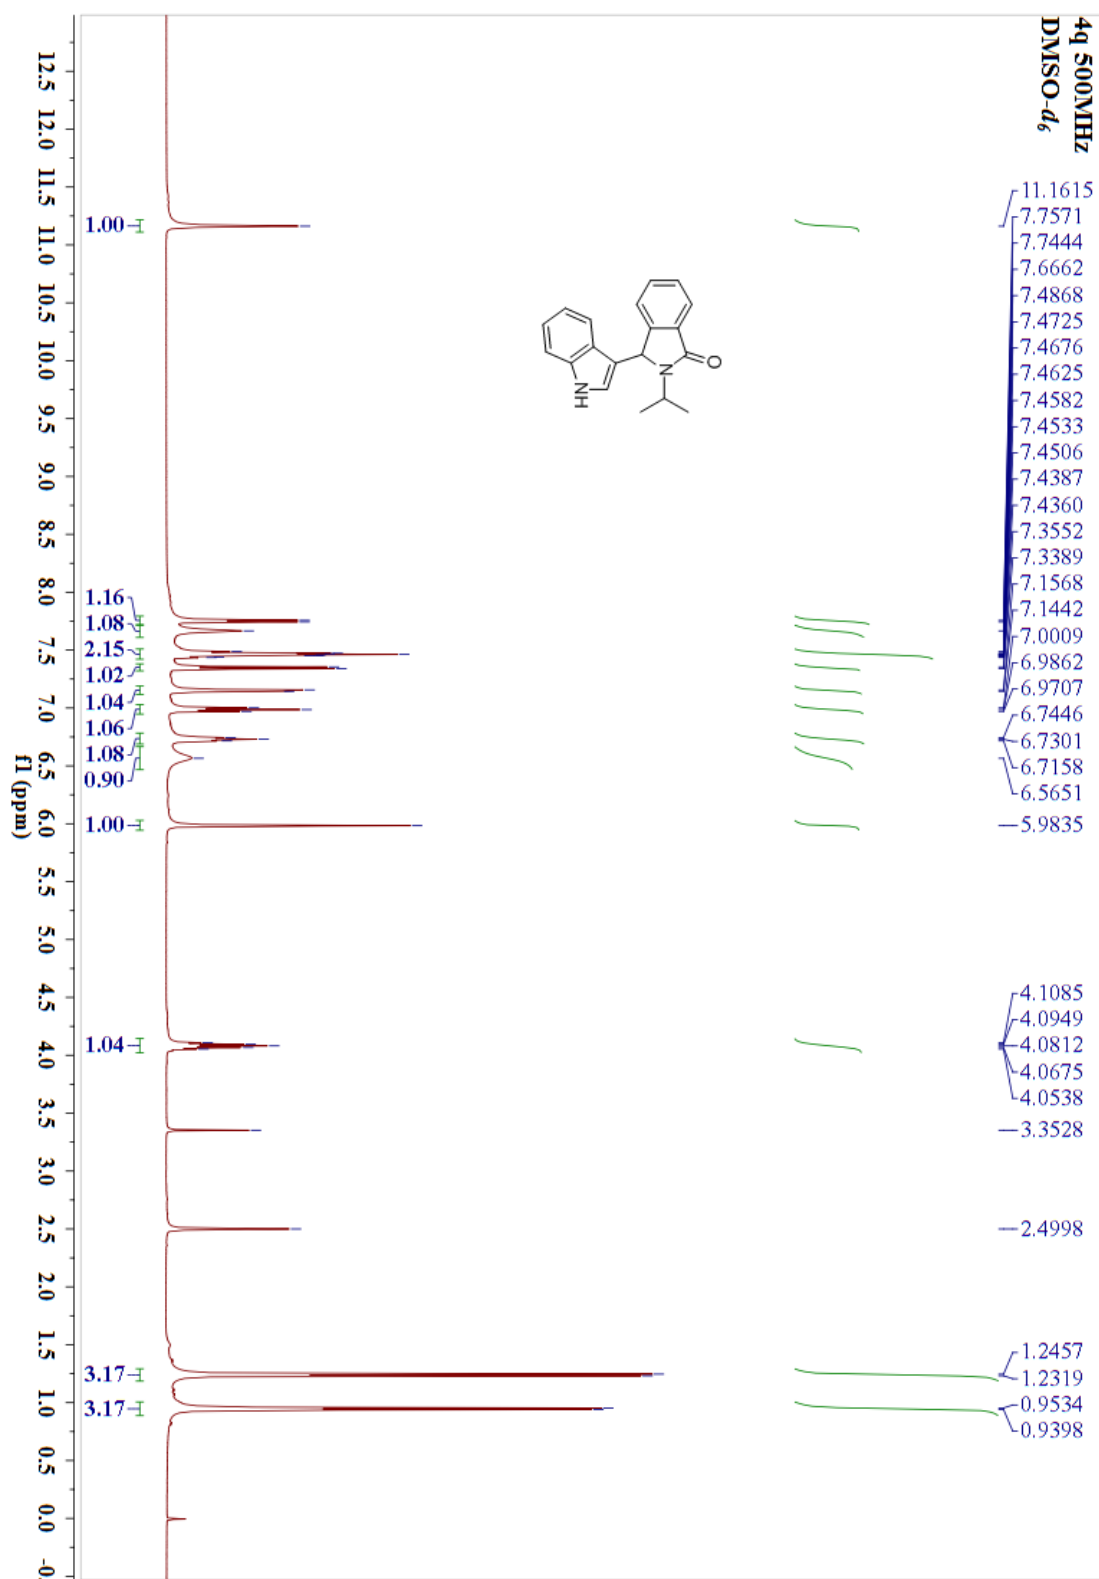

**S51.**  $^{13}\text{C}$  NMR spectrum of 3-(1*H*-indol-3-yl)-2-isopropylisoindolin-1-one (**4q**) in DMSO- $d_6$ .

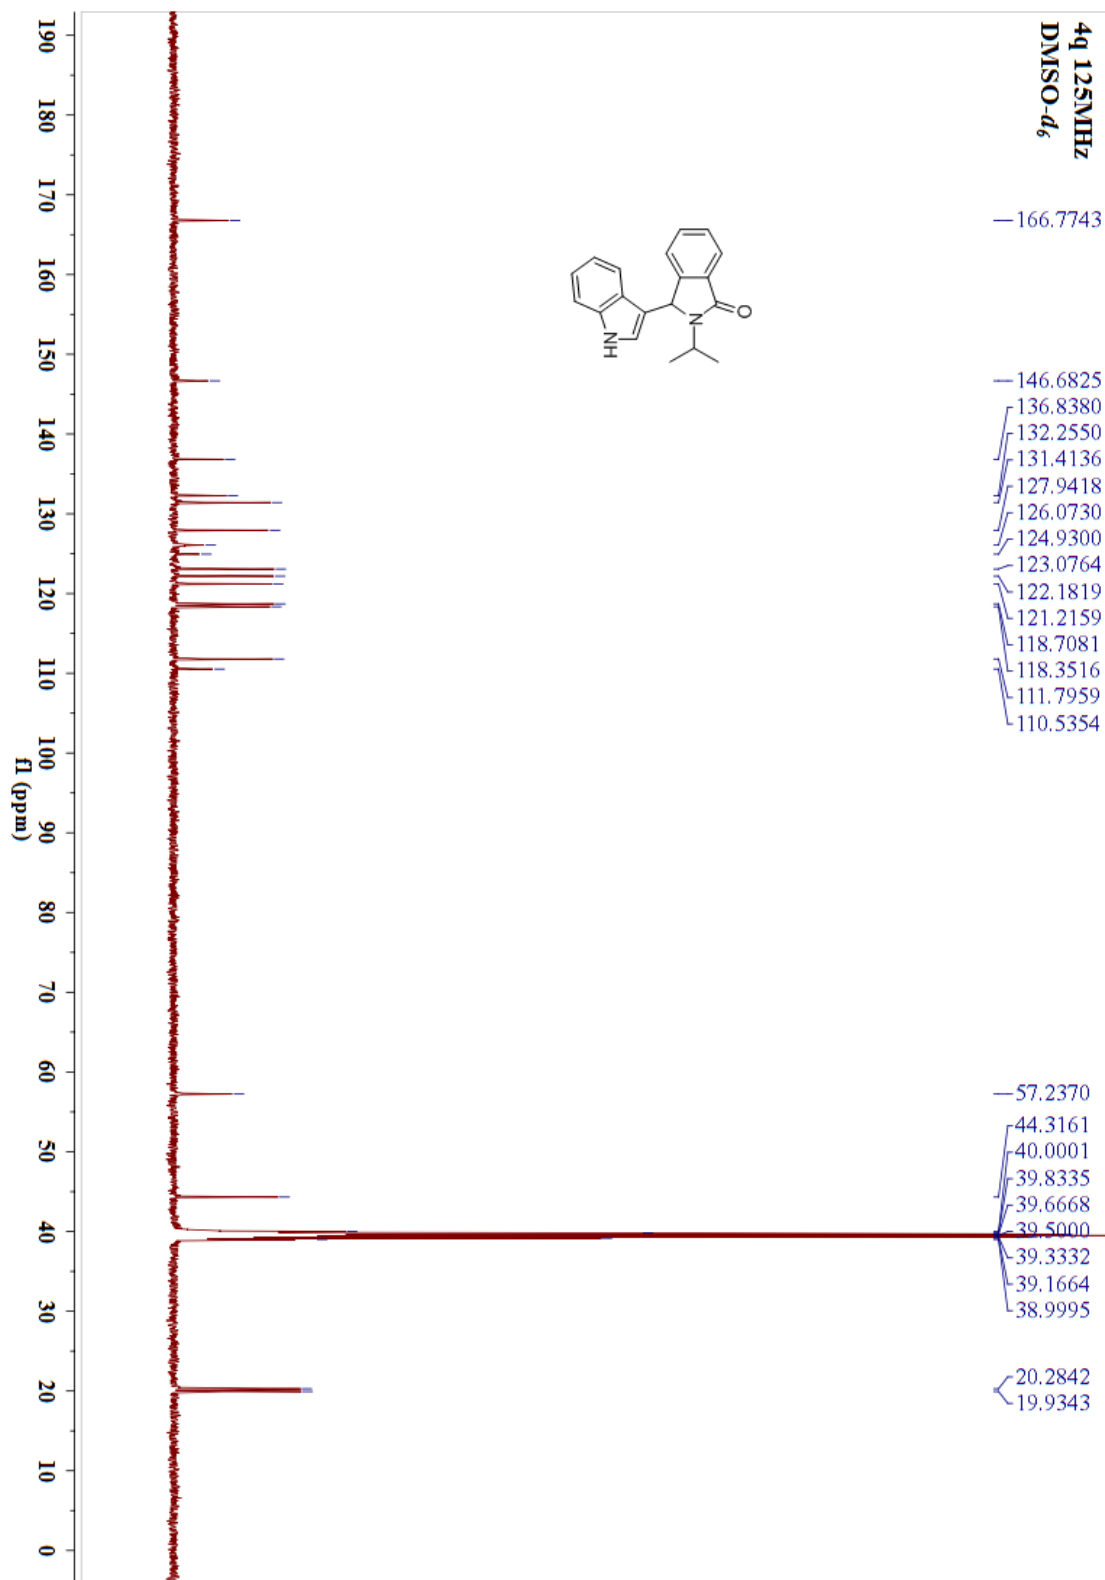

S52. LCMS spectrum of 2-cyclopentyl-3-(1*H*-indol-3-yl)isoindolin-1-one (**4s**).

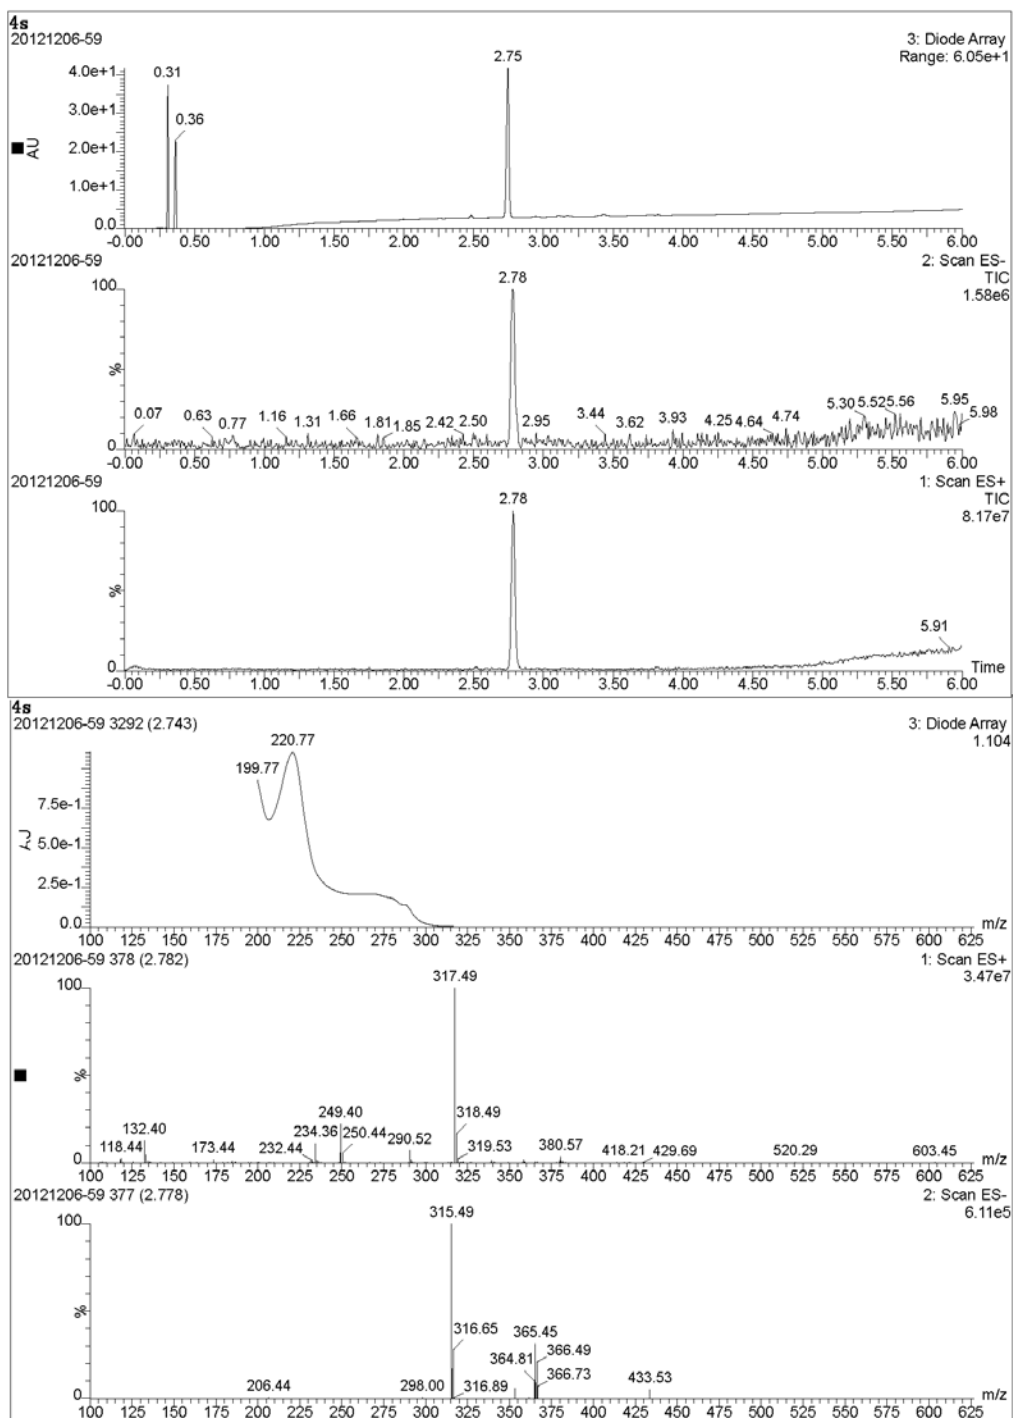

S53.  $^1\text{H}$  NMR spectrum of 2-cyclopentyl-3-(1*H*-indol-3-yl)isoindolin-1-one (**4s**) in DMSO- $d_6$ .

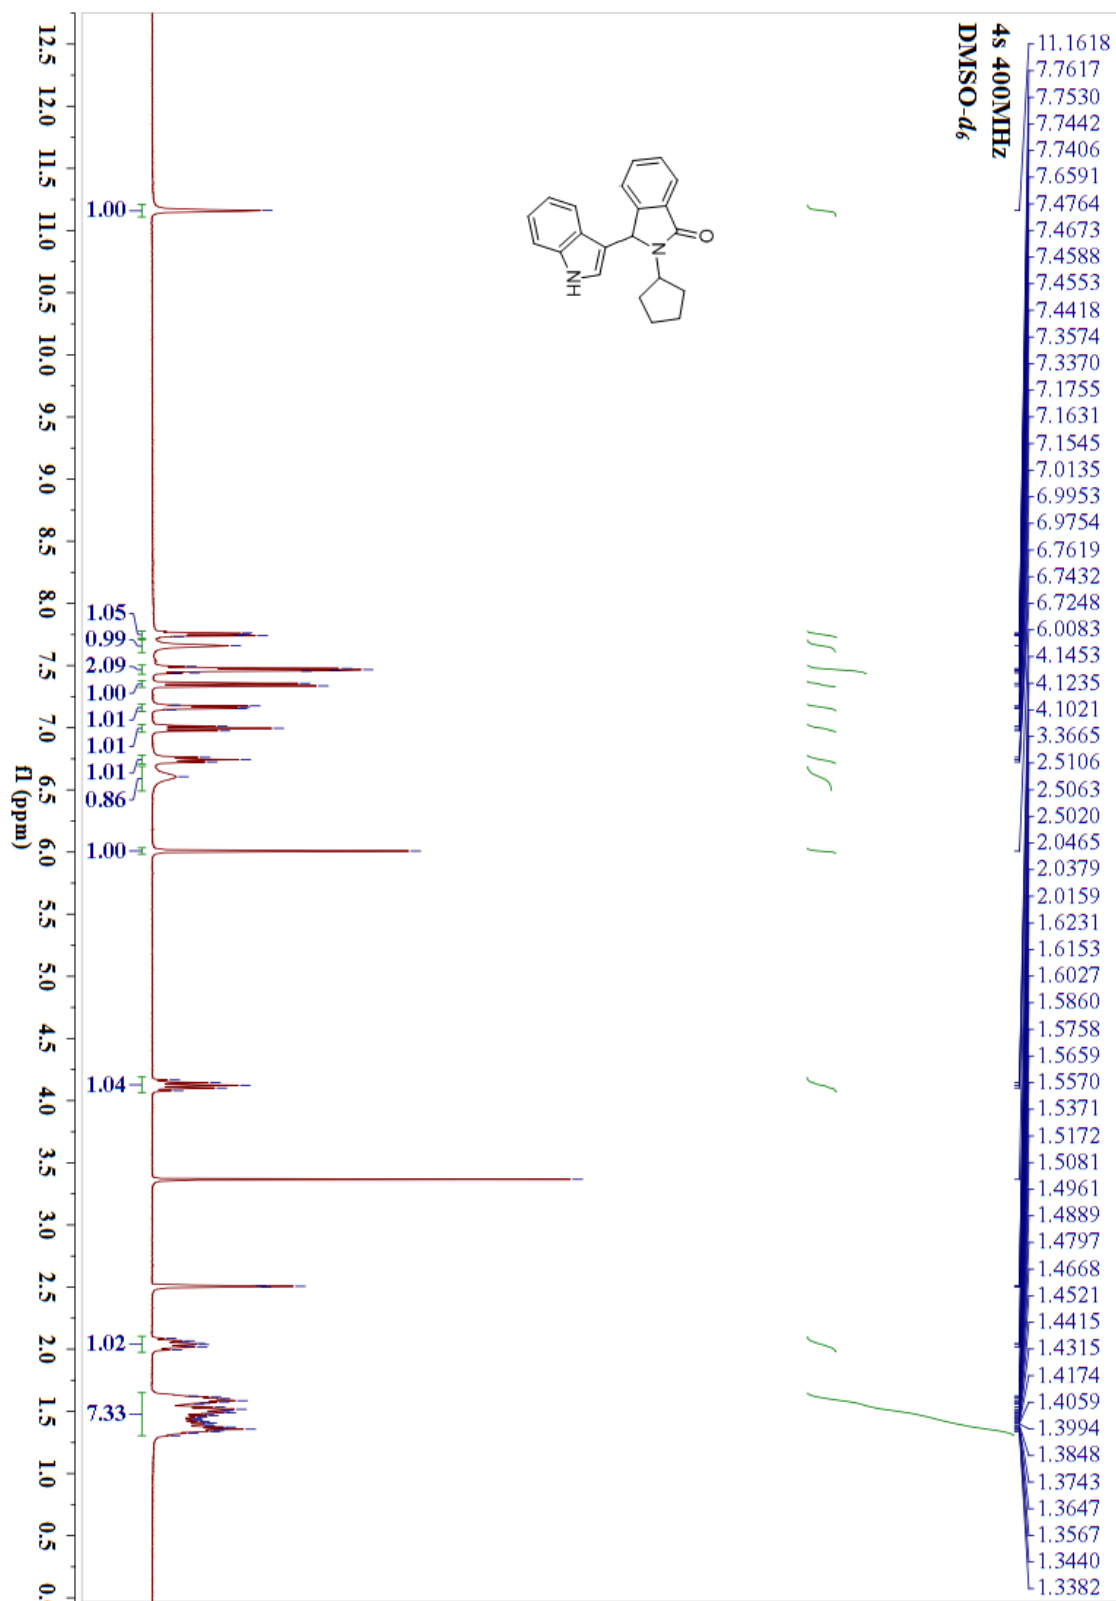

S54.  $^{13}\text{C}$  NMR spectrum of 2-cyclopentyl-3-(1*H*-indol-3-yl)isoindolin-1-one (**4s**) in DMSO- $d_6$ .

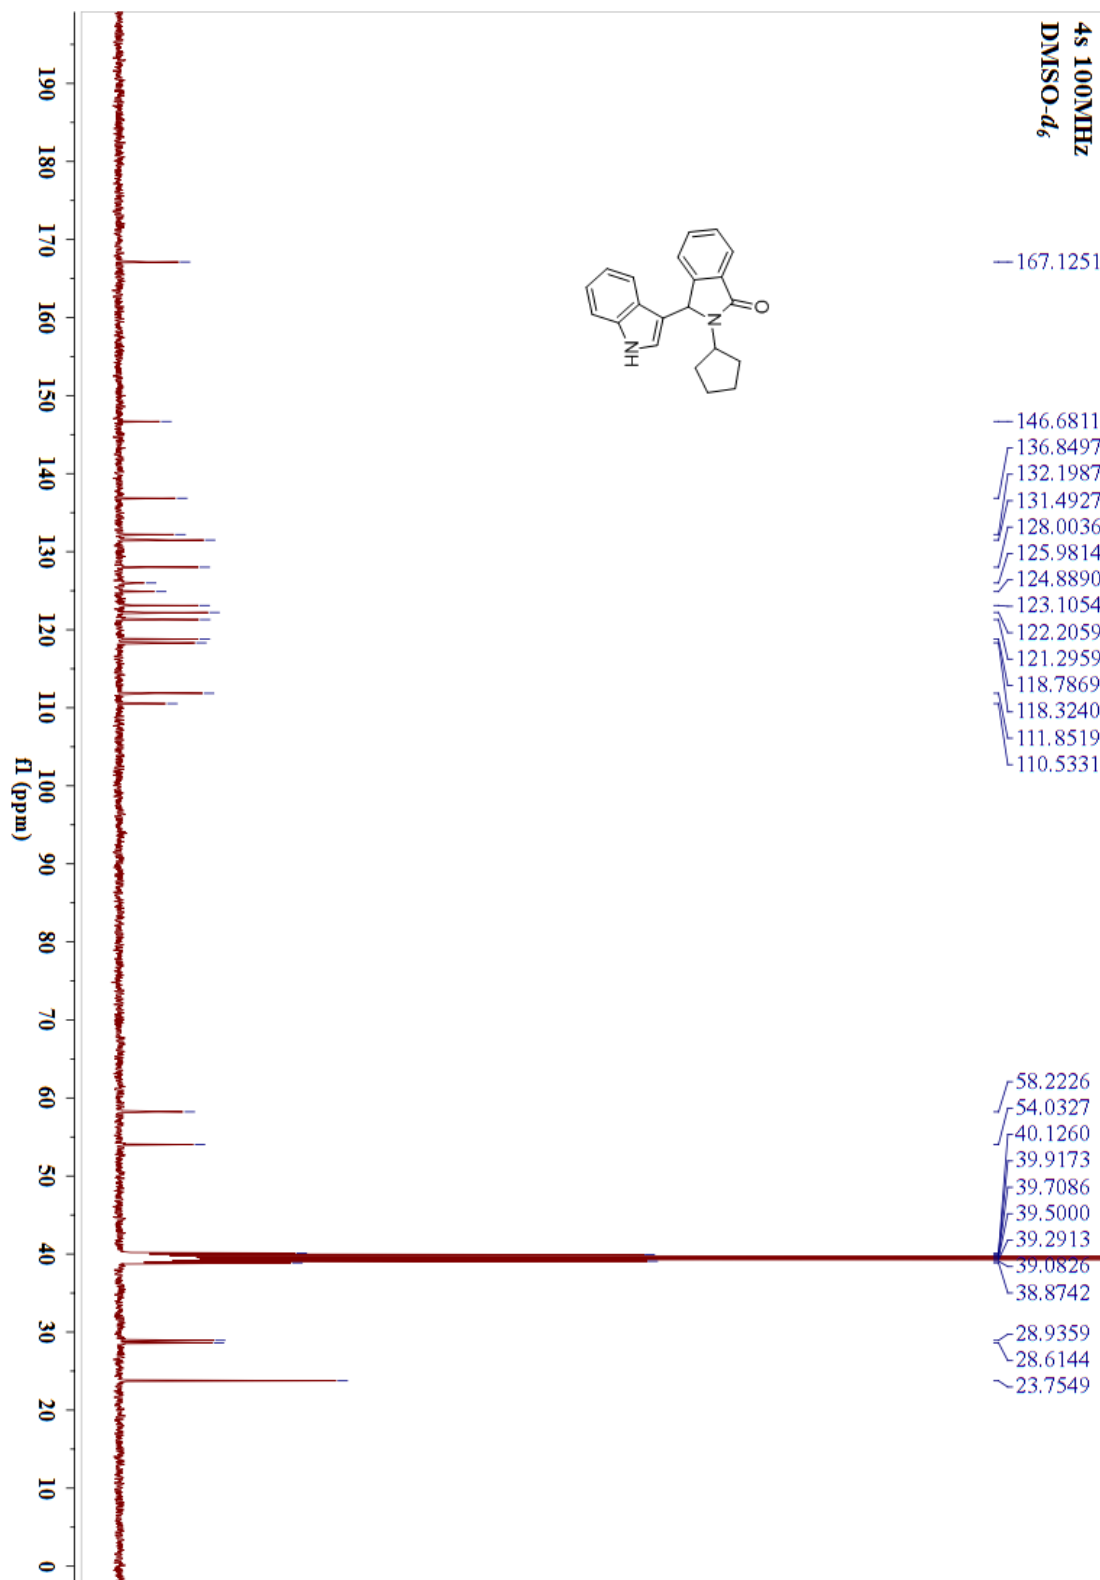

S55. LCMS spectrum of 2-cyclopropyl-3-(1*H*-indol-3-yl)isoindolin-1-one (**4t**).

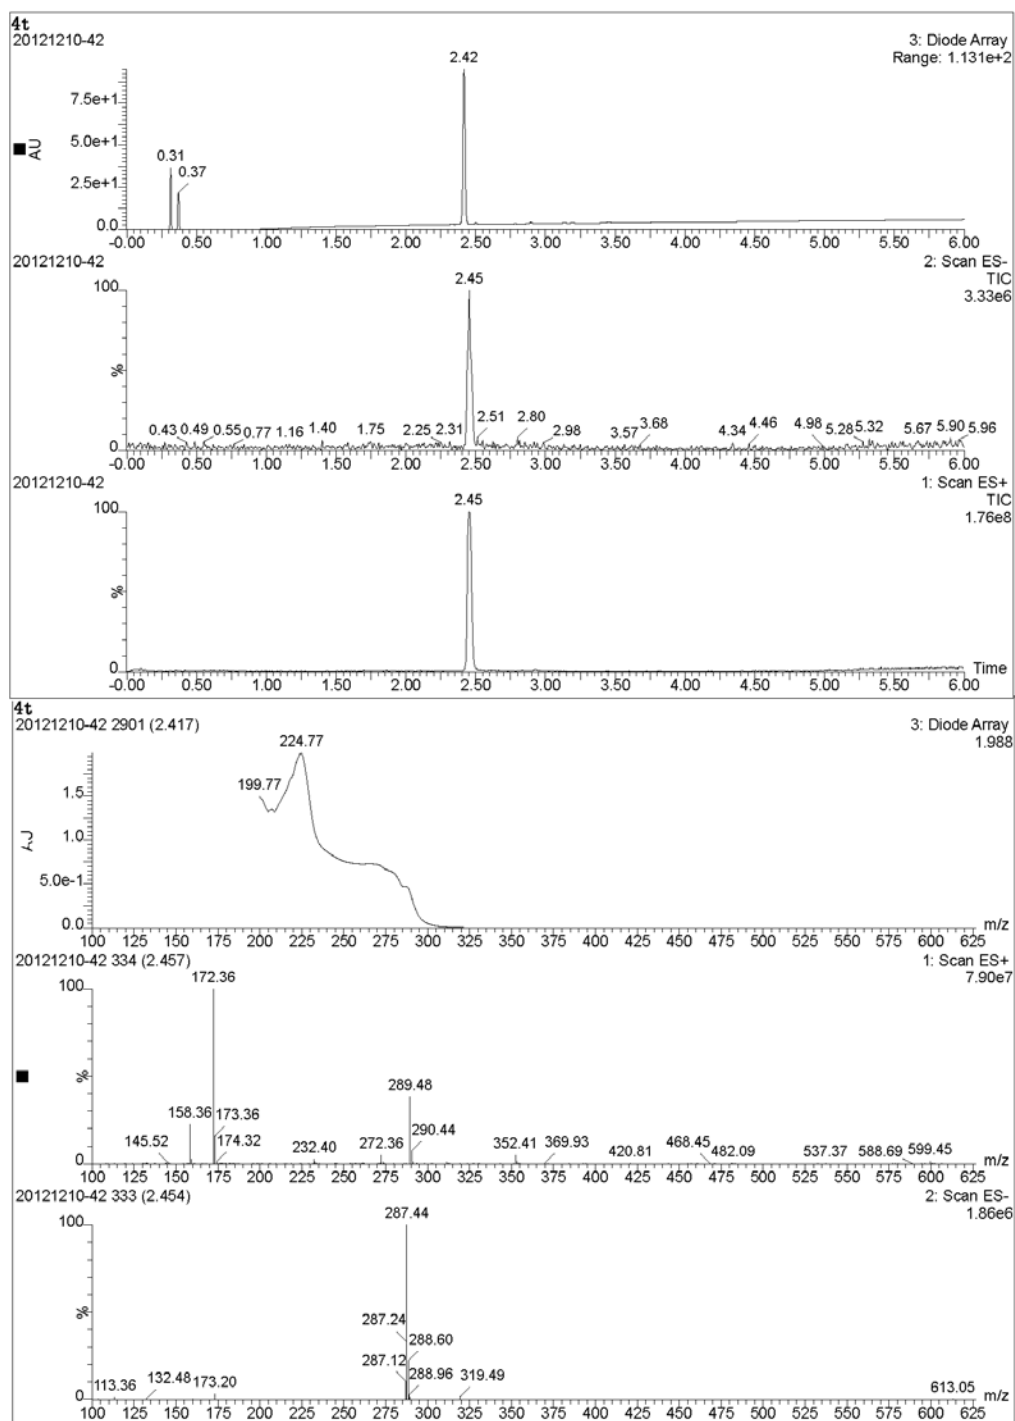

S56.  $^1\text{H}$  NMR spectrum of 2-cyclopropyl-3-(1*H*-indol-3-yl)isoindolin-1-one (**4t**) in  $\text{DMSO}-d_6$ .

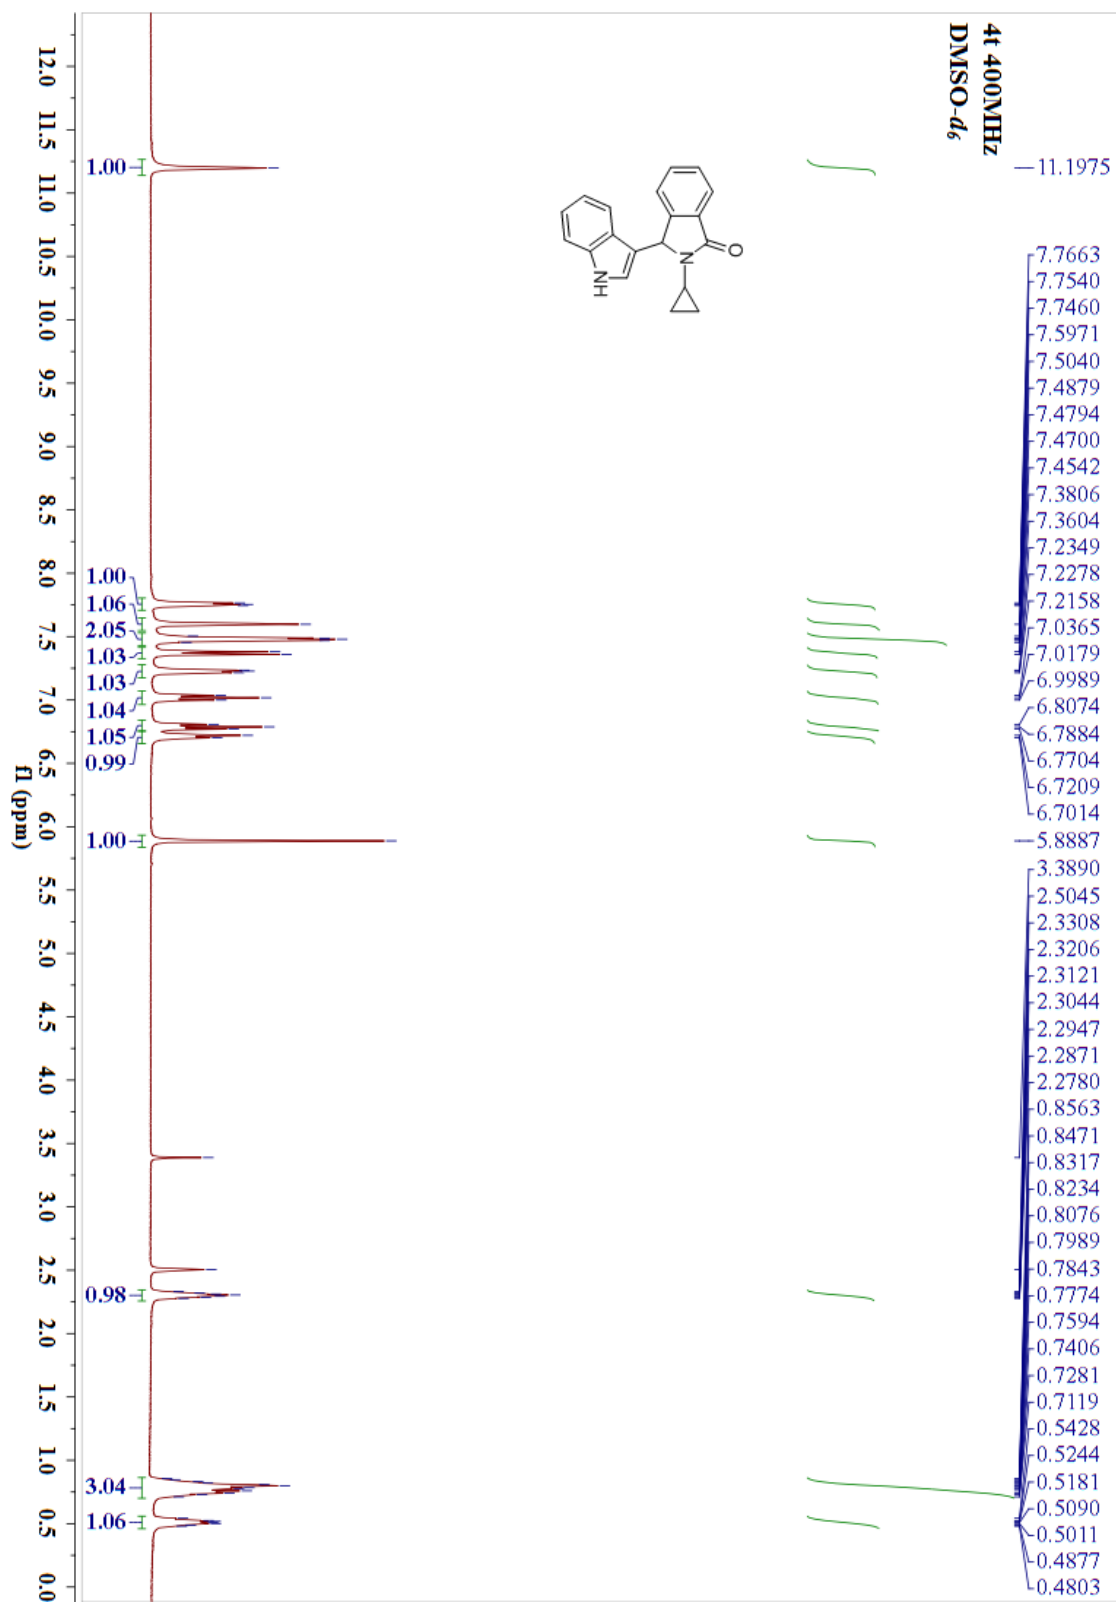



S57.  $^{13}\text{C}$  NMR spectrum of 2-cyclopropyl-3-(1*H*-indol-3-yl)isoindolin-1-one (**4t**) in DMSO- $d_6$ .

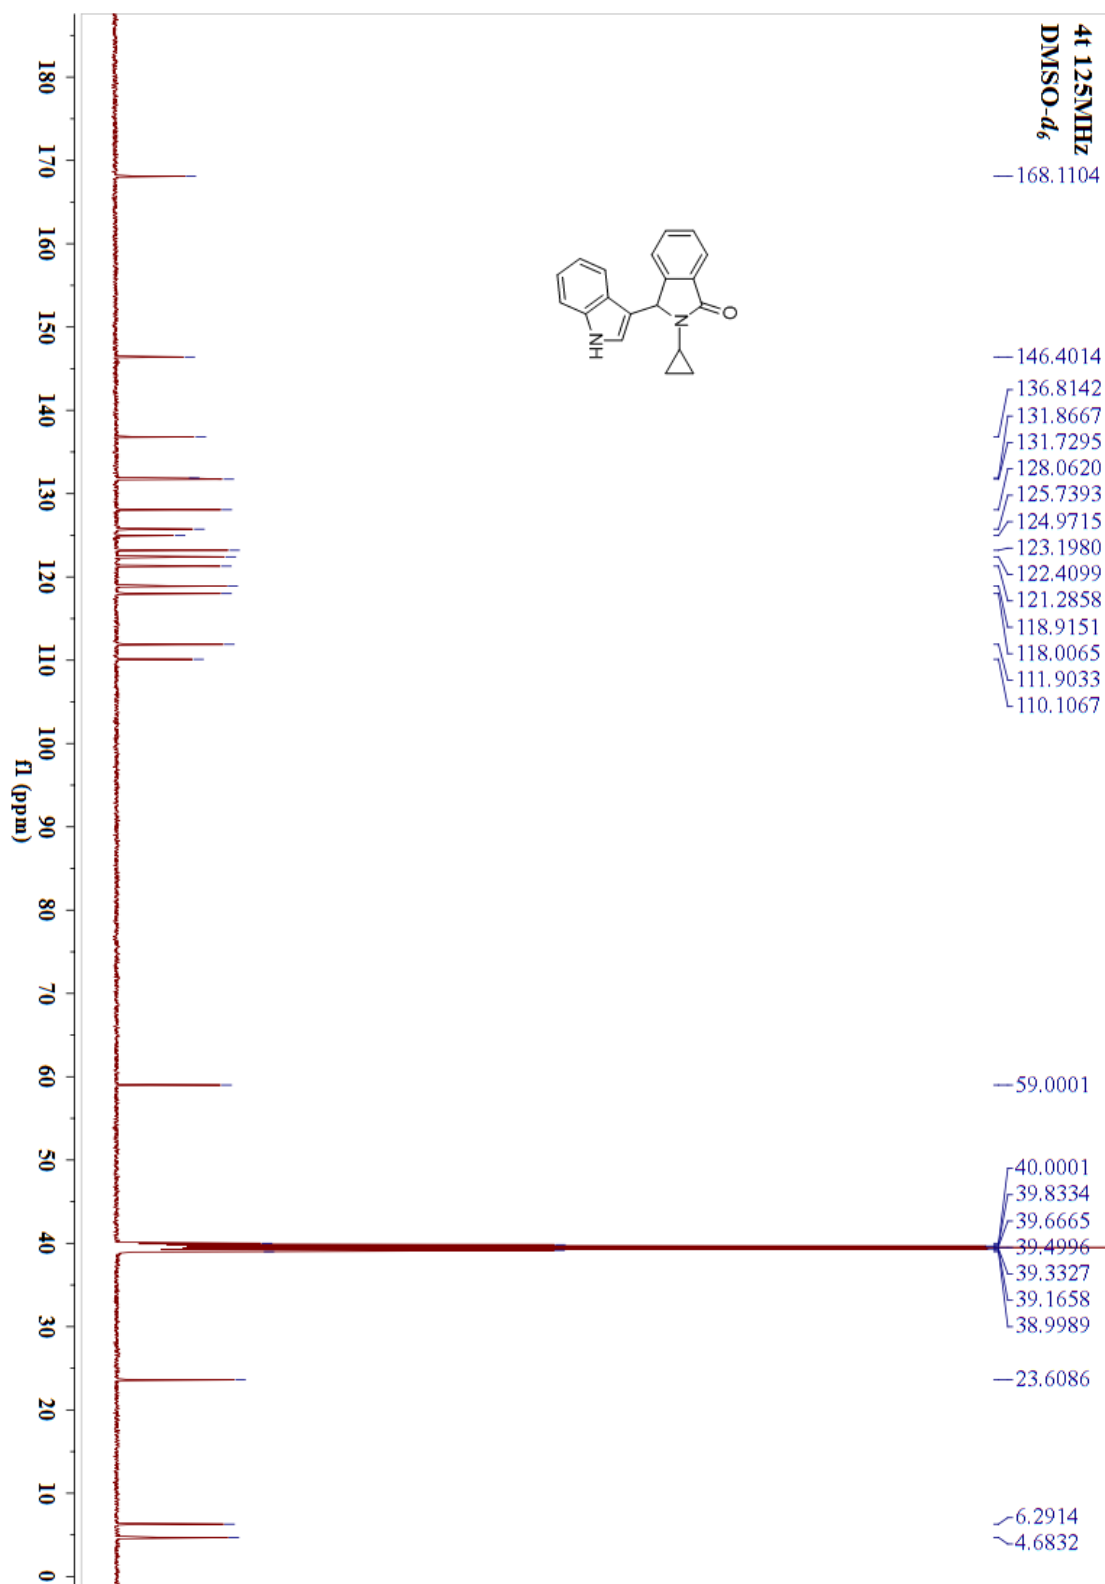

**S58.** LCMS spectrum of 3-(2-benzyl-3-oxoisindolin-1-yl)-1*H*-indole-5-carbonitrile  
(**4u**).

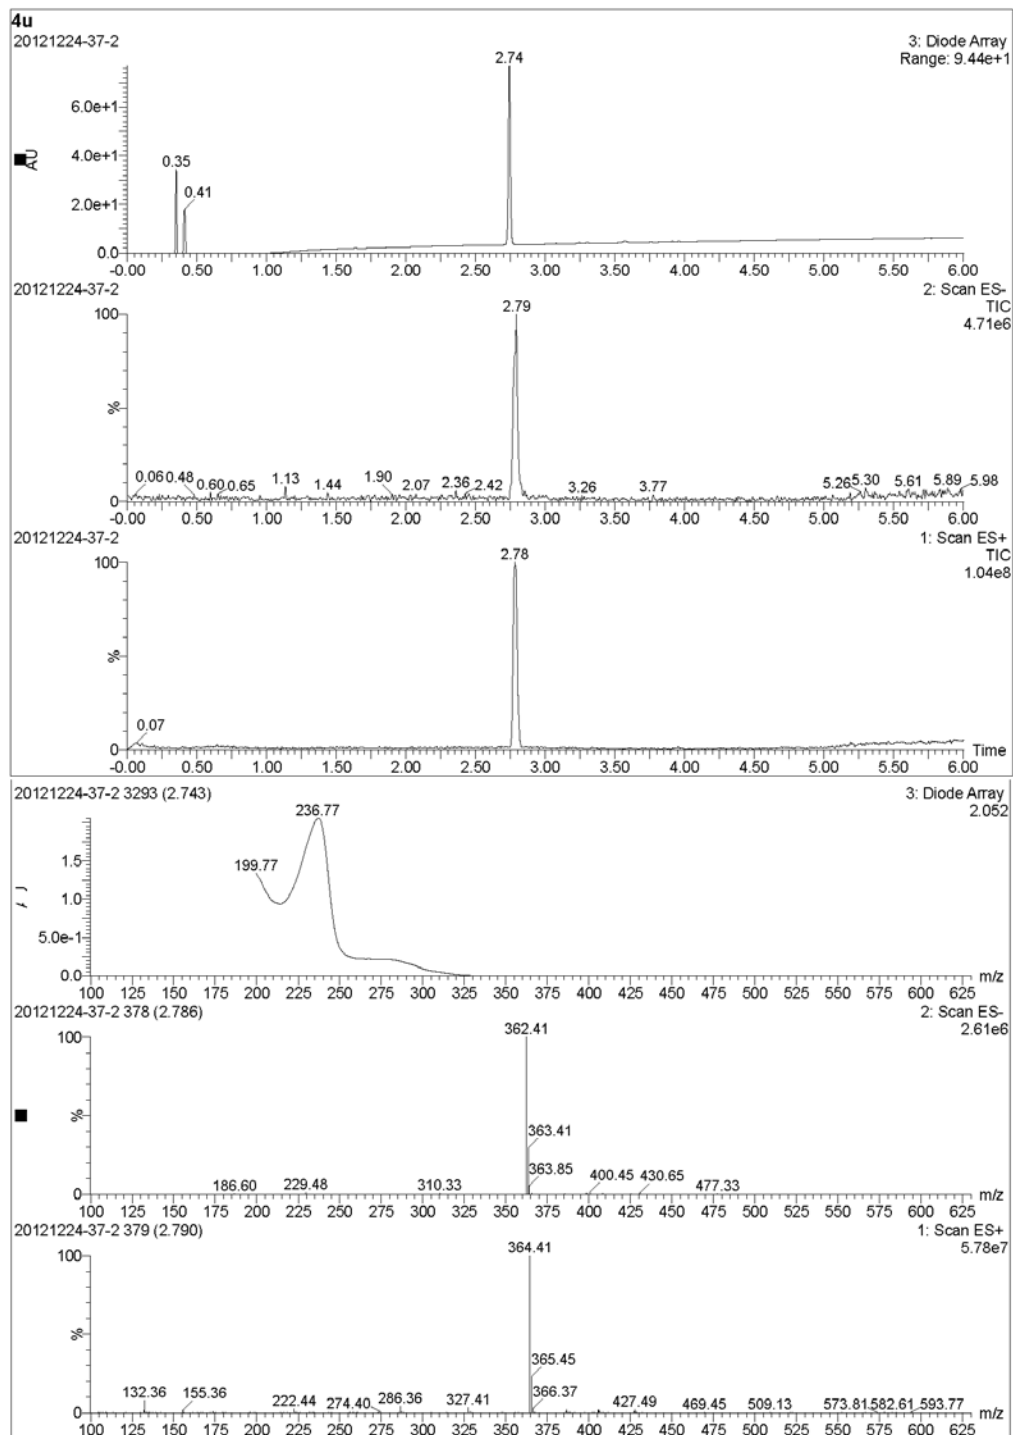

**S59.**  $^1\text{H}$  NMR spectrum of 3-(2-benzyl-3-oxoisindolin-1-yl)-1*H*-indole-5-carbonitrile (**4u**) in  $\text{DMSO-}d_6$ .

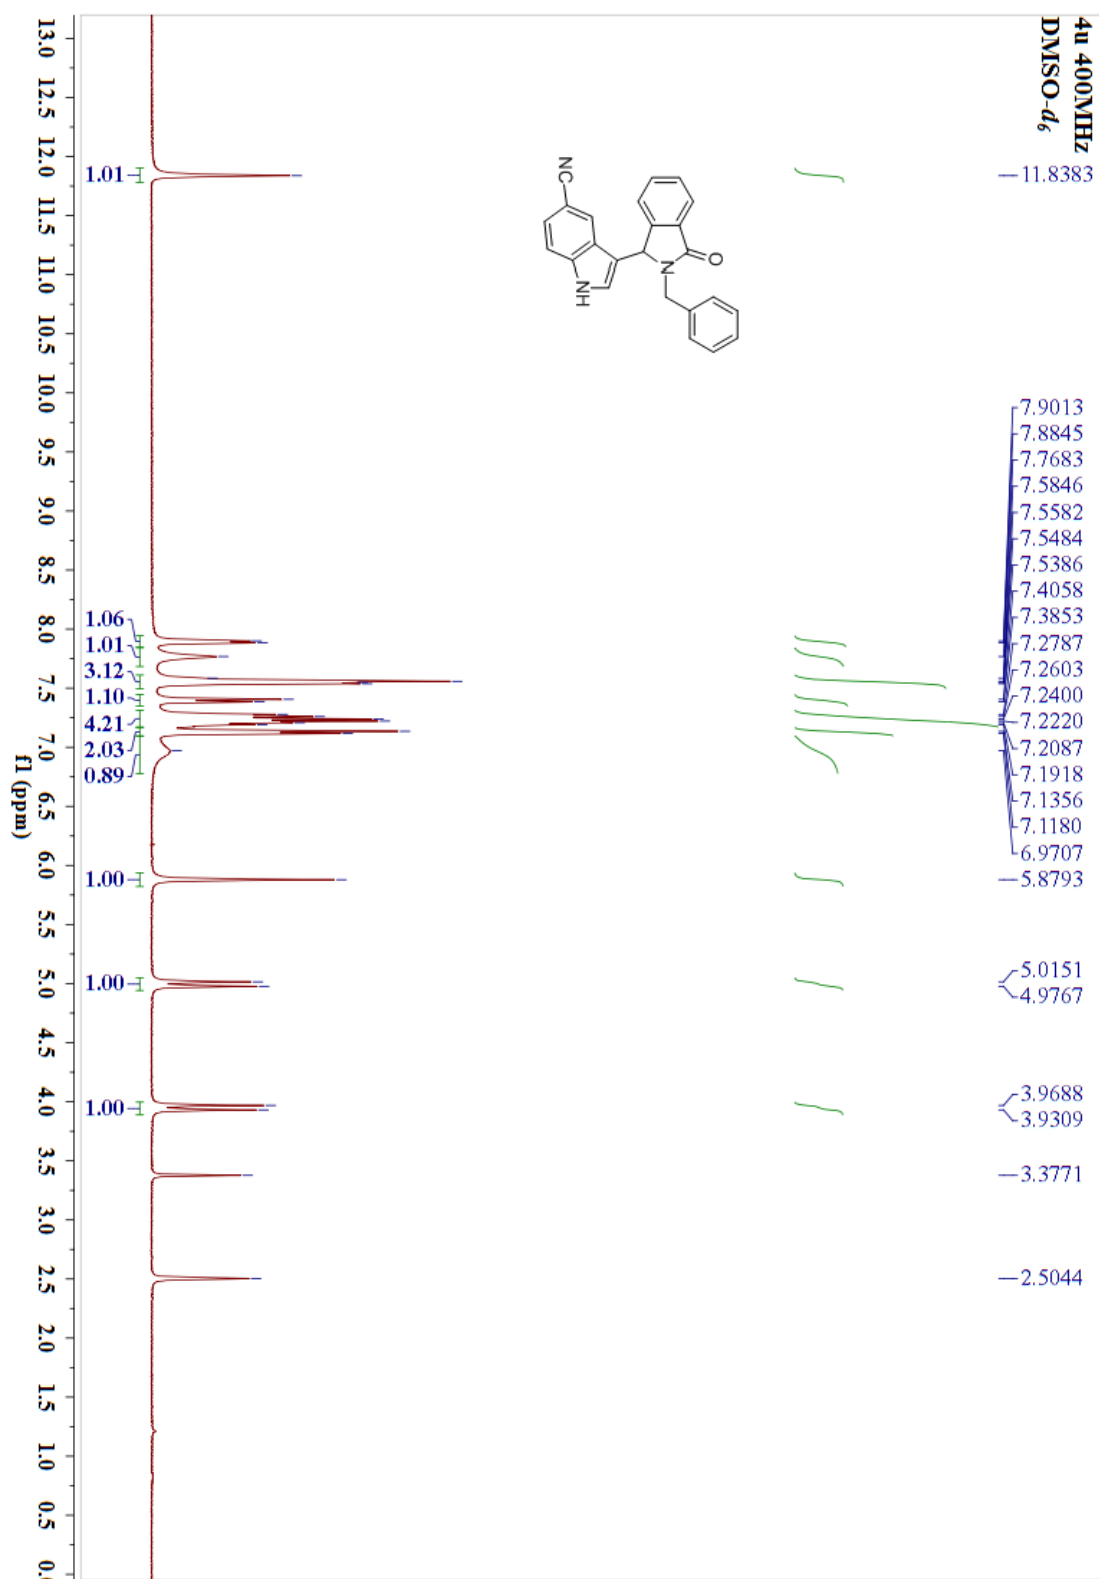

S60.  $^{13}\text{C}$  NMR spectrum of  
3-(2-benzyl-3-oxoisoindolin-1-yl)-1*H*-indole-5-carbonitrile (**4u**) in  $\text{DMSO-}d_6$ .

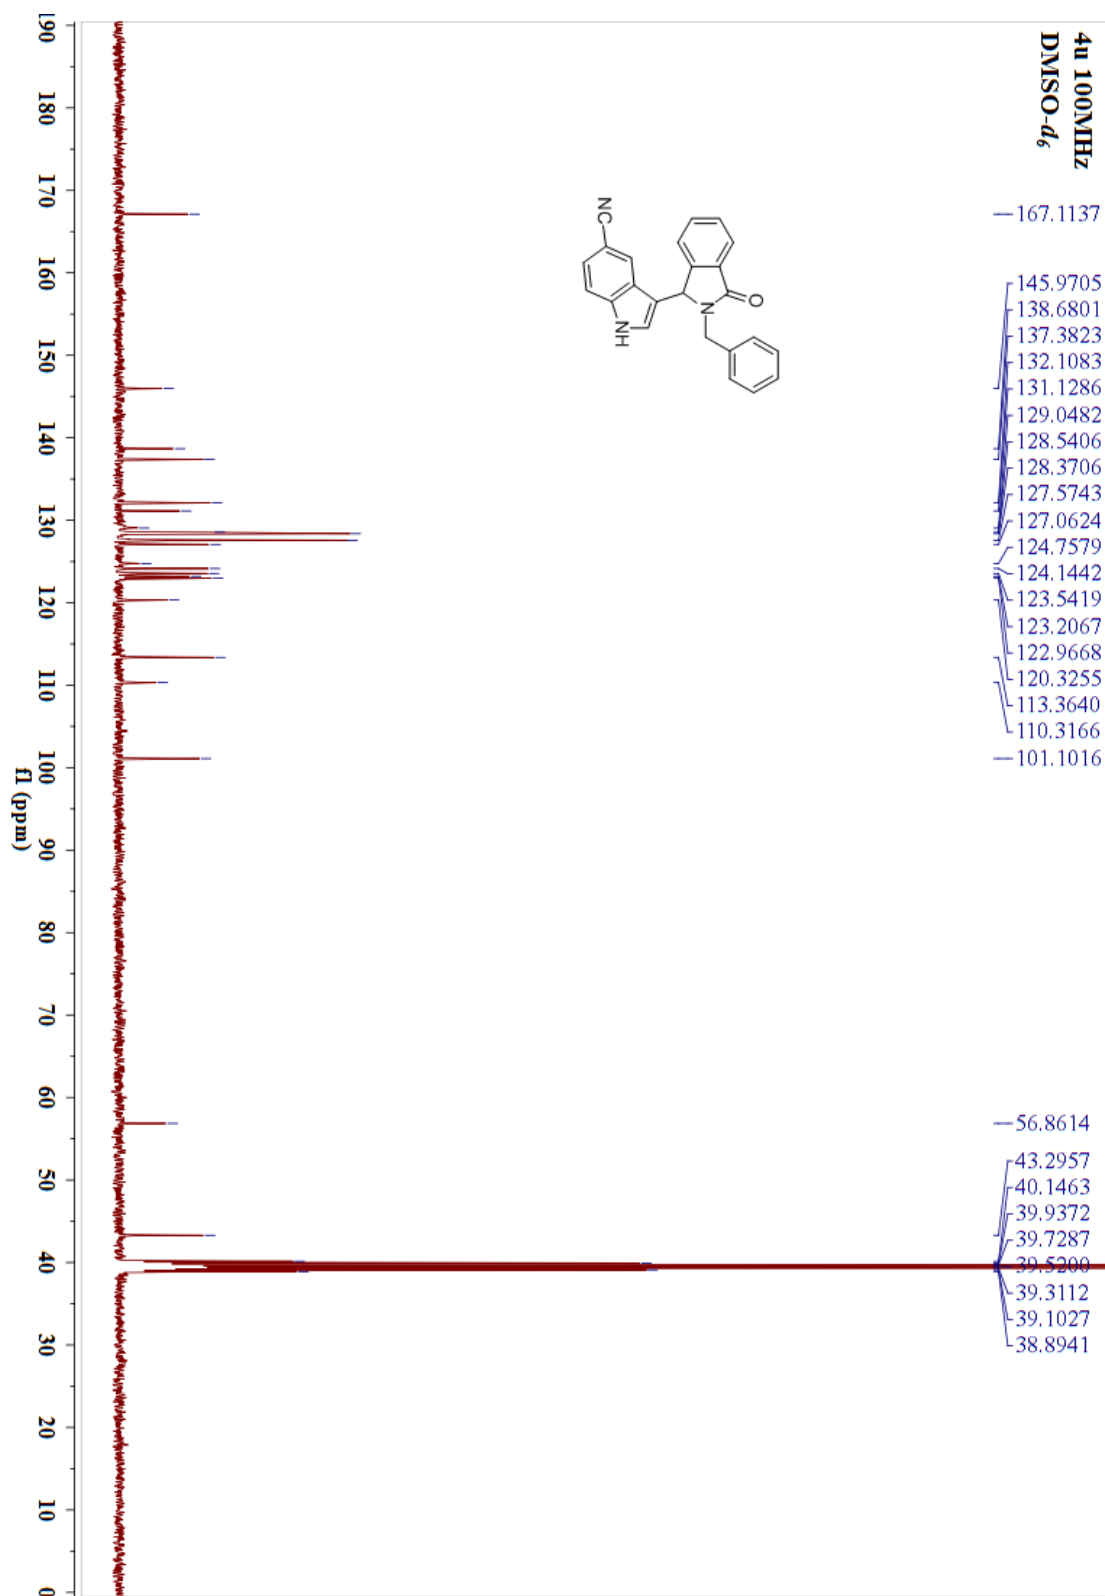

**S61.** LCMS spectrum of 3-(2-butyl-3-oxoisindolin-1-yl)-1*H*-indole-5-carbonitrile  
(4v).

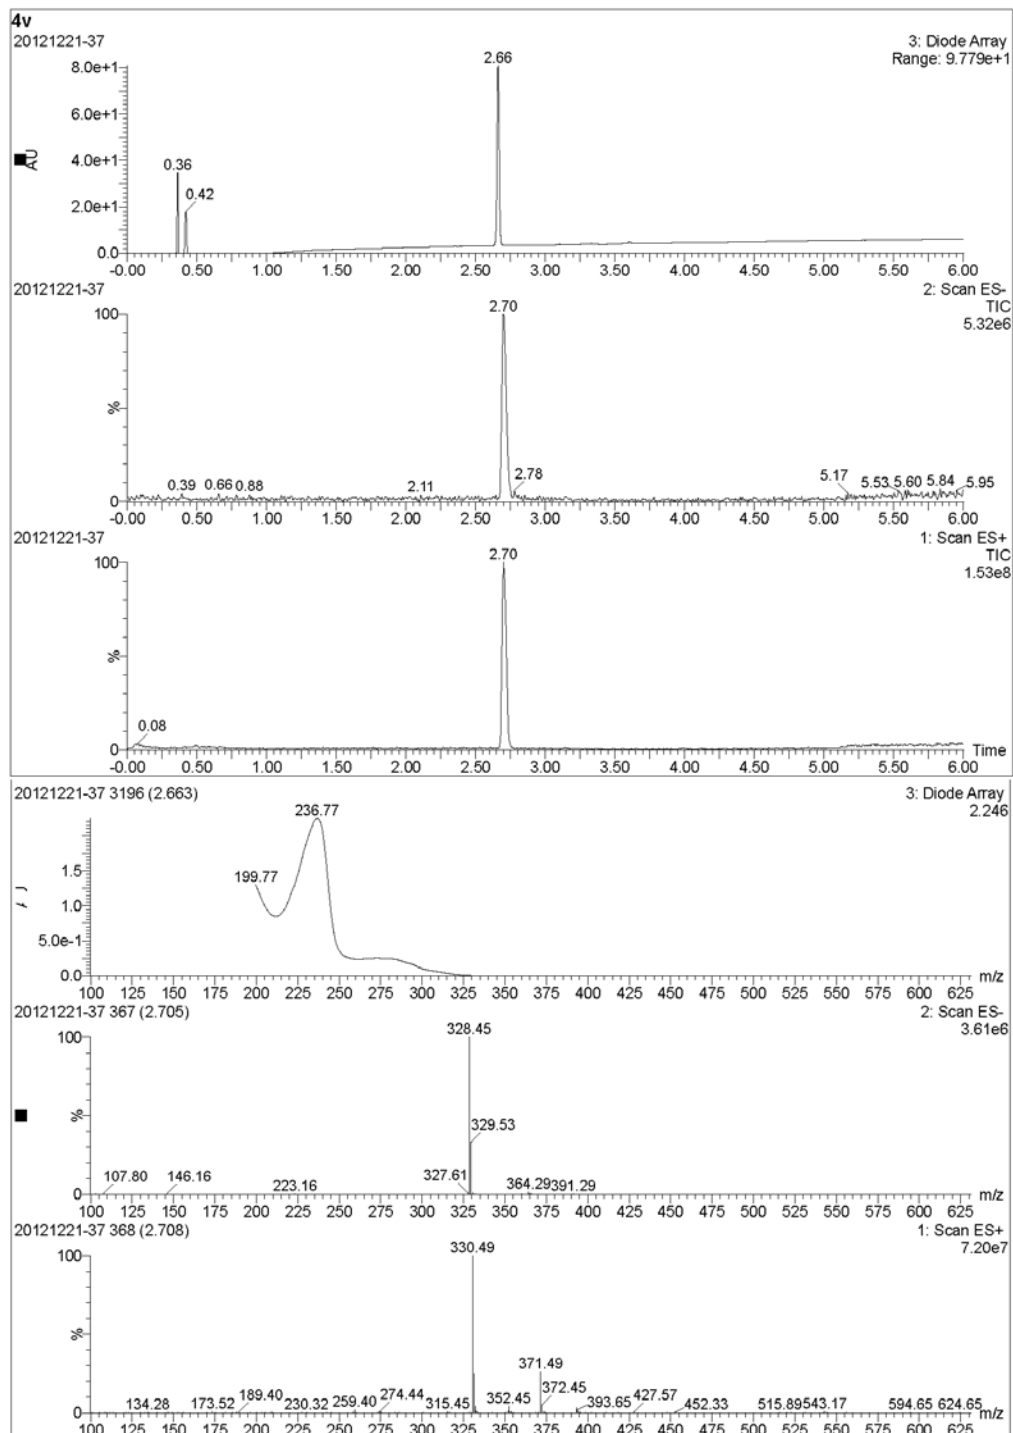

**S62.**  $^1\text{H}$  NMR spectrum of 3-(2-butyl-3-oxoisindolin-1-yl)-1*H*-indole-5-carbonitrile (**4v**) in  $\text{DMSO-}d_6$ .

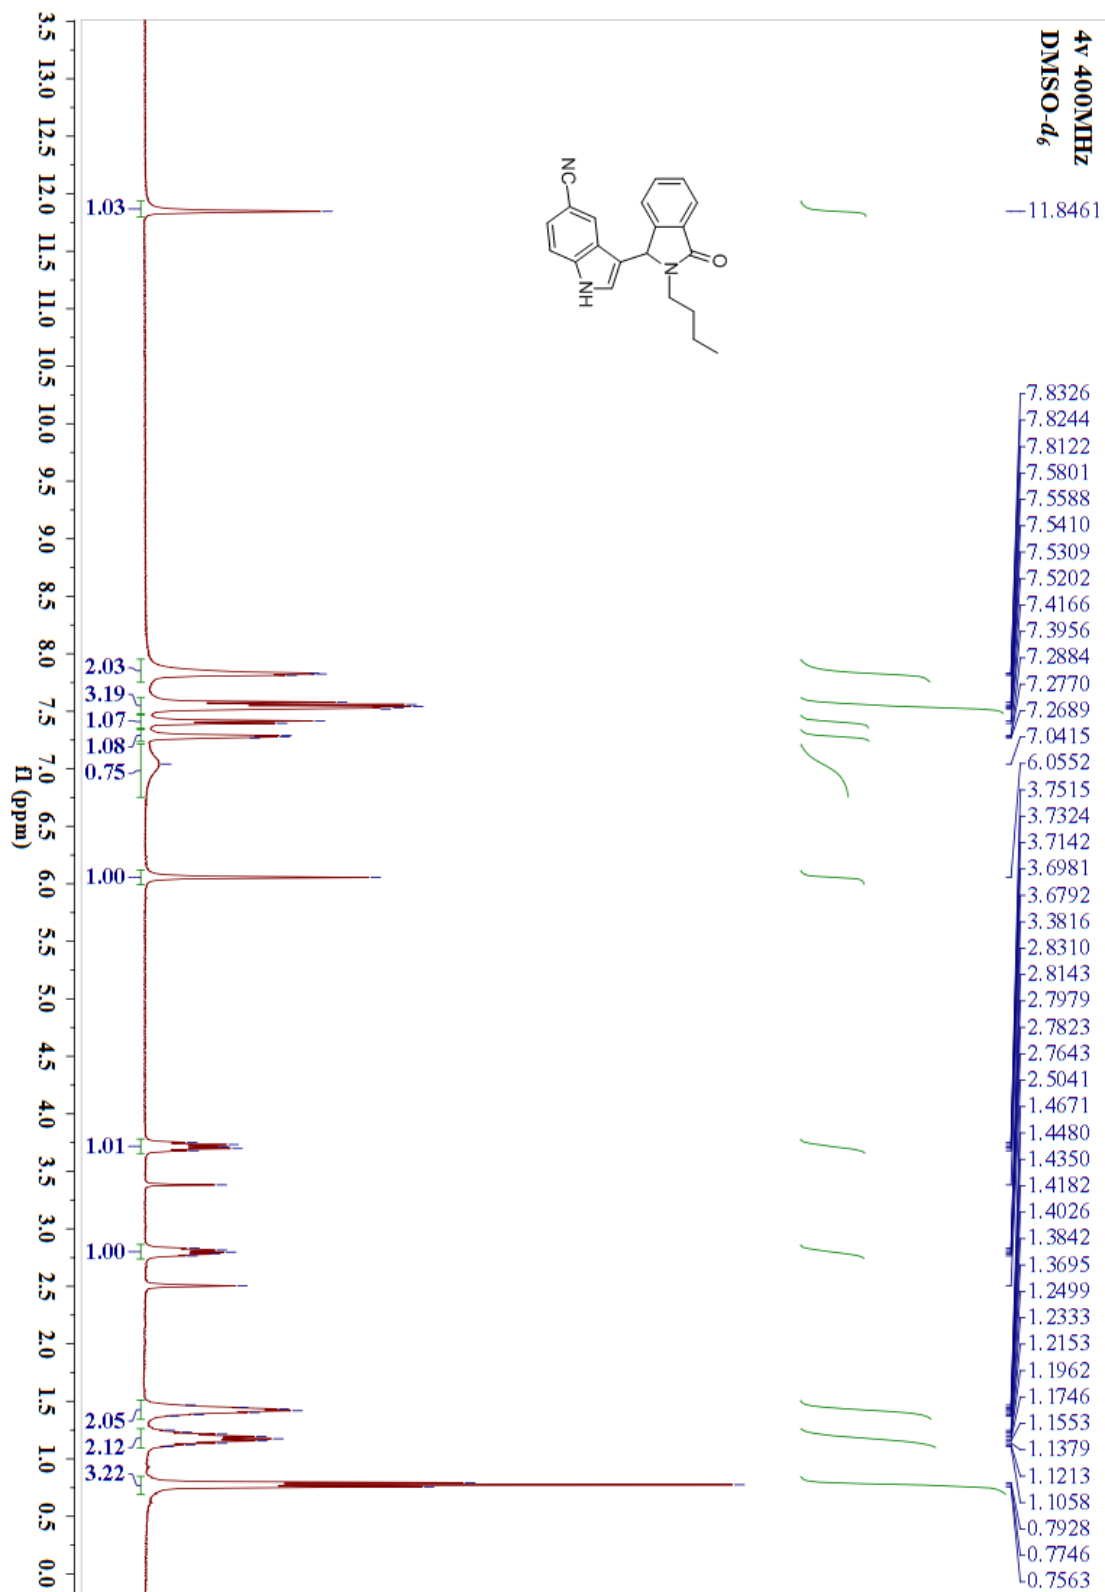

**S63.**  $^{13}\text{C}$  NMR spectrum of 3-(2-butyl-3-oxoisindolin-1-yl)-1*H*-indole-5-carbonitrile  
(**4v**) in  $\text{DMSO-}d_6$ .

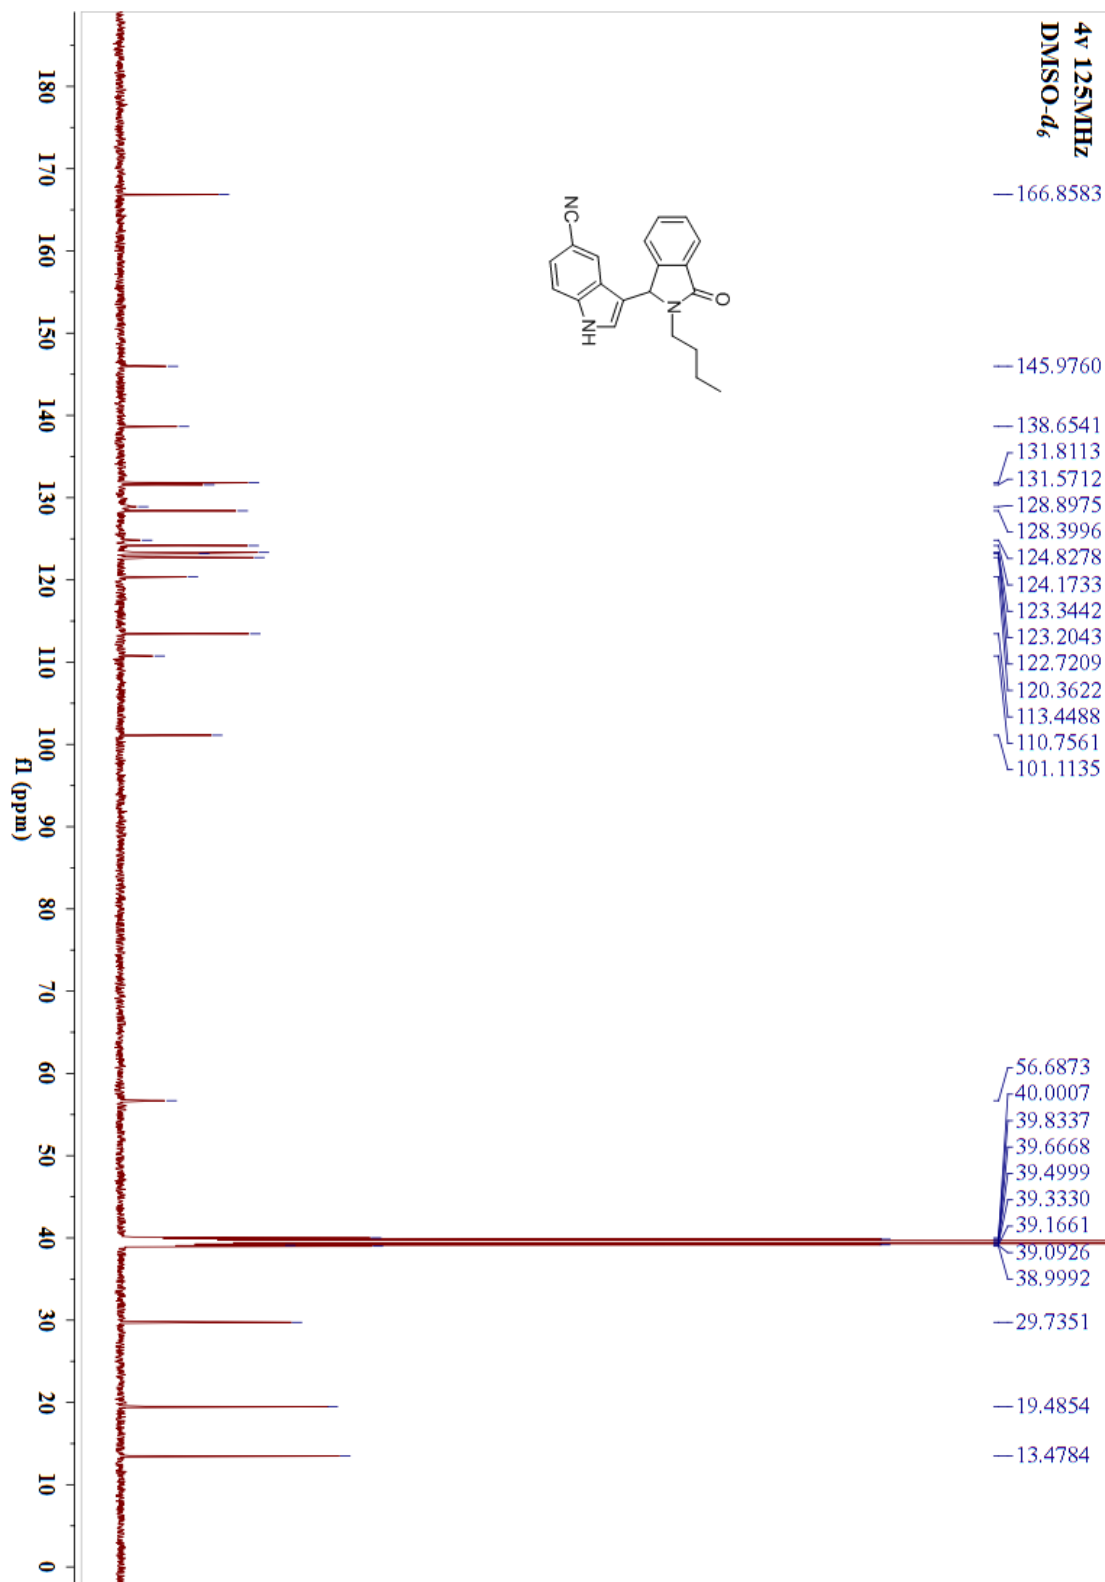

S64. LCMS spectrum of  
3-(2-cyclopentyl-3-oxoisindolin-1-yl)-1*H*-indole-5-carbonitrile (**4w**).

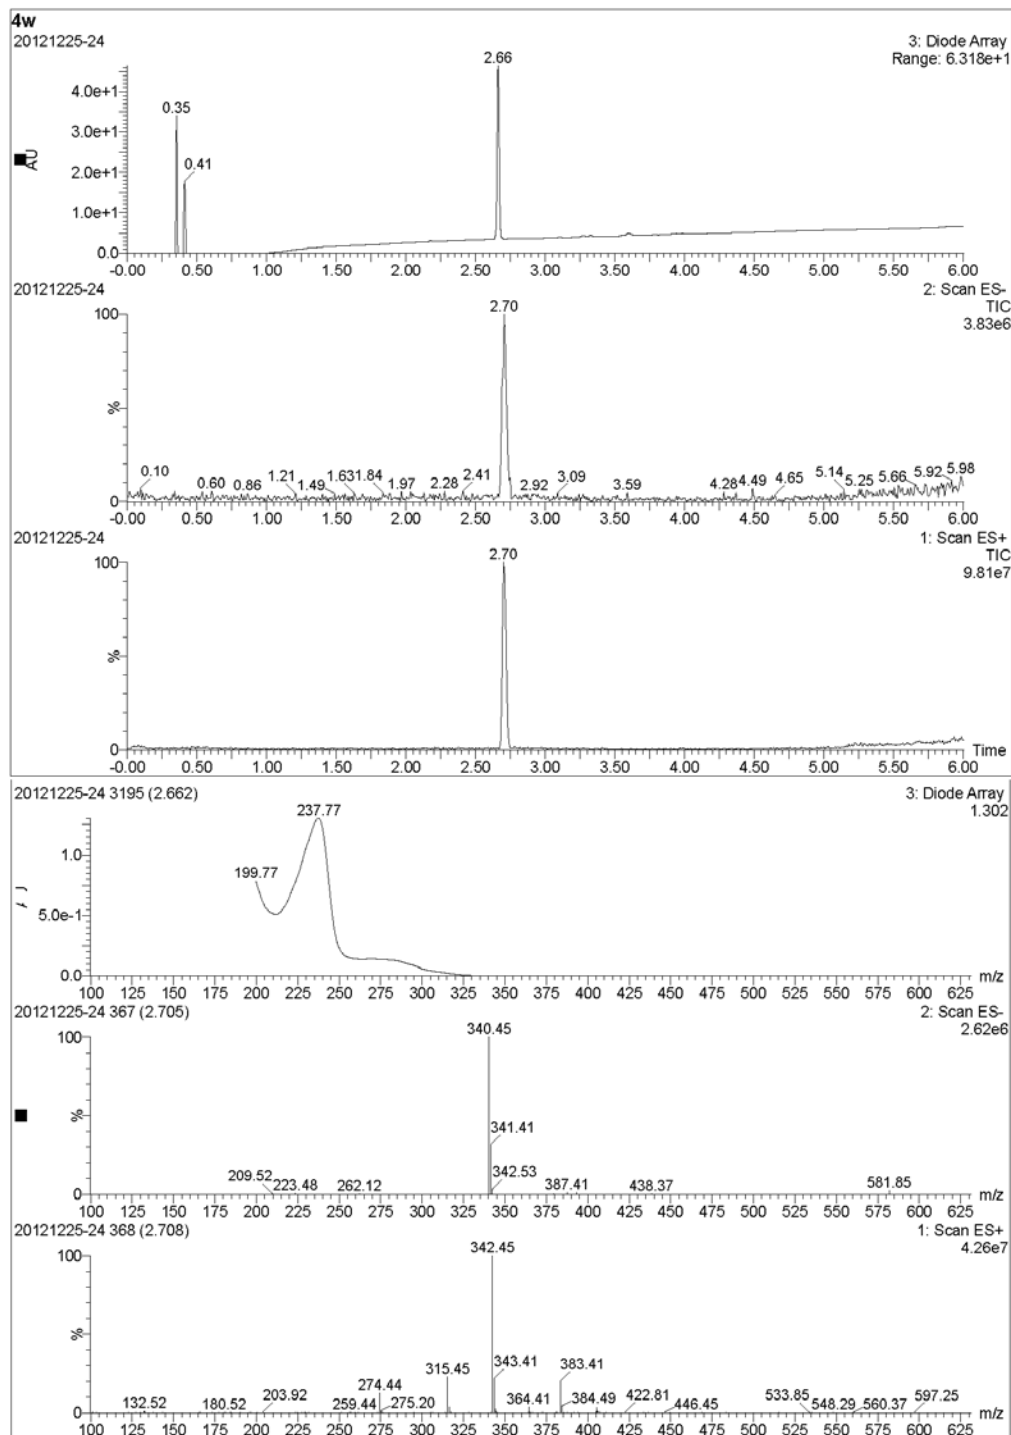



S65.  $^1\text{H}$  NMR spectrum of  
3-(2-cyclopentyl-3-oxoisindolin-1-yl)-1*H*-indole-5-carbonitrile (**4w**) in  $\text{DMSO-}d_6$ .

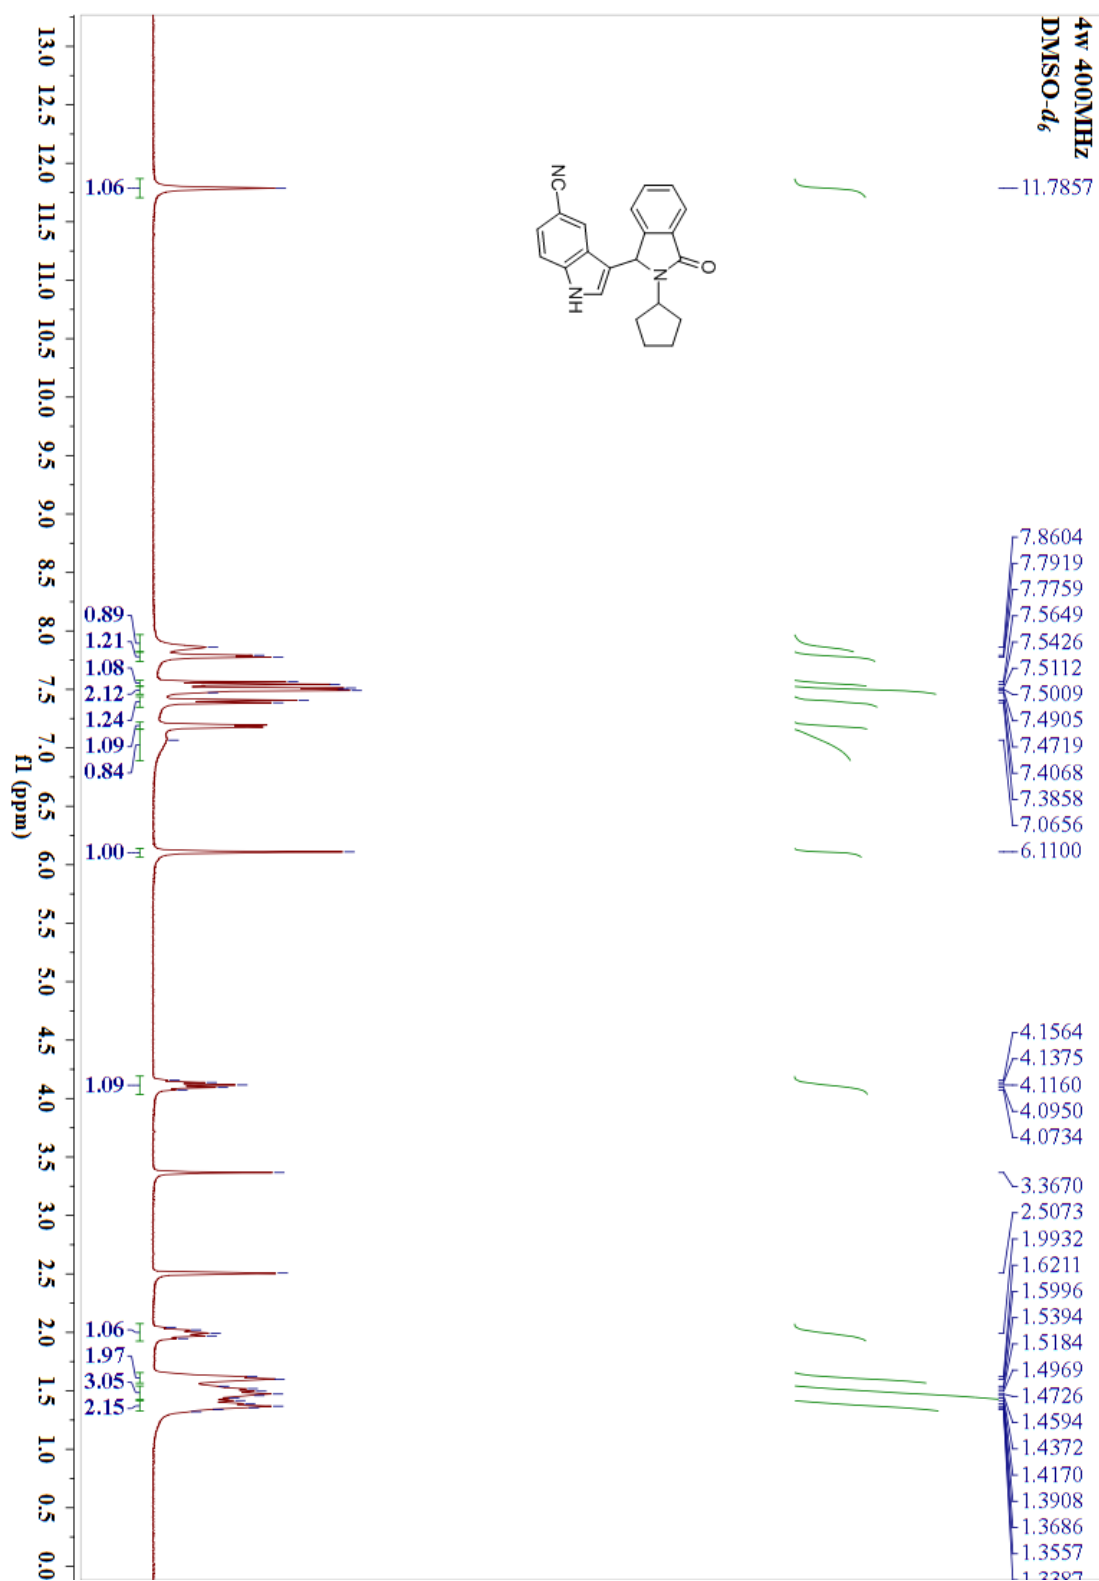

S66.  $^{13}\text{C}$  NMR spectrum of  
3-(2-cyclopentyl-3-oxoisindolin-1-yl)-1H-indole-5-carbonitrile (**4w**) in  $\text{DMSO-}d_6$ .

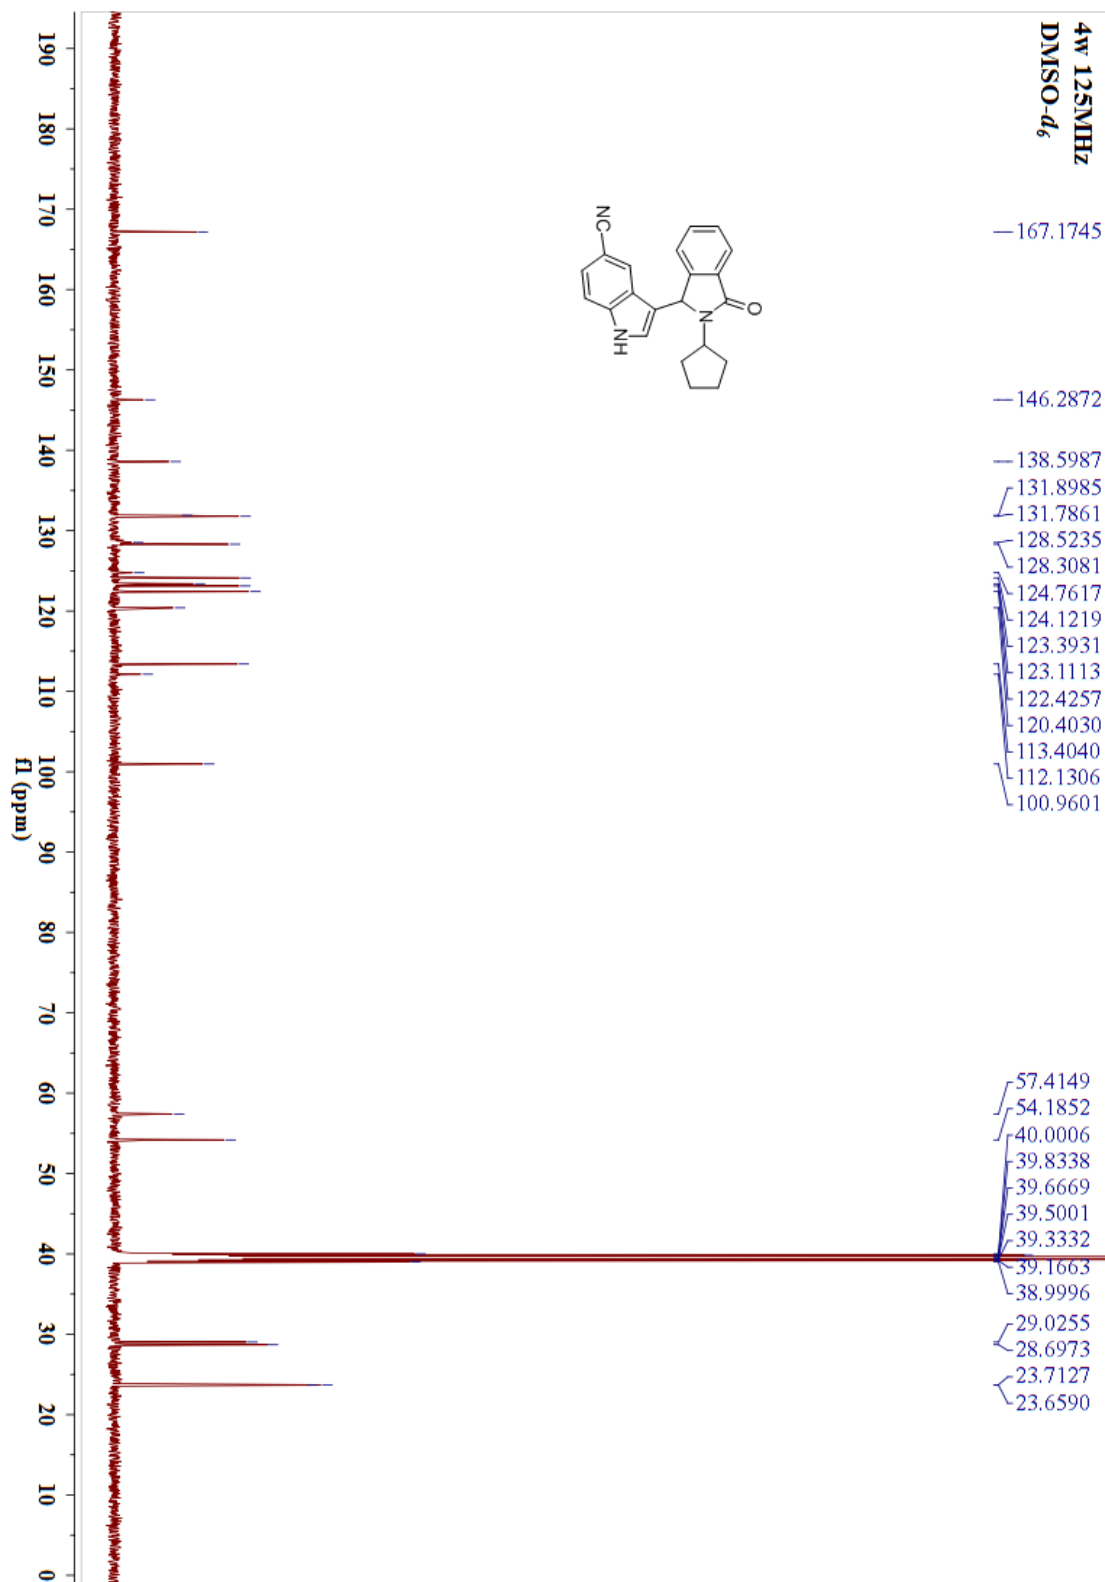

S67. LCMS spectrum of 2-benzyl-3-(6-nitro-1*H*-indol-3-yl)isoindolin-1-one (**4x**).

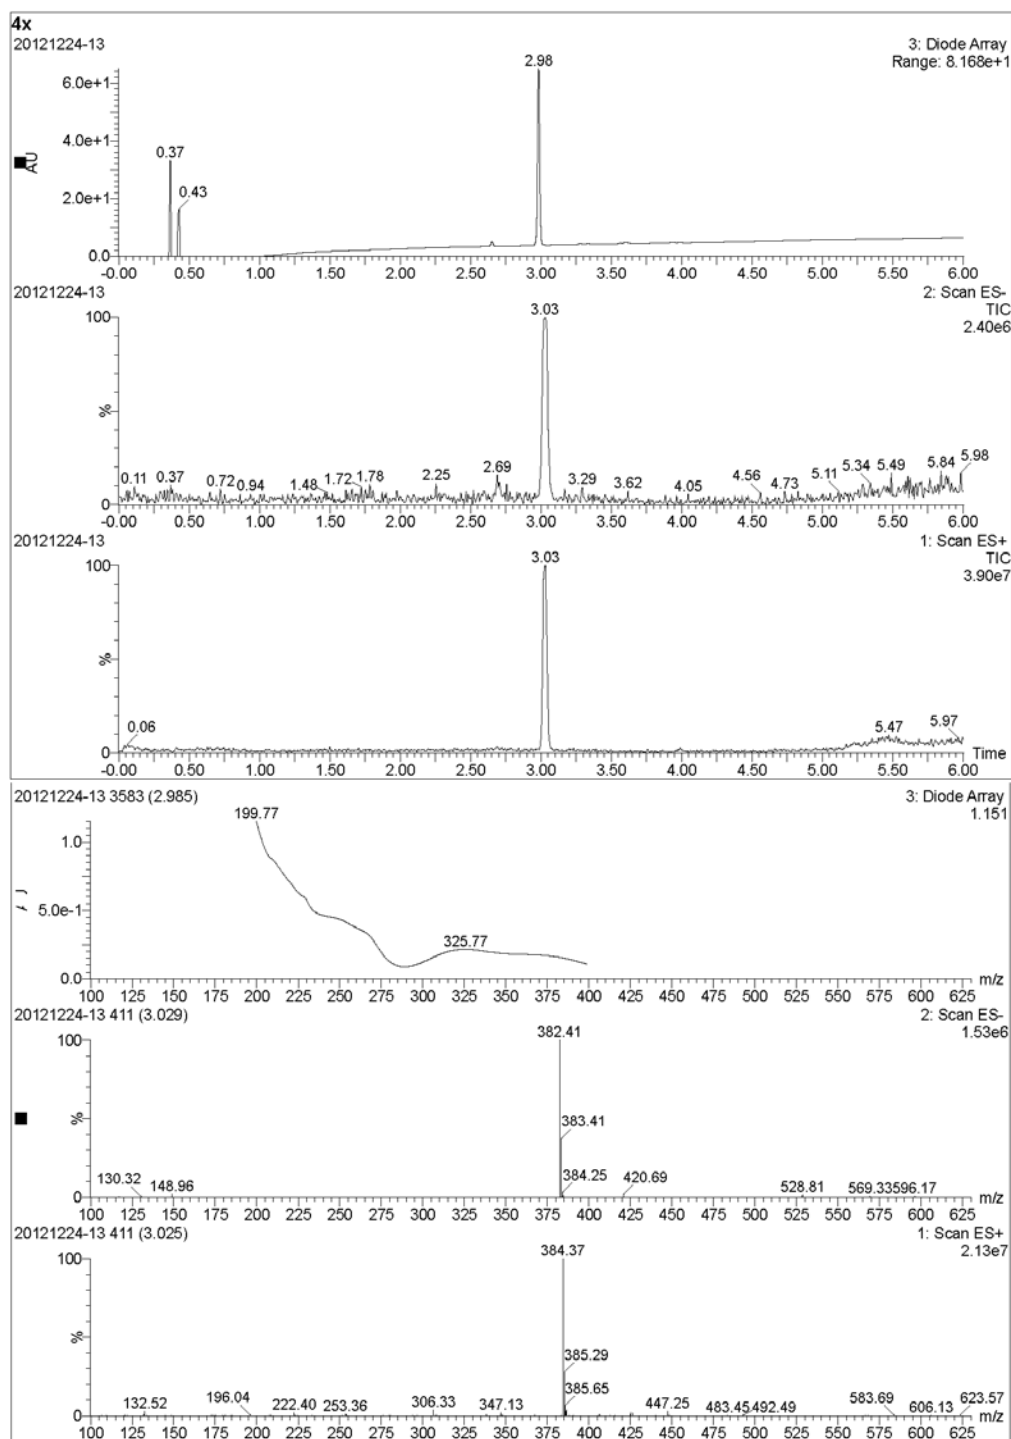

S68.  $^1\text{H}$  NMR spectrum of 2-benzyl-3-(6-nitro-1*H*-indol-3-yl)isoindolin-1-one (**4x**) in  $\text{DMSO-}d_6$ .

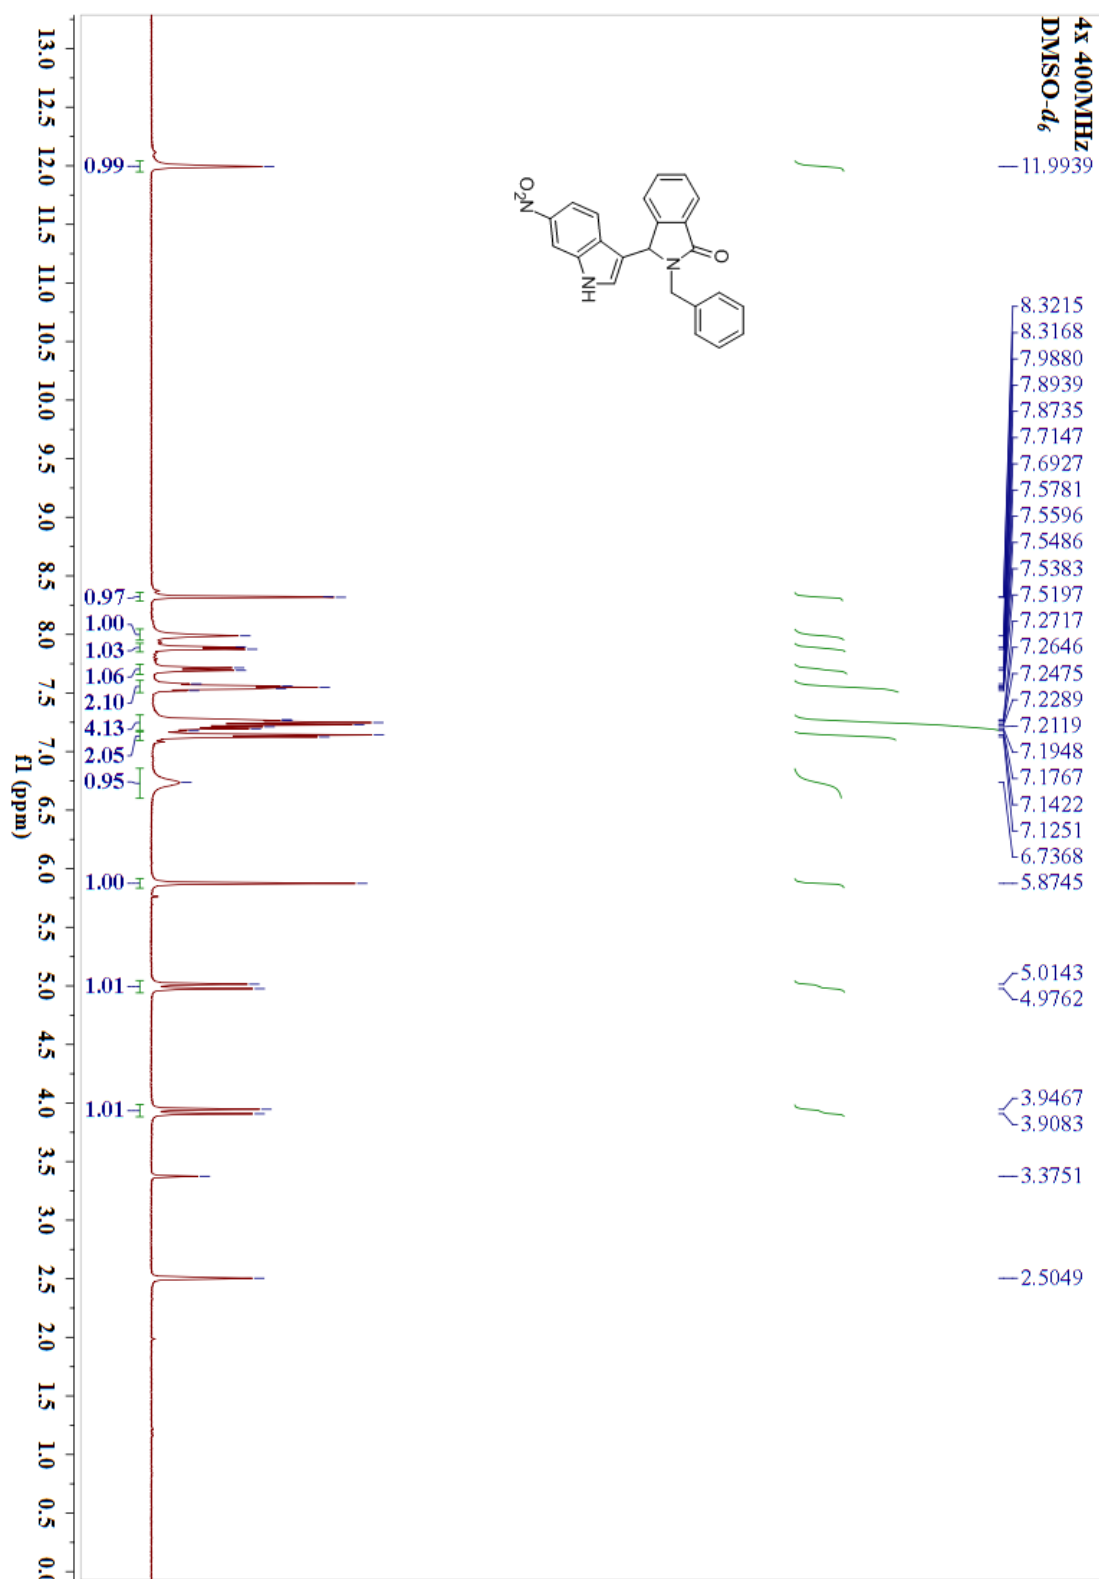

**S69.**  $^{13}\text{C}$  NMR spectrum of 2-benzyl-3-(6-nitro-1*H*-indol-3-yl)isoindolin-1-one (**4x**) in DMSO- $d_6$ .

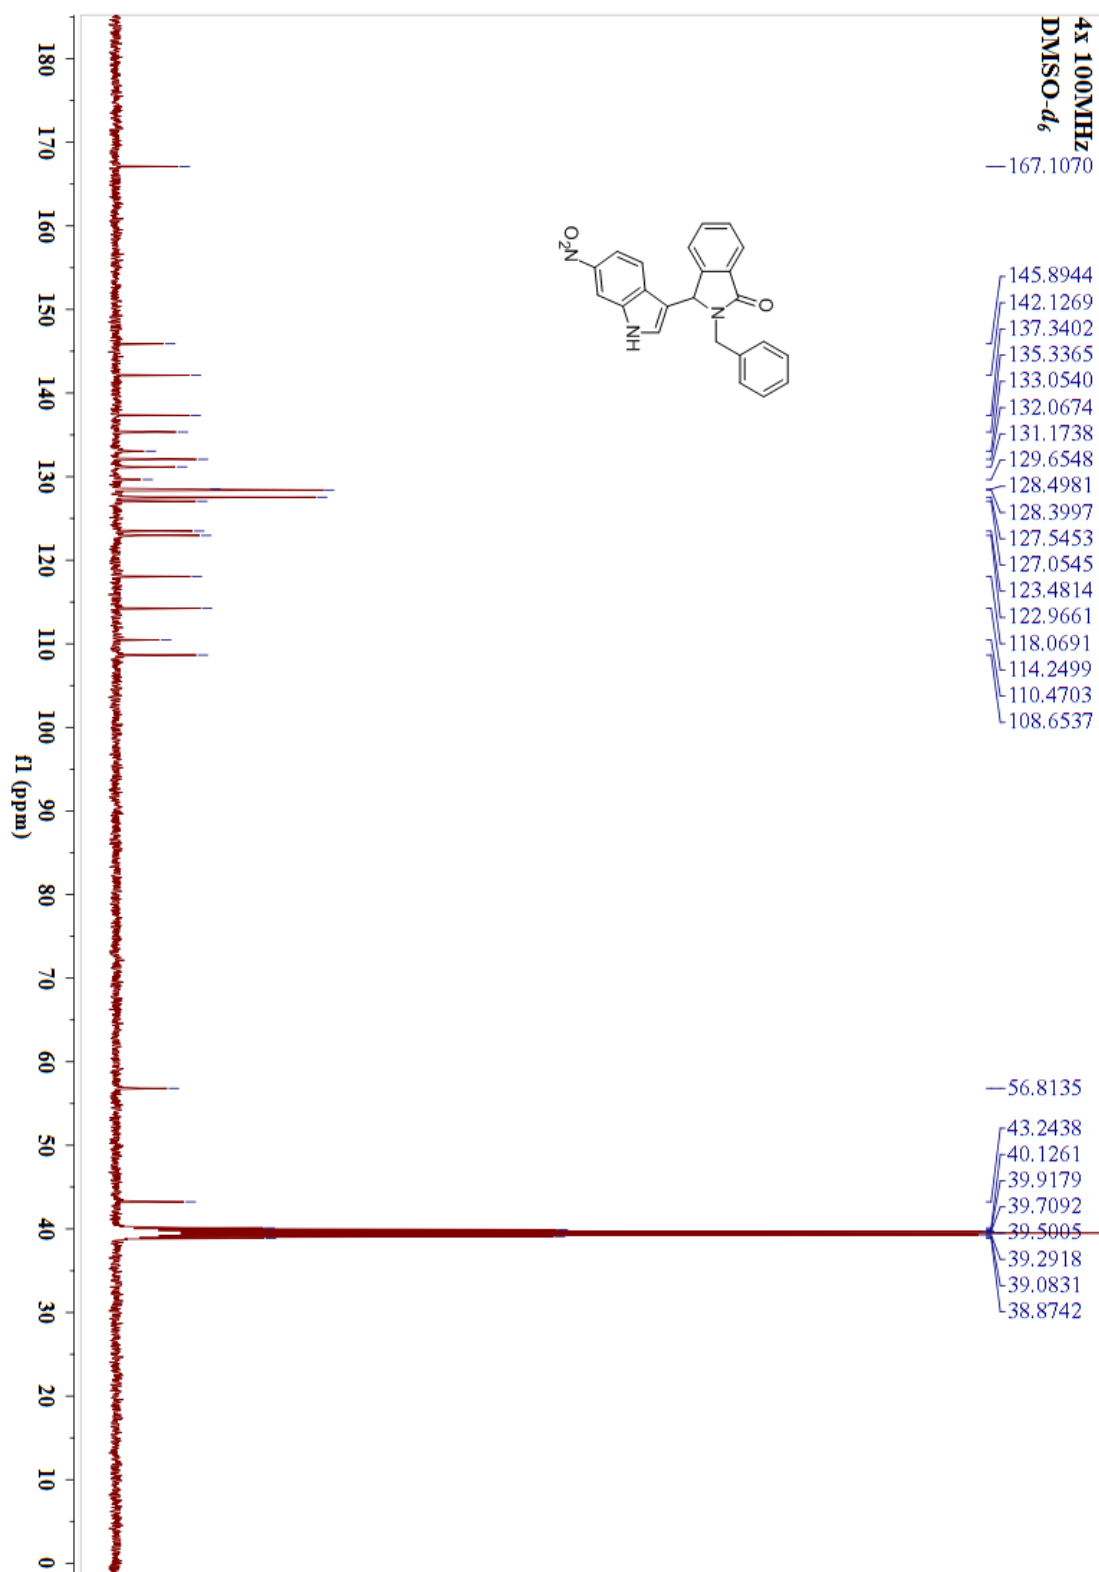

**S70.** LCMS spectrum of 2-benzyl-3-(5-methyl-1*H*-indol-3-yl)isoindolin-1-one (**4y**).

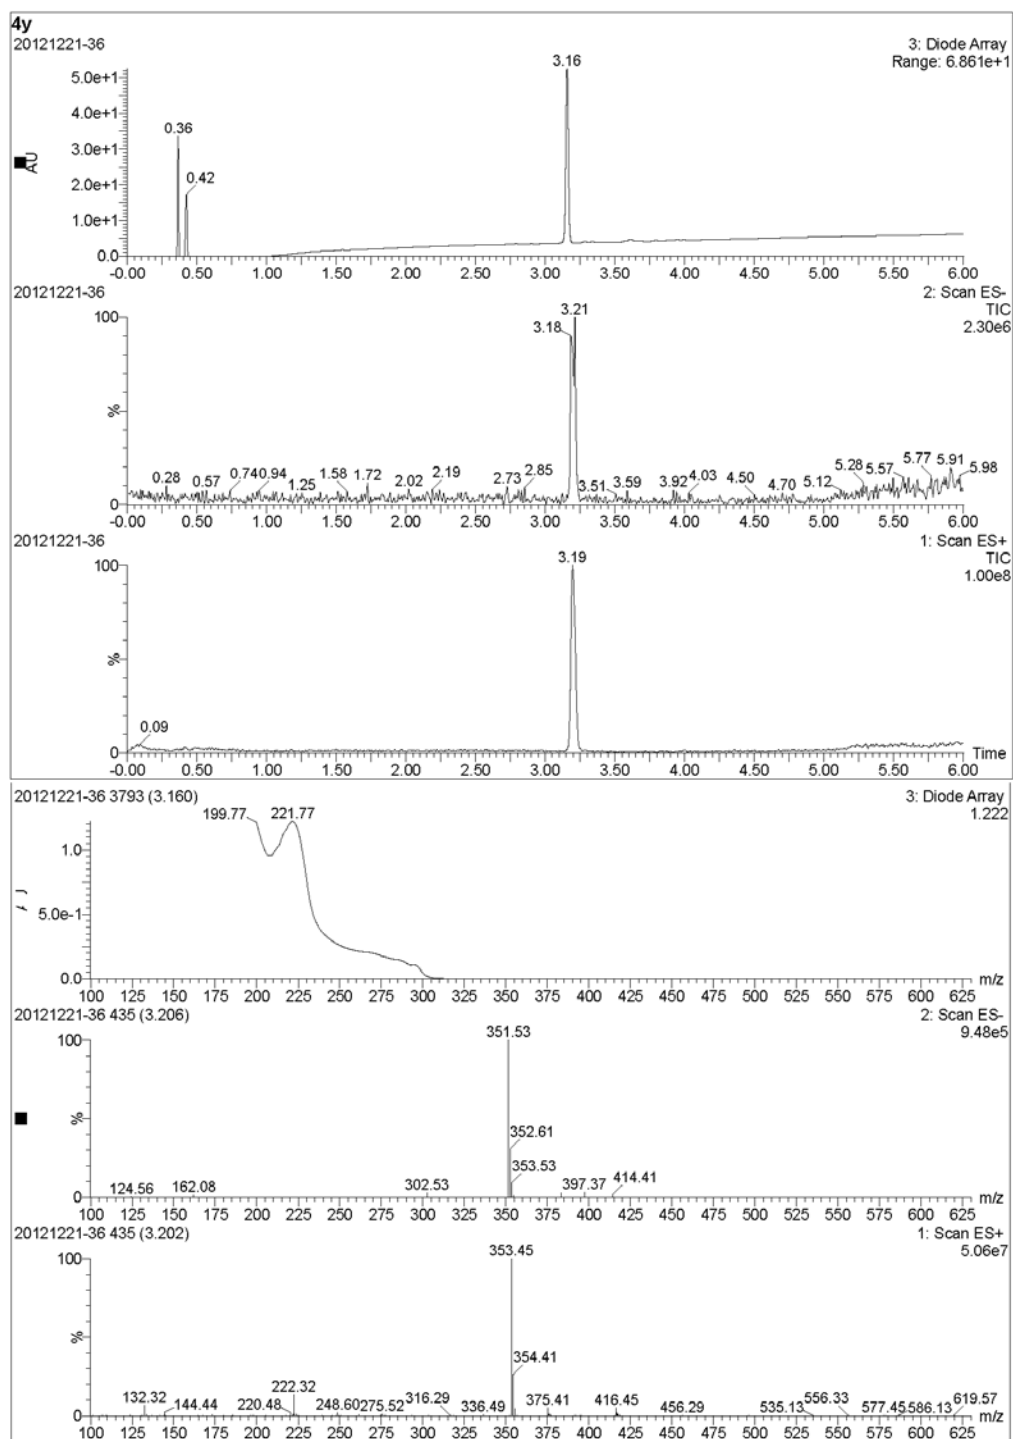

**S71.**  $^1\text{H}$  NMR spectrum of 2-benzyl-3-(5-methyl-1*H*-indol-3-yl)isoindolin-1-one (**4y**)  
in  $\text{DMSO-}d_6$ .

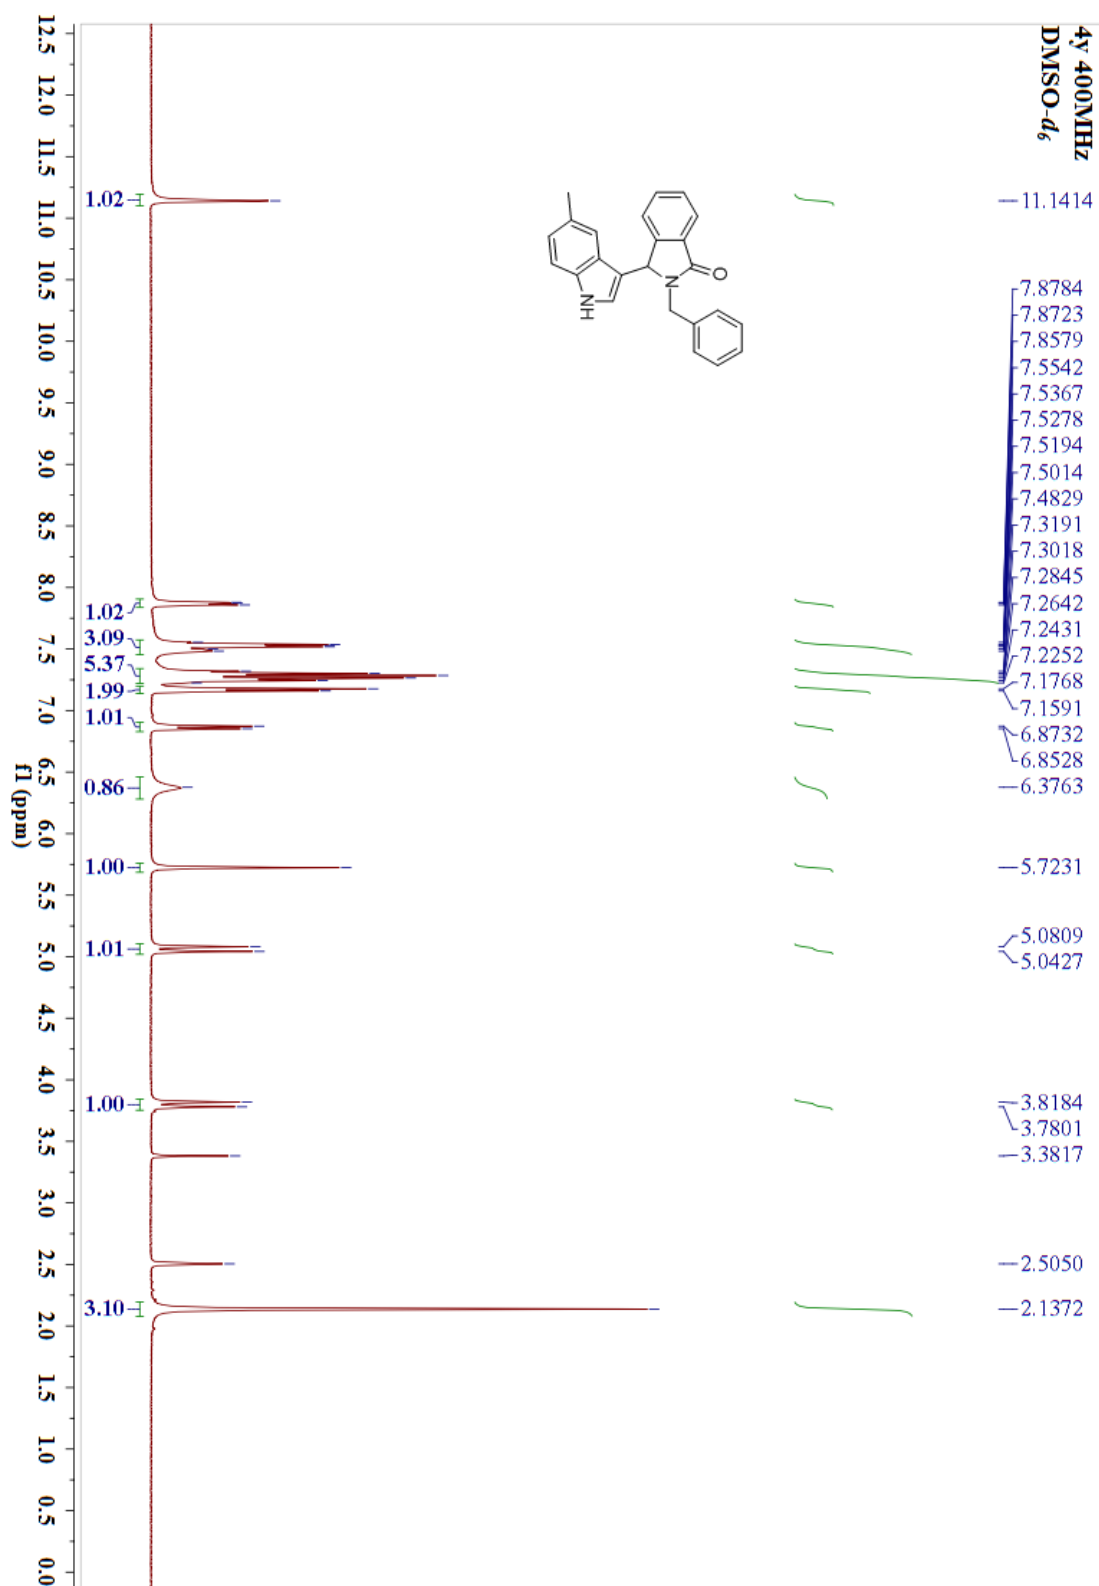

**S72.**  $^{13}\text{C}$  NMR spectrum of 2-benzyl-3-(5-methyl-1*H*-indol-3-yl)isoindolin-1-one (**4y**)  
in  $\text{DMSO-}d_6$ .

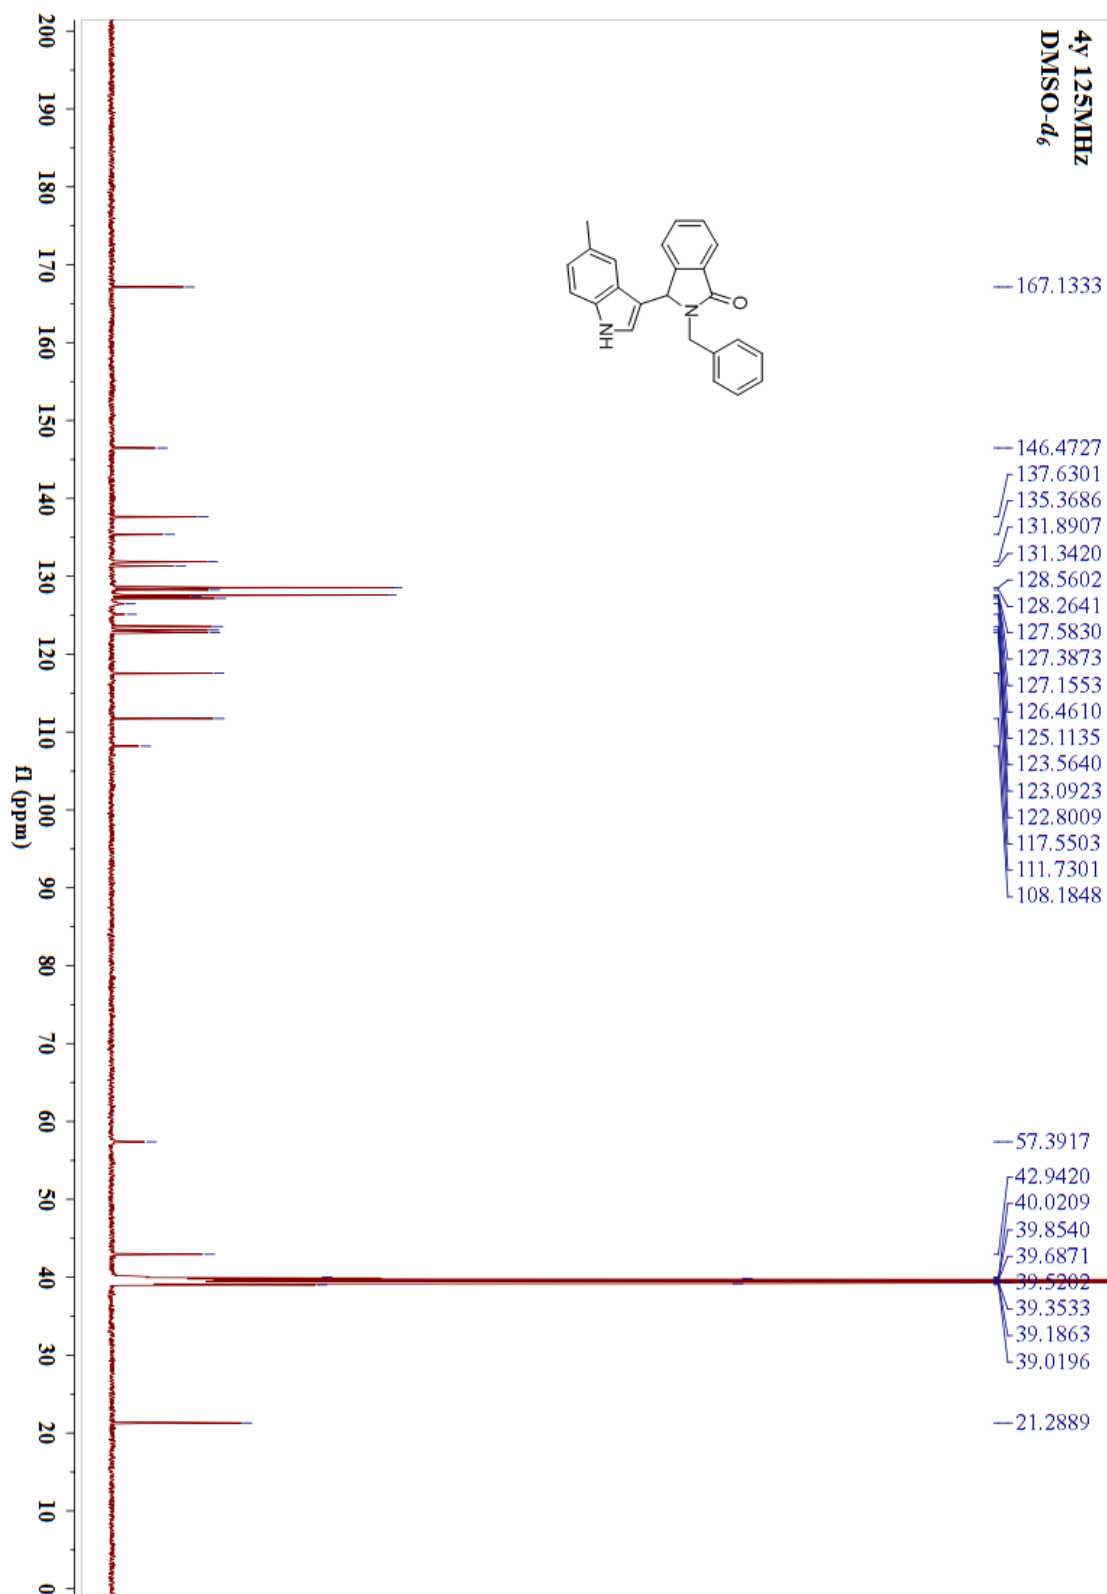



S73. LCMS spectrum of 2-benzyl-3-(1-methyl-1*H*-indol-3-yl)isoindolin-1-one (**4z**).

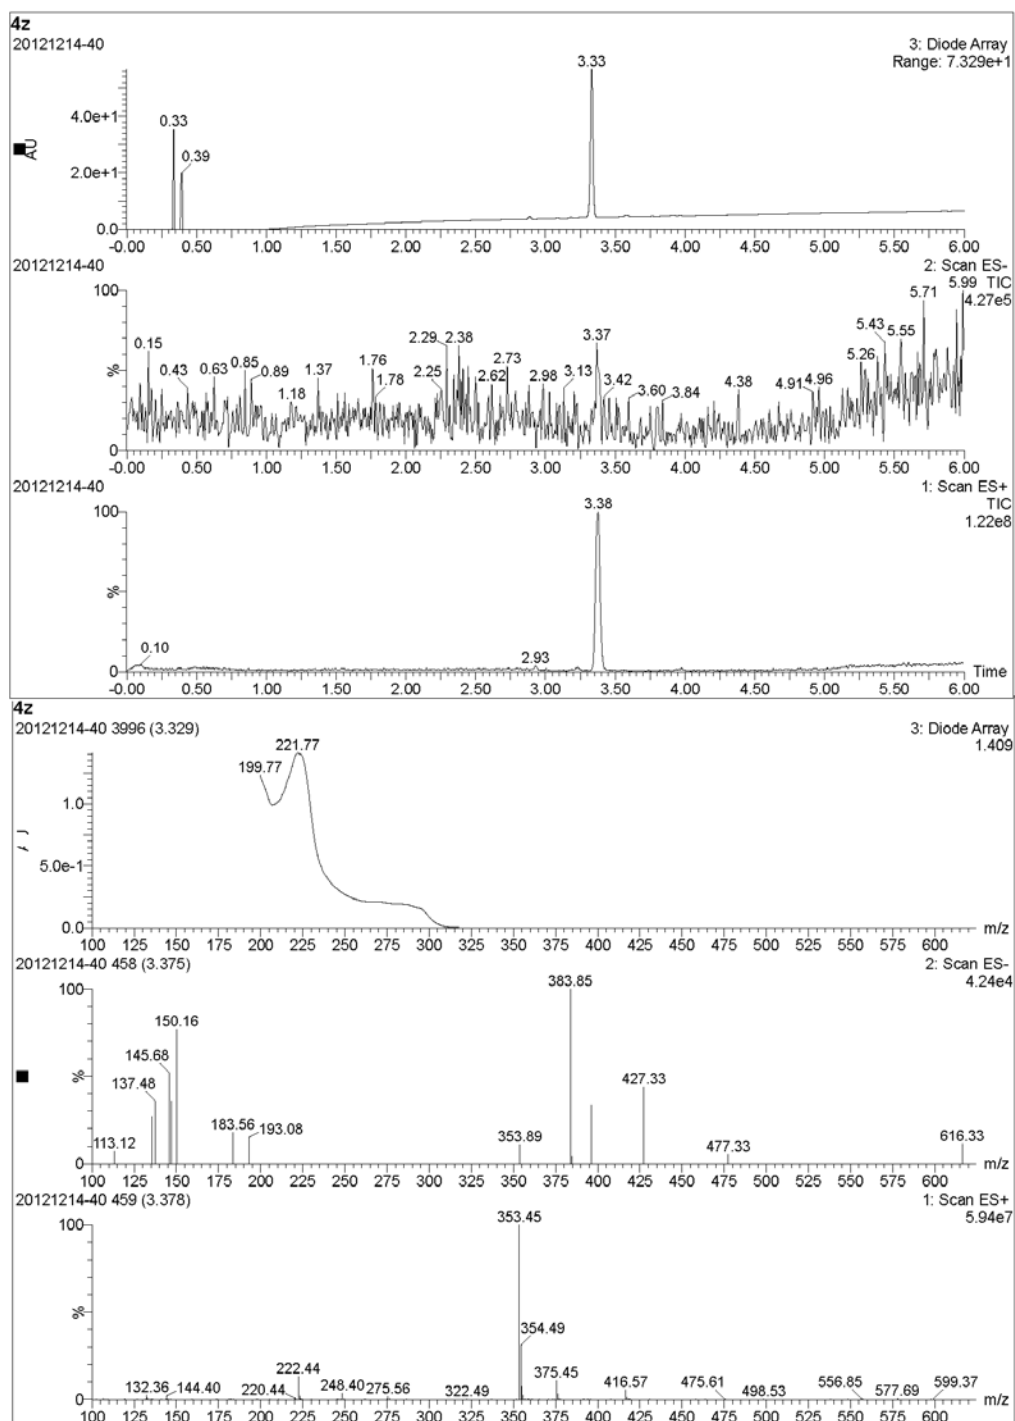

**S74.**  $^1\text{H}$  NMR spectrum of 2-benzyl-3-(1-methyl-1*H*-indol-3-yl)isoindolin-1-one (**4z**)  
in  $\text{DMSO-}d_6$ .

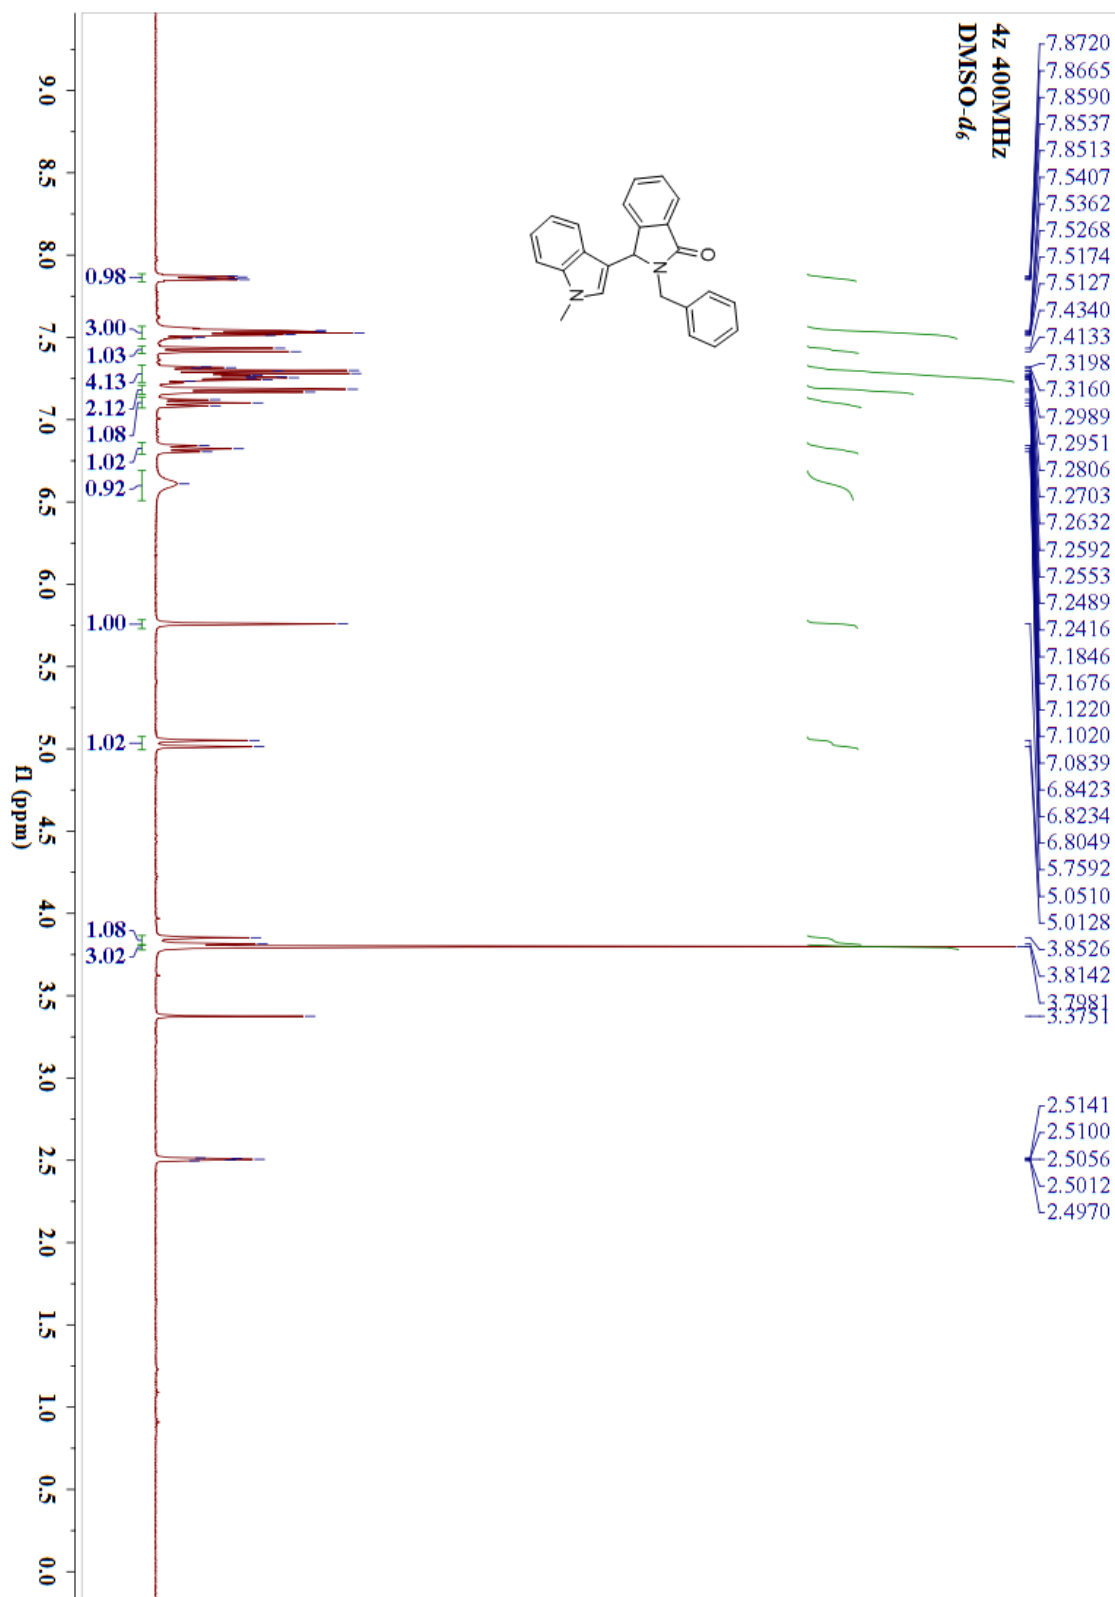

**S75.**  $^{13}\text{C}$  NMR spectrum of 2-benzyl-3-(1-methyl-1*H*-indol-3-yl)isoindolin-1-one (**4z**)  
in  $\text{DMSO-}d_6$ .

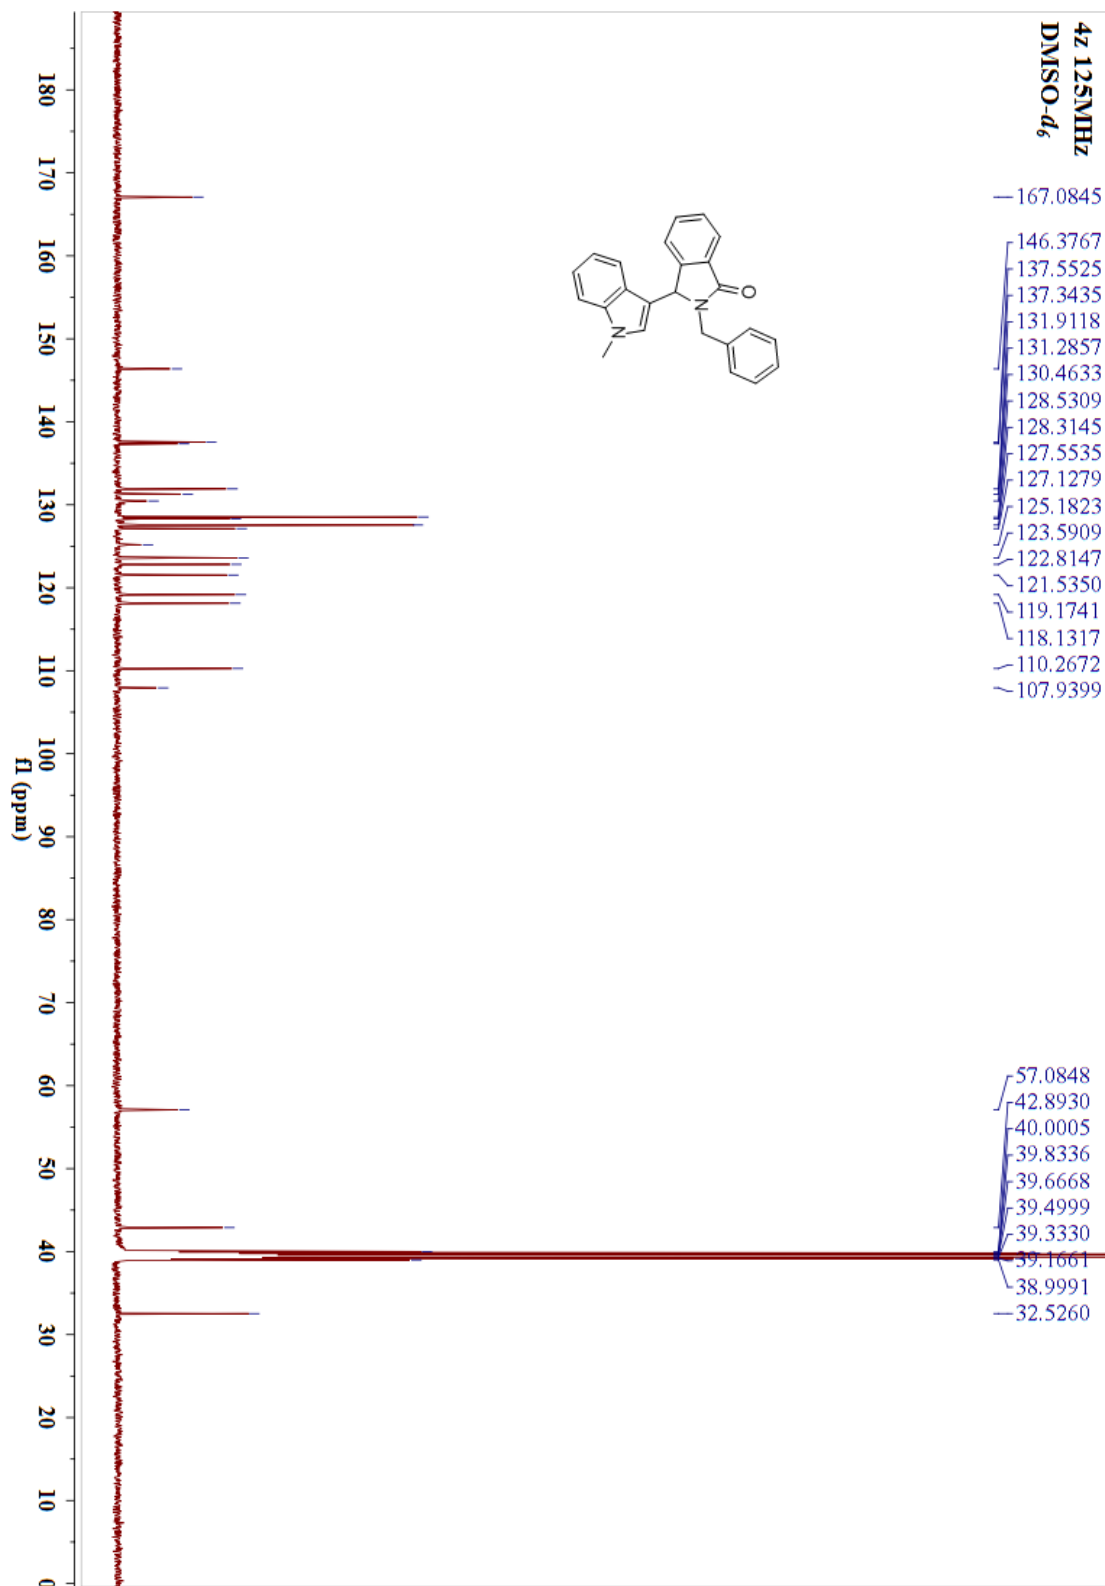

**S76.** LCMS spectrum of 2-benzyl-3-(1*H*-indol-3-yl)-6-methoxyisoindolin-1-one  
(**4aa**).

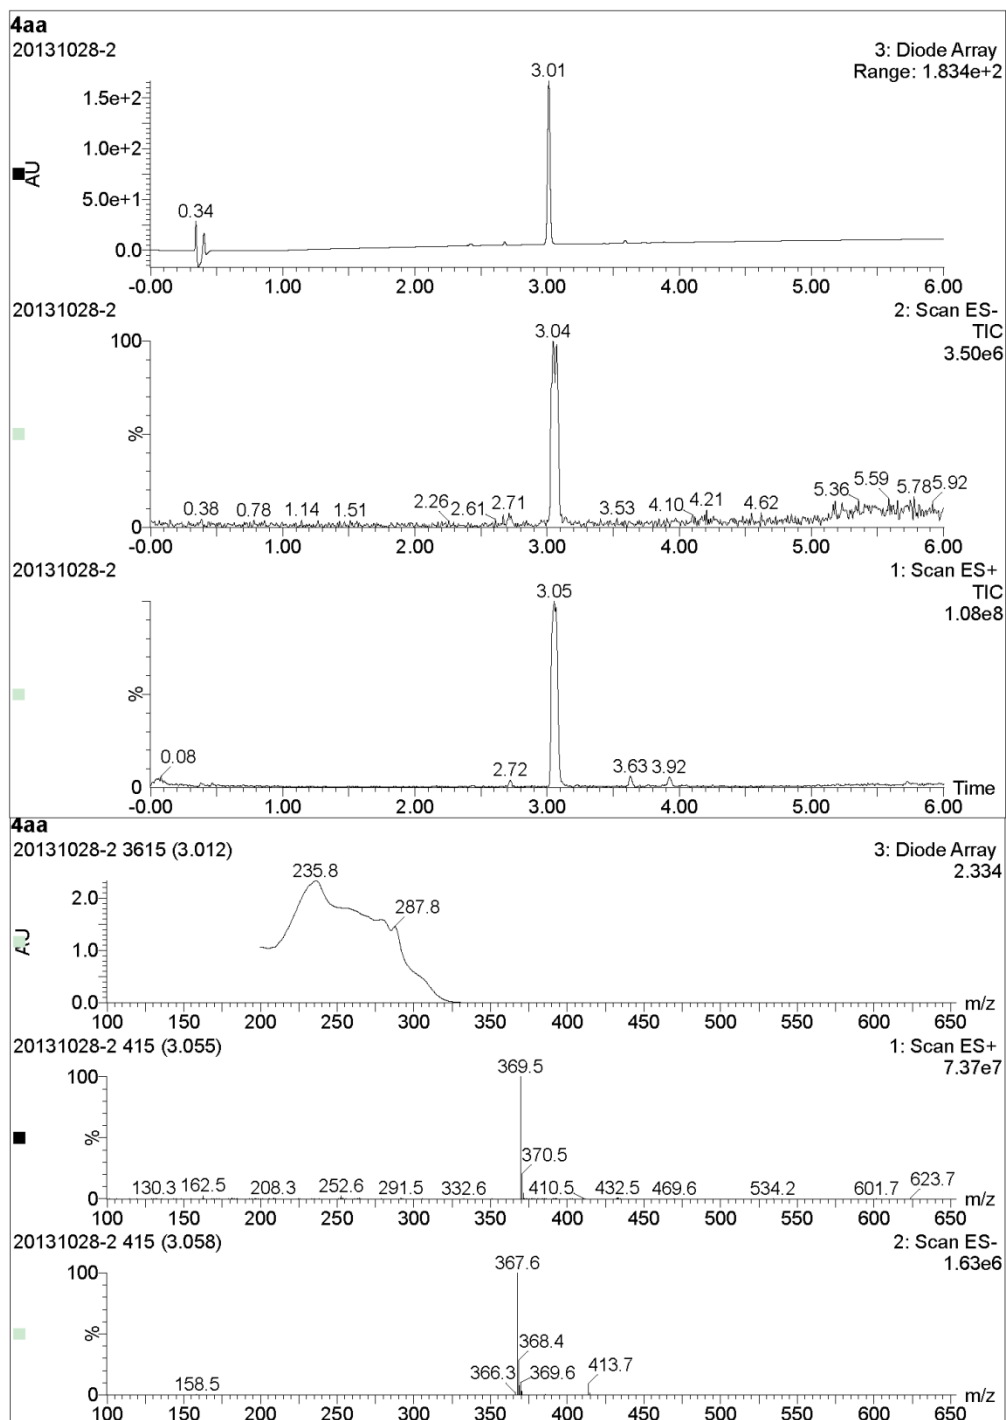

S77.  $^1\text{H}$  NMR spectrum of 2-benzyl-3-(1*H*-indol-3-yl)-6-methoxyisoindolin-1-one (4aa) in  $\text{DMSO-}d_6$ .

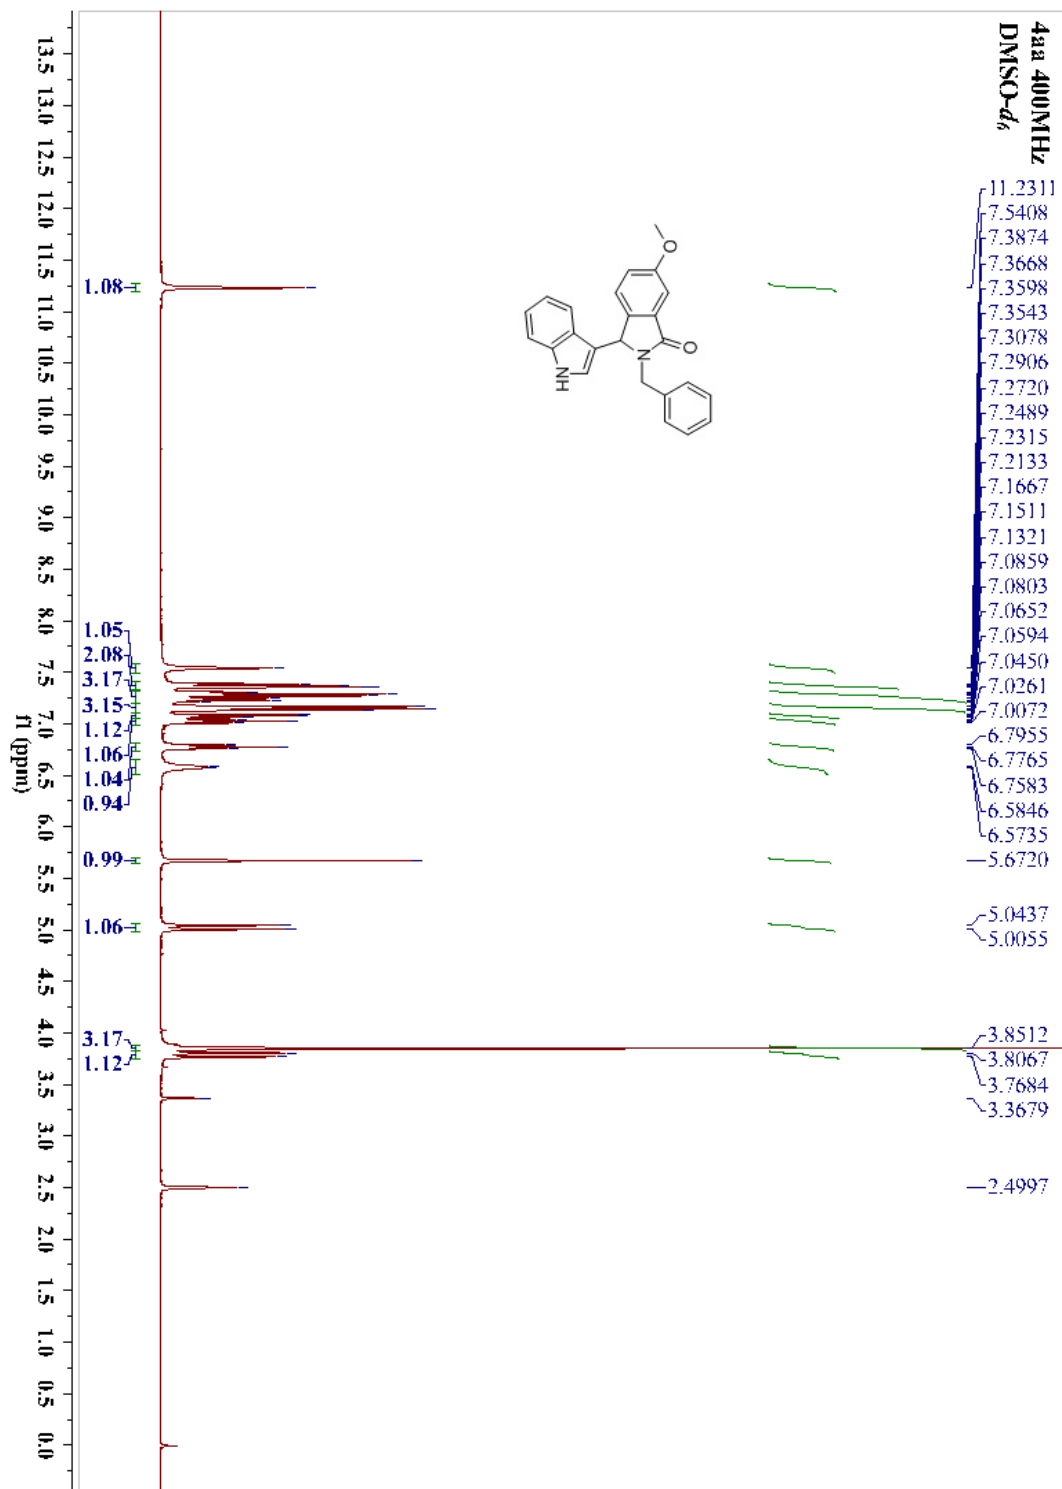

**S78.**  $^{13}\text{C}$  NMR spectrum of 2-benzyl-3-(1*H*-indol-3-yl)-6-methoxyisoindolin-1-one (**4aa**) in  $\text{DMSO-}d_6$ .

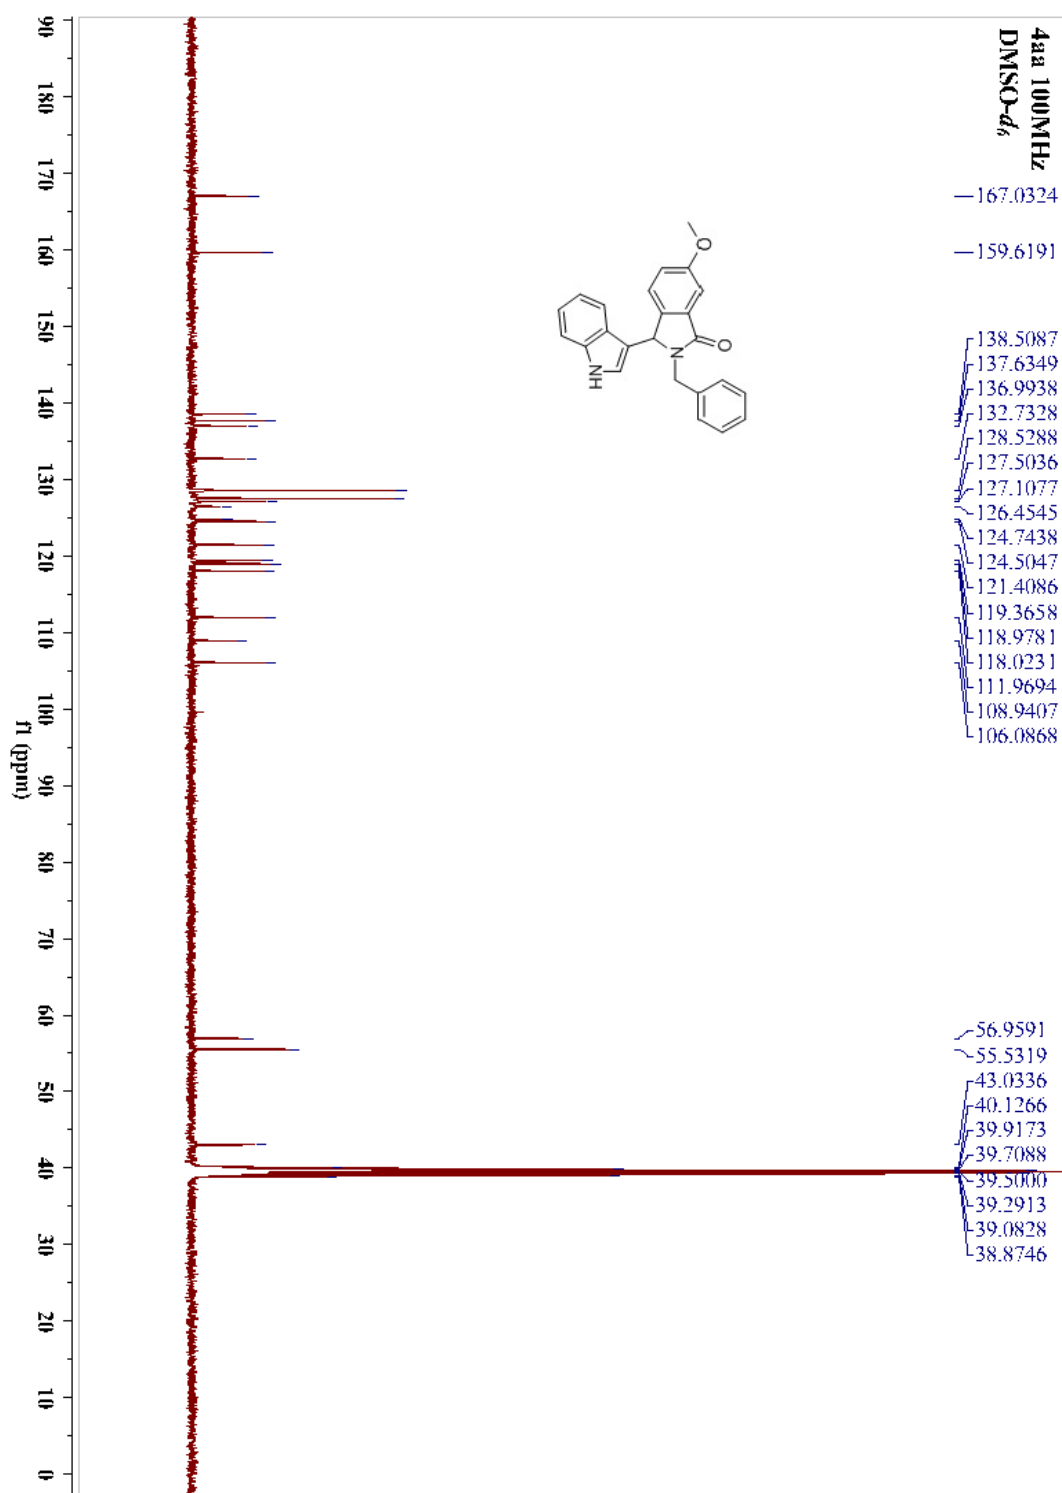

**S79.** LCMS spectrum of 2-benzyl-5-chloro-3-(1*H*-indol-3-yl)isoindolin-1-one (**4ab**).

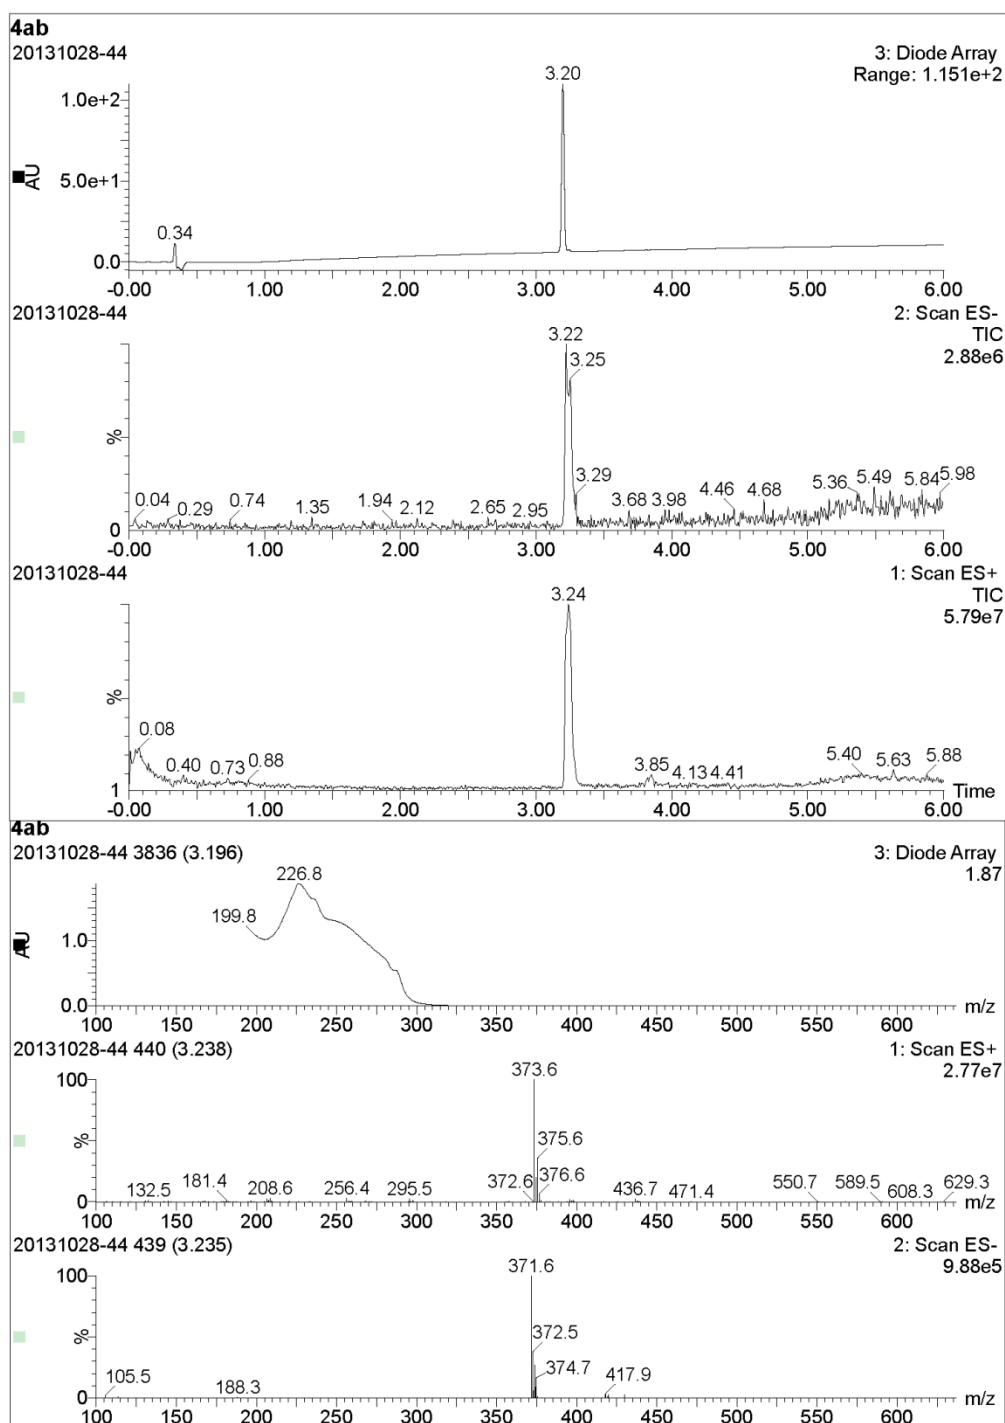

**S80.**  $^1\text{H}$  NMR spectrum of 2-benzyl-5-chloro-3-(1*H*-indol-3-yl)isoindolin-1-one (**4ab**)  
in  $\text{DMSO-}d_6$ .

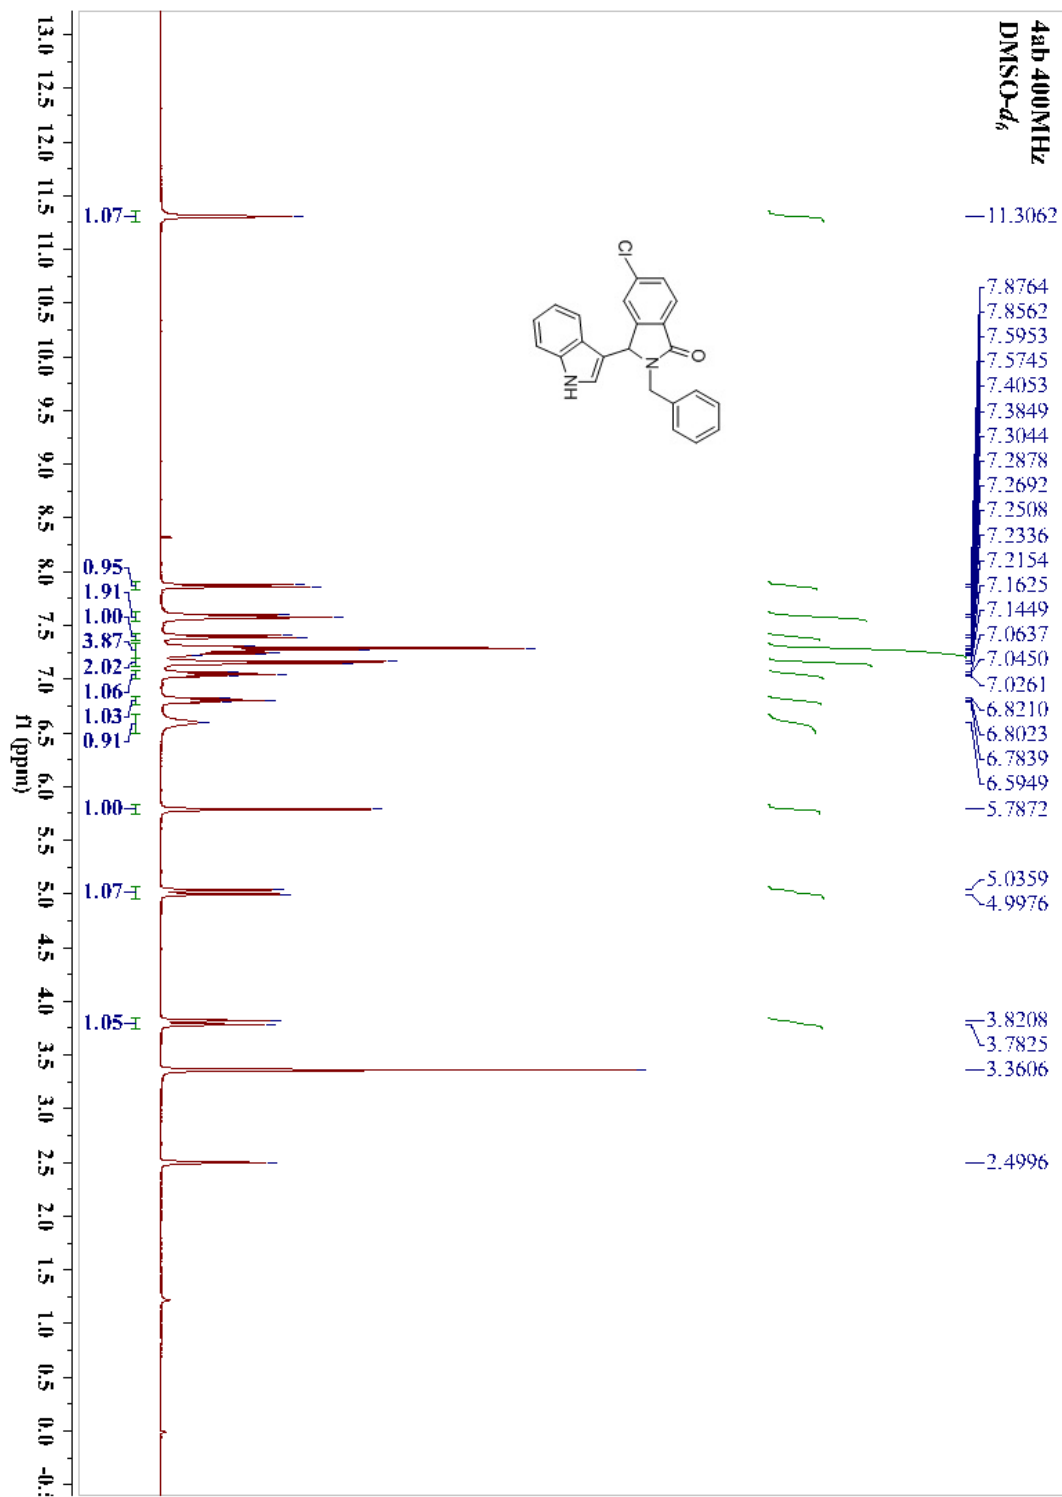



**S81.**  $^{13}\text{C}$  NMR spectrum of 2-benzyl-5-chloro-3-(1*H*-indol-3-yl)isoindolin-1-one (**4ab**)  
in  $\text{DMSO-}d_6$ .

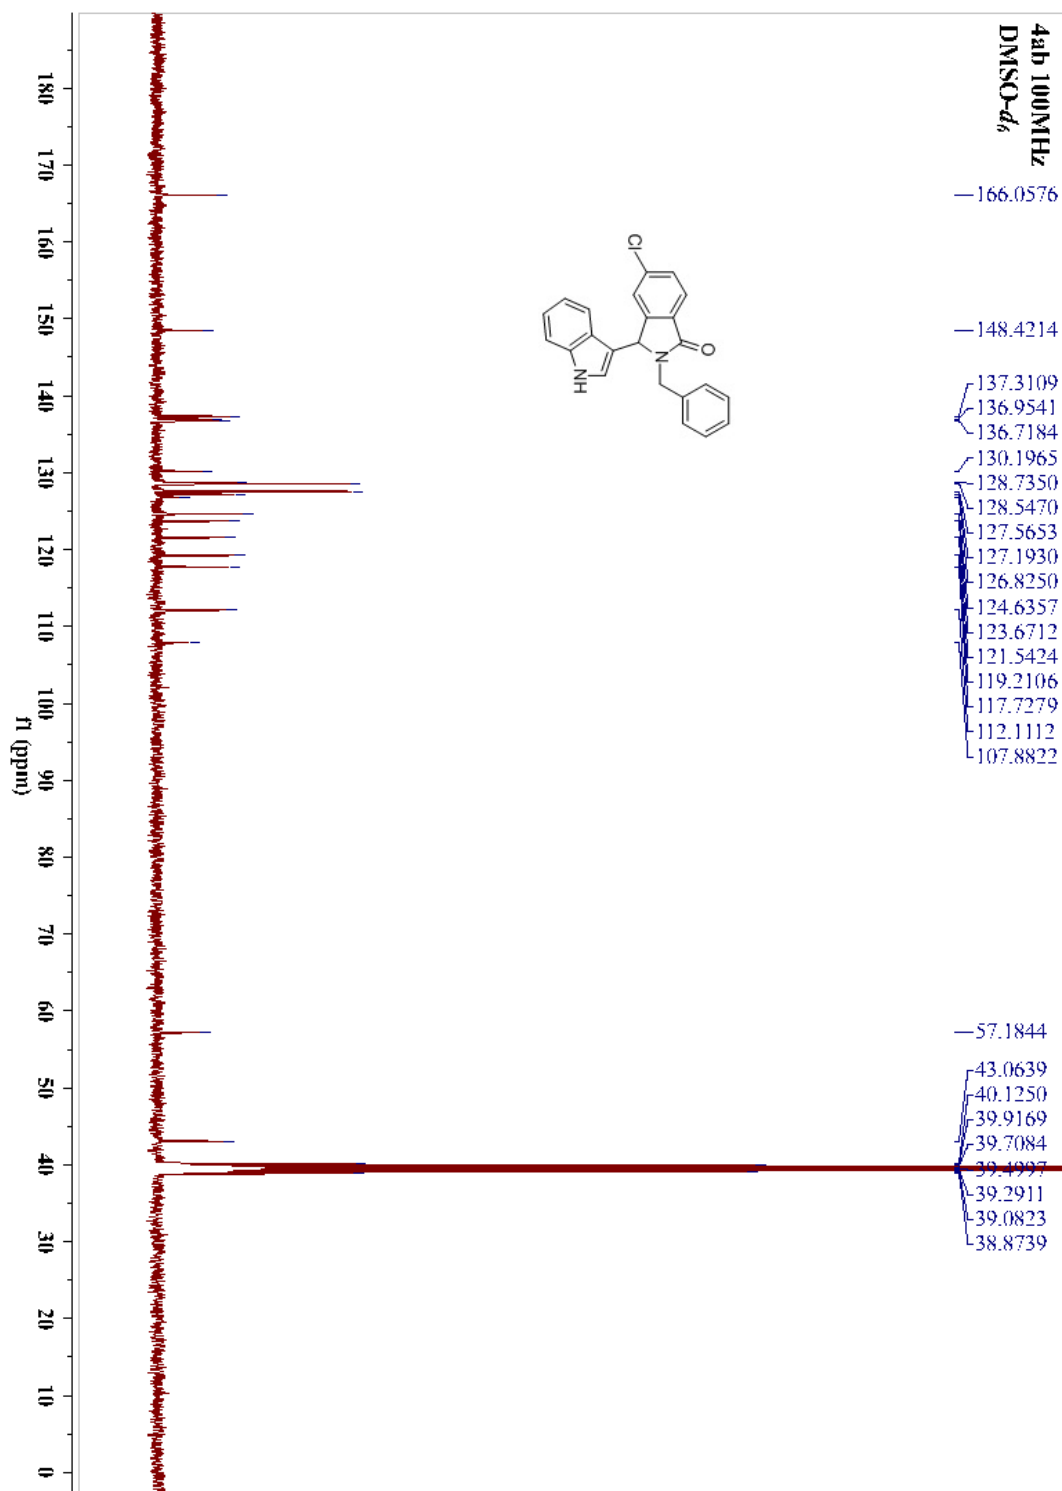

S82. LCMS spectrum of 2-benzyl-3-(1*H*-pyrrol-2-yl)isoindolin-1-one (**7**).

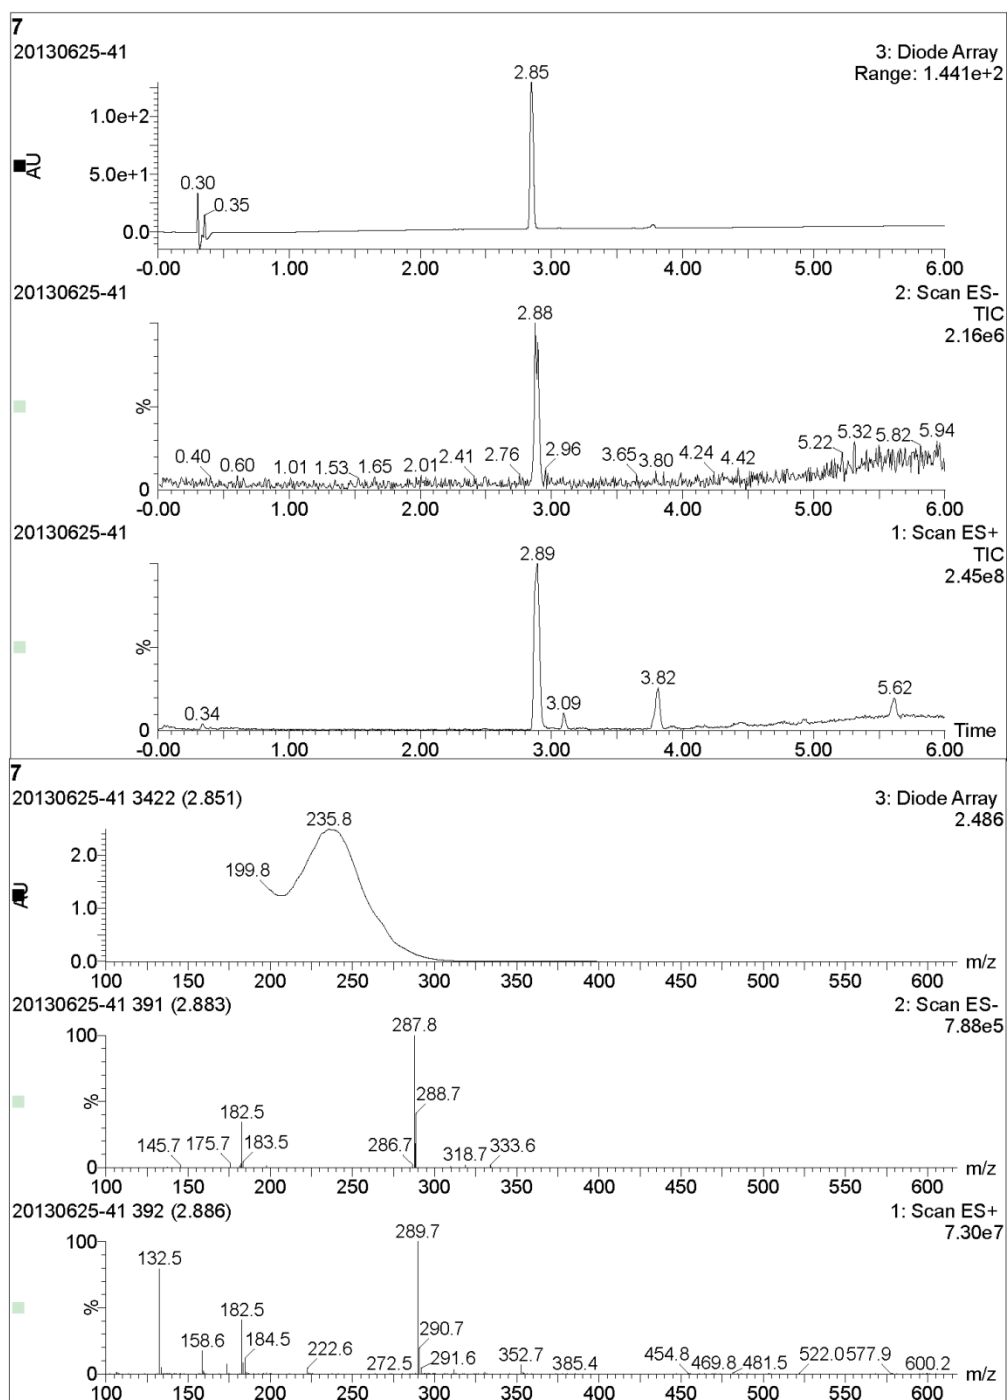

S83.  $^1\text{H}$  NMR spectrum of 2-benzyl-3-(1*H*-pyrrol-2-yl)isoindolin-1-one (**7**) in  $\text{DMSO-}d_6$ .

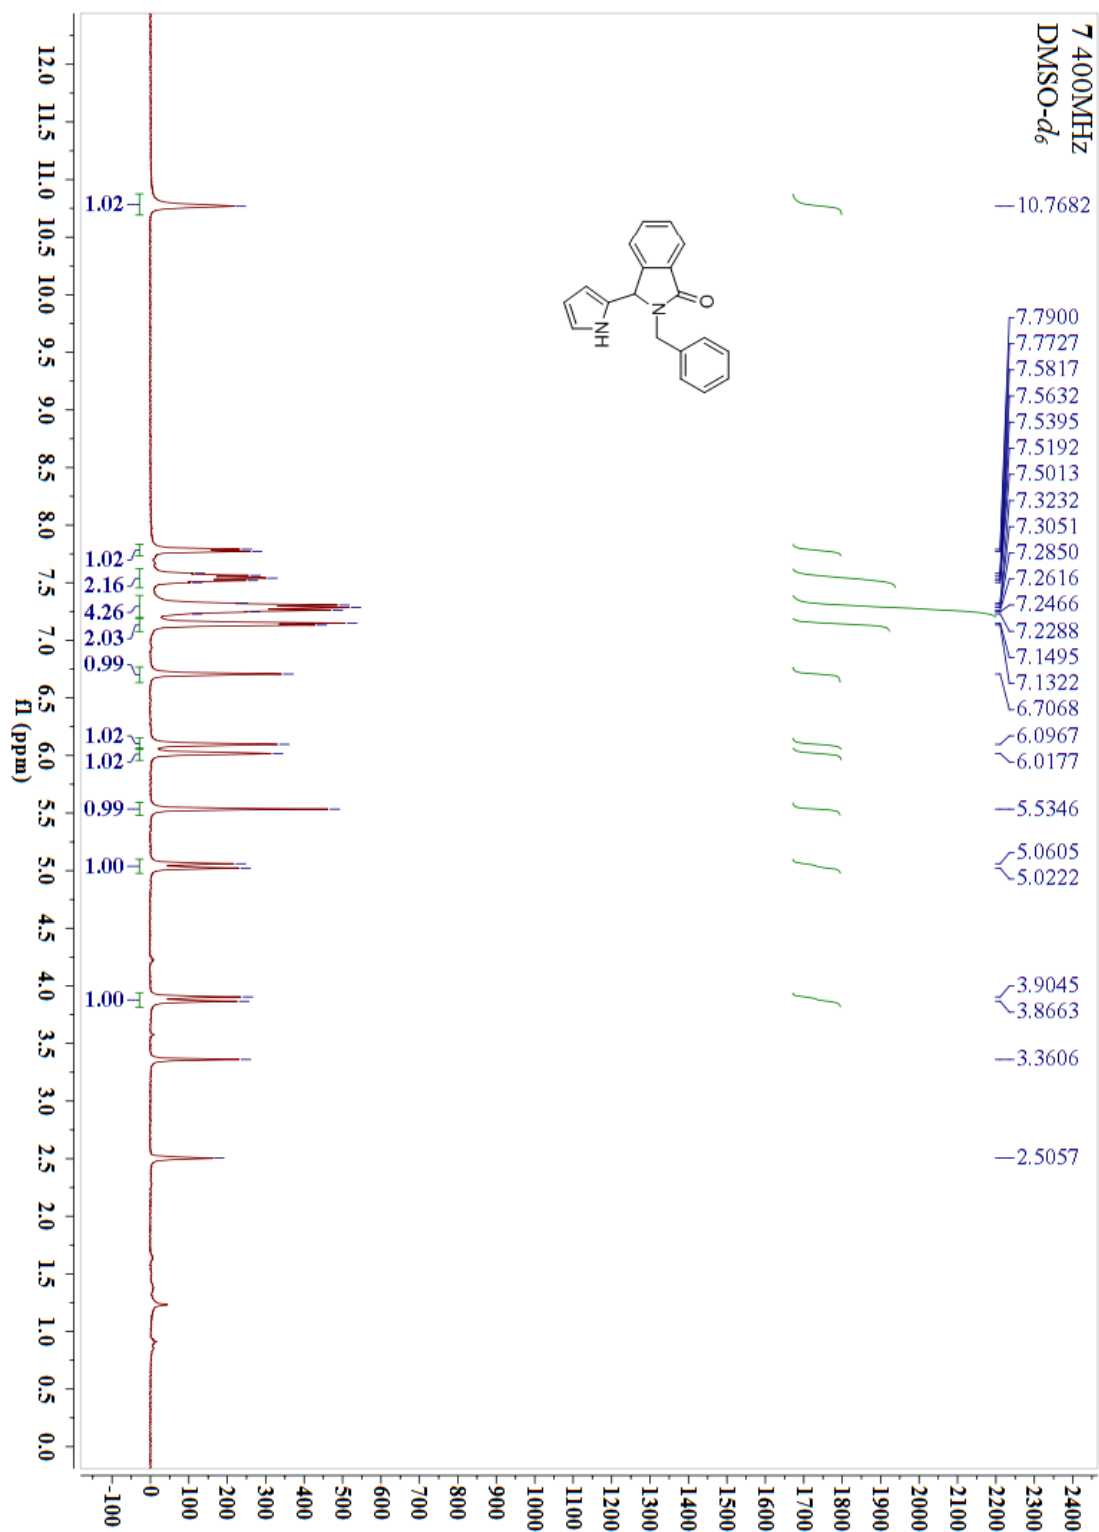

S84.  $^{13}\text{C}$  NMR spectrum of 2-benzyl-3-(1*H*-pyrrol-2-yl)isoindolin-1-one (**7**) in  $\text{DMSO-}d_6$ .

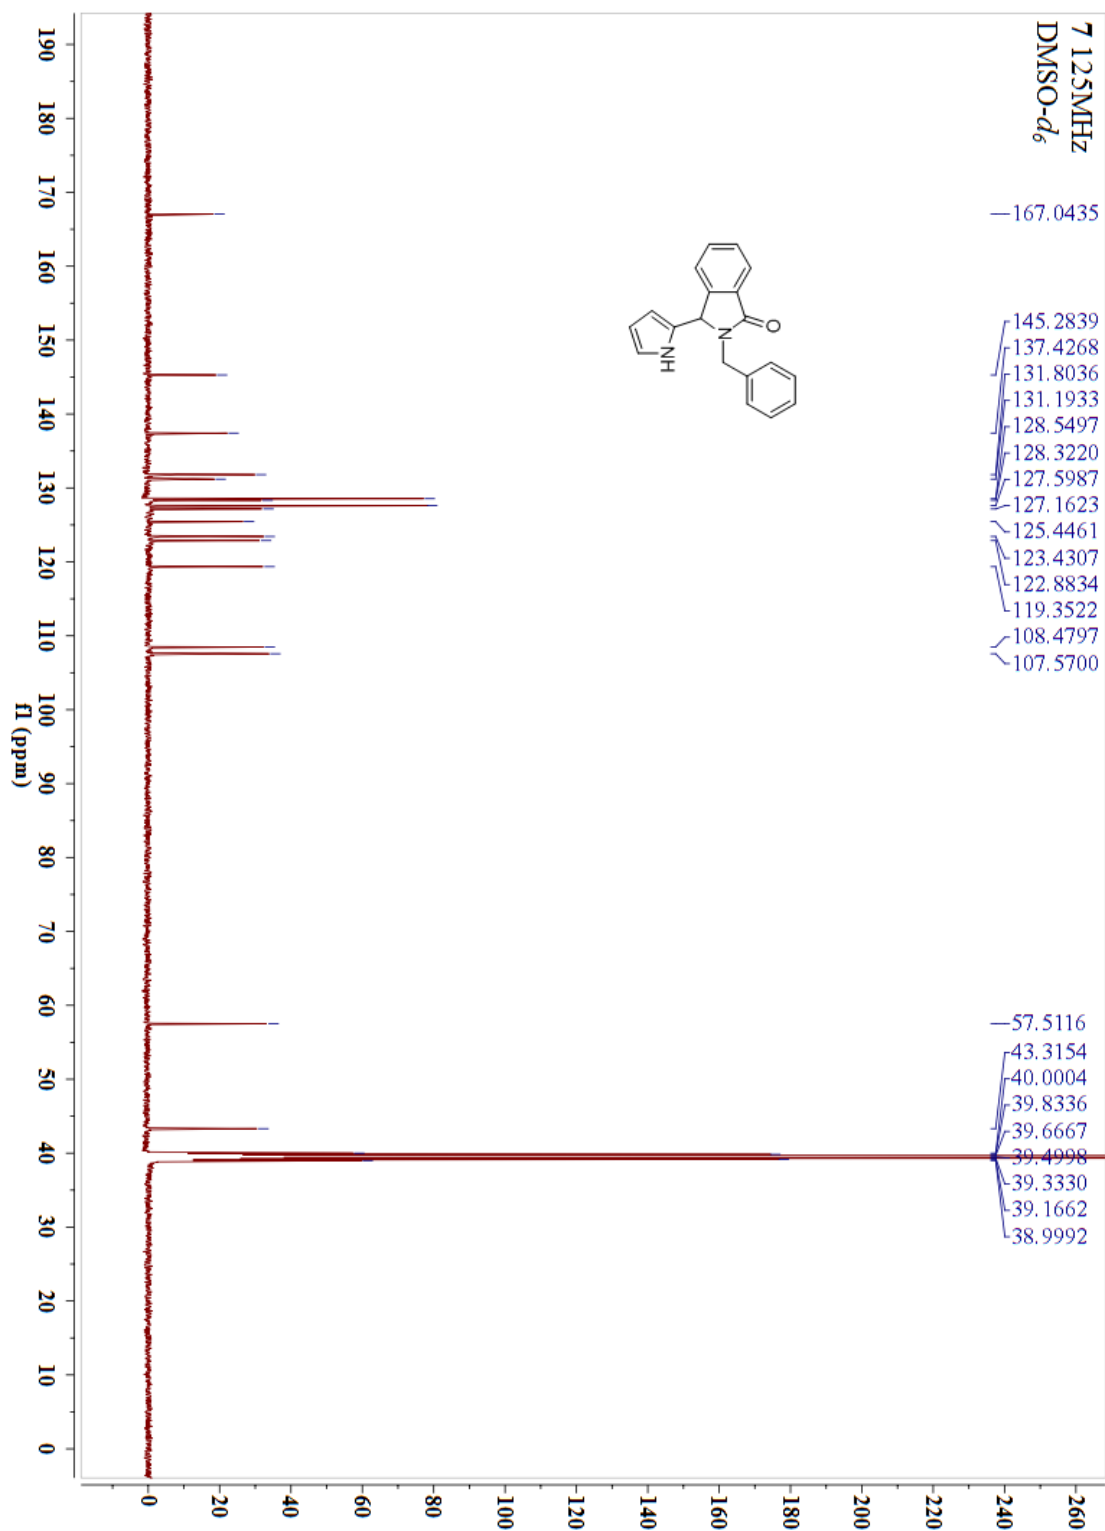

Supplement: c3gc41882k.pdf [file c3gc41882k.pdf]
